# Supplementary material for: Non-linear relationship between pulse pressure and the risk of pre-diabetes: a secondary retrospective Chinese cohort study
Source: PubMed Central journal article supplement — BMJ Open. 2024 Mar 23;14(3):e080018. doi: 10.1136/bmjopen-2023-080018 (PMC10961532; doi:10.1136/bmjopen-2023-080018), 2024-03-23
Supplement: bmjopen-2023-080018.draft_revisions.pdf [file bmjopen-2023-080018.draft_revisions.pdf]

# BMJ Open

BMJ Open is committed to open peer review. As part of this commitment we make the peer review history of every article we publish publicly available.

When an article is published we post the peer reviewers' comments and the authors' responses online. We also post the versions of the paper that were used during peer review. These are the versions that the peer review comments apply to.

The versions of the paper that follow are the versions that were submitted during the peer review process. They are not the versions of record or the final published versions. They should not be cited or distributed as the published version of this manuscript.

BMJ Open is an open access journal and the full, final, typeset and author-corrected version of record of the manuscript is available on our site with no access controls, subscription charges or pay-per-view fees (<http://bmjopen.bmj.com>).

If you have any questions on BMJ Open's open peer review process please email [info.bmjopen@bmj.com](mailto:info.bmjopen@bmj.com)

# BMJ Open

## Nonlinear relationship between pulse pressure and the risk of prediabetes: a secondary retrospective Chinese cohort study

|                               |                                                                                                                                                                                                                                                                                                                                                                                                                                                                                                          |
|-------------------------------|----------------------------------------------------------------------------------------------------------------------------------------------------------------------------------------------------------------------------------------------------------------------------------------------------------------------------------------------------------------------------------------------------------------------------------------------------------------------------------------------------------|
| Journal:                      | <i>BMJ Open</i>                                                                                                                                                                                                                                                                                                                                                                                                                                                                                          |
| Manuscript ID                 | bmjopen-2023-080018                                                                                                                                                                                                                                                                                                                                                                                                                                                                                      |
| Article Type:                 | Original research                                                                                                                                                                                                                                                                                                                                                                                                                                                                                        |
| Date Submitted by the Author: | 19-Sep-2023                                                                                                                                                                                                                                                                                                                                                                                                                                                                                              |
| Complete List of Authors:     | Cao, Changchun; Shenzhen Dapeng New District Nan'ao People's Hospital,<br>Han, Yong; Shenzhen Second People's Hospital, Department of Emergency<br>Hu, Haofei; The First Affiliated Hospital of Shenzhen University, Department of Nephrology<br>He, Yongcheng ; Shenzhen Hengsheng Hospital, Department of Nephrology; Affiliated Hospital of North Sichuan Medical College, Department of Nephrology<br>Luo, Jiao; Shenzhen Dapeng New District Nan'ao People's Hospital, Department of Rehabilitation |
| Keywords:                     | Blood Pressure, China, General diabetes < DIABETES & ENDOCRINOLOGY                                                                                                                                                                                                                                                                                                                                                                                                                                       |
|                               |                                                                                                                                                                                                                                                                                                                                                                                                                                                                                                          |

SCHOLARONE™  
Manuscripts

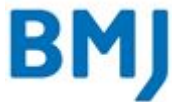

I, the Submitting Author has the right to grant and does grant on behalf of all authors of the Work (as defined in the below author licence), an exclusive licence and/or a non-exclusive licence for contributions from authors who are: i) UK Crown employees; ii) where BMJ has agreed a CC-BY licence shall apply, and/or iii) in accordance with the terms applicable for US Federal Government officers or employees acting as part of their official duties; on a worldwide, perpetual, irrevocable, royalty-free basis to BMJ Publishing Group Ltd ("BMJ") its licensees and where the relevant Journal is co-owned by BMJ to the co-owners of the Journal, to publish the Work in this journal and any other BMJ products and to exploit all rights, as set out in our [licence](#).

The Submitting Author accepts and understands that any supply made under these terms is made by BMJ to the Submitting Author unless you are acting as an employee on behalf of your employer or a postgraduate student of an affiliated institution which is paying any applicable article publishing charge ("APC") for Open Access articles. Where the Submitting Author wishes to make the Work available on an Open Access basis (and intends to pay the relevant APC), the terms of reuse of such Open Access shall be governed by a Creative Commons licence – details of these licences and which [Creative Commons](#) licence will apply to this Work are set out in our licence referred to above.

Other than as permitted in any relevant BMJ Author's Self Archiving Policies, I confirm this Work has not been accepted for publication elsewhere, is not being considered for publication elsewhere and does not duplicate material already published. I confirm all authors consent to publication of this Work and authorise the granting of this licence.

1 **Nonlinear relationship between pulse pressure and the risk of**  
2 **prediabetes: a secondary retrospective Chinese cohort study**

3 **Running title: PP and Pre-DM risk**

4 **Changchun Cao<sup>1#</sup>, Yong Han<sup>2#</sup>, Haofei Hu<sup>3\*</sup>, Yongcheng He<sup>4,5\*</sup>, Jiao Luo<sup>1\*</sup>**

5 <sup>1</sup>Department of Rehabilitation, Shenzhen Dapeng New District Nan'ao People's Hospital, Shenzhen 518000,  
6 Guangdong Province, China

7 <sup>2</sup>Department of Emergency, Shenzhen Second People's Hospital, The First Affiliated Hospital of Shenzhen  
8 University, Shenzhen 518000, Guangdong Province, China

9 <sup>3</sup>Department of Nephrology, Shenzhen Second People's Hospital, The First Affiliated Hospital of Shenzhen  
10 University, Shenzhen 518000, Guangdong Province, China

11 <sup>4</sup>Department of Nephrology, Shenzhen Hengsheng Hospital, Shenzhen 518000, Guangdong Province, China

12 <sup>5</sup>Department of Nephrology, Affiliated Hospital of North Sichuan Medical College, Nanchong, 637000, Sichuan  
13 Province, China

14  
15 Changchun Cao and Yong Han have contributed equally to this work.

16 \*Corresponding author

17 Haofei Hu

18 Department of Nephrology, The First Affiliated Hospital of Shenzhen University, Shenzhen 518000, Guangdong  
19 Province, China

20 E-mail: huhaofei0319@126.com

21 Yongcheng He

22 Department of Nephrology, Shenzhen Hengsheng Hospital, No.20 Yintian Road, Xixiang Street, Baoan District,

1  
2  
3  
4  
5  
6  
7  
8  
9  
10  
11  
12  
13  
14  
15  
16  
17  
18  
19  
20  
21  
22  
23  
24  
25  
26  
27  
28  
29  
30  
31  
32  
33  
34  
35  
36  
37  
38  
39  
40  
41  
42  
43  
44  
45  
46  
47  
48  
49  
50  
51  
52  
53  
54  
55  
56  
57  
58  
59  
60

- 23 Shenzhen 518000, Guangdong Province, China.
- 24 Department of Nephrology, Affiliated hospital of North Sichuan Medical College, No.1 Maoyuan South Road,
- 25 Nanchong, Sichuan, China.
- 26 E-mail: heyongcheng640815@126.com
- 27 Jiao Luo
- 28 Department of Rehabilitation, Shenzhen Dapeng New District Nan'ao People's Hospital, No. 6, Renmin Road,
- 29 Dapeng New District, Shenzhen 518000, Guangdong Province, China.
- 30 E-mail: luojiao1989@email.szu.edu.cn
- 31
- 32
- 33
- 34
- 35
- 36
- 37
- 38
- 39
- 40
- 41
- 42
- 43
- 44
- 45
- 46
- 47
- 48
- 49
- 50
- 51
- 52
- 53
- 54
- 55
- 56
- 57
- 58
- 59
- 60

## 45 **Abstract**

46 **Objective:** Previous research has shown that pulse pressure (PP) has a significant role in the start  
47 and development of type 2 diabetes mellitus. However, there is little proof that PP and prediabetes  
48 (Pre-DM) are related. Our study aimed to investigate the relationship between PP and incident  
49 Pre-DM in a substantial cohort of Chinese participants.

50 **Design:** The 'DATADRYAD' database ([www.Datadryad.org](http://www.Datadryad.org)) was used to retrieve the data for this  
51 secondary retrospective cohort analysis.

52 **Participants:** Data from 182672 Chinese individuals who participated in the medical examination  
53 program were recorded in this retrospective cohort study between 2010 and 2016 across 32 sites  
54 and 11 cities in China.

55 **Setting:** PP assessed at baseline and incident Pre-DM during follow-up were the  
56 target-independent and dependent variables. The association between PP and Pre-DM was  
57 investigated using Cox proportional hazards regression.

58 **Primary outcome measures:** The outcome was incident Pre-DM. Impaired fasting glucose levels  
59 (fasting blood glucose between 5.6 and 6.9 mmol/L) were used to define Pre-DM.

60 **Results:** After controlling for confounding variables, PP was positively correlated with incident  
61 Pre-DM among Chinese adults (HR: 1.009, 95%CI: 1.007-1.010). Additionally, at a PP inflection  
62 point of 29 mmHg, a nonlinear connection between the PP and incident Pre-DM was discovered.  
63 Increased PP was an independent risk factor for developing Pre-DM when PP was greater than 29  
64 mmHg. However, their association was not significant when PP was less than 29 mmHg.  
65 According to subgroup analyses, females, never smokers, and non-obesity correlated more  
66 significantly with PP and Pre-DM.

1  
2  
3  
4 67 **Conclusion:** We discovered that higher PP independently correlated with Pre-DM risk in this  
5  
6 68 study of Chinese participants. The connection between PP and incident Pre-DM was also  
7  
8  
9 69 nonlinear. High PP levels were related to a higher chance of developing pre-DM when PP was  
10  
11 70 above 29 mmHg.  
12  
13  
14 71  
15  
16  
17 72  
18  
19  
20 73  
21  
22 74  
23  
24  
25 75  
26  
27 76  
28  
29  
30 77  
31  
32 78  
33  
34  
35 79  
36  
37 80  
38  
39  
40 81  
41  
42  
43 82  
44  
45 83  
46  
47  
48 84  
49  
50  
51 85  
52  
53 86  
54  
55  
56 87  
57  
58 88  
59  
60

1  
2  
3  
4 89 **Article Summary**  
5

6 90 **Article focus**  
7

8  
9 91 Our study investigated the relationship between PP and incident Pre-DM in a secondary  
10  
11 92 retrospective cohort of Chinese participants.  
12  
13

14 93 **Key Messages**  
15

16  
17 94 We found that elevated PP was independently associated with an increased risk of Pre-DM in our  
18  
19 95 study involving Chinese participants.  
20  
21

22 96 Higher PP levels were associated with a greater risk of developing Pre-DM when PP exceeded 29  
23  
24 97 mmHg.  
25  
26

27 98 Further investigation is needed to understand PP's impact on the incident Pre-DM.  
28  
29

30 99 **Strengths and limitations of this study**  
31

32 100 Our research leveraged a substantial sample size, drawing participants from multiple centers, thus  
33  
34 101 ensuring a robust representation of the Chinese population.  
35  
36

37 102 We elucidated a nonlinear relationship, marking the pioneering effort to pinpoint the inflection  
38  
39 103 point of PP's impact on Pre-DM.  
40  
41

42 104 Our subgroup analysis allowed us to delve into other potential risk factors within the PP and  
43  
44 105 incident Pre-DM association.  
45  
46

47  
48 106 Our study did not incorporate a 2-hour oral glucose tolerance test or glycosylated hemoglobin  
49  
50 107 level measurements, which could potentially lead to an underestimation of the incidence of  
51  
52 108 Pre-DM.  
53  
54

55  
56 109  
57

58  
59 110  
60



## 111 **Introduction**

112 Prediabetes (Pre-DM) is intermediate hyperglycemia below the diagnostic cutoff for type 2  
113 diabetes mellitus (T2DM). Patients with Pre-DM have been reported to have a higher risk for  
114 cardiovascular disease and nephropathy, indicating that impaired glucose begins to have a  
115 pathogenic effect at this early stage of diabetes[1]. The prevalence of Pre-DM is increasing  
116 globally with an aging population, urbanization, and changing lifestyles. From 2008 to 2017, the  
117 prevalence of Pre-DM in China has climbed from 15.5%[2] to 35.2%[3], creating a significant  
118 public health burden. Approximately 70% of subjects with Pre-DM will eventually get T2DM[4].  
119 Numerous studies looked for ways to pinpoint the causes of diabetes and Pre-DM to prevent and  
120 cure the disease in its earliest stages.

121 Pulse pressure (PP) is referred to as the difference between systolic blood pressure (SBP) and  
122 diastolic blood pressure (DBP). Clinically, PP is the manifestation of atherosclerosis[5].  
123 Compared to their non-diabetic contemporaries, people with T2DM have greater atherosclerosis,  
124 which results in a broad PP[5]. A greater risk of cardiovascular disease (CVD) exists in T2DM  
125 patients[6]. In addition, an increase in PP is another risk factor for CVD incidence and positively  
126 correlates with mortality[7-9]. Additionally, compared to healthy individuals, prediabetic patients  
127 have a greater burden from coronary atherosclerosis[10]. Notably, the atherosclerosis burden  
128 began to develop even before T2DM's clinical symptoms[10]. PP was found to be a significant  
129 risk factor for T2DM in a recent retrospective cohort investigation of a sizable sample[11].  
130 However, whether prediabetes in Chinese adults is associated with PP is unknown. This study  
131 sought to analyze the precise correlation between PP and the likelihood of developing Pre-DM in  
132 Chinese participants.

## 133 **Methods**

### 134 **Data source**

135 Researchers can obtain original research data for free via the Dryad Digital Repository. The  
136 Dryad data repository's data on 211833 Chinese persons was downloaded[12]. The current  
137 research employed openly available data from a medical examination program as a secondary  
138 inquiry. Researchers may use the data for secondary analysis in accordance with the Dryad terms  
139 of service without interfering with the interests of the authors.

### 140 **Study population**

141 Each participant conducted under the Rich Healthcare Group Review Board, gave their written  
142 informed permission before taking part[12]. In addition, the Declaration of Helsinki was followed  
143 during our research. The necessary standards and legislation were followed in the execution of all  
144 procedures, including the declarations in the Declarations section.

145 Individuals were excluded from the investigation under these conditions: (1) diabetes at  
146 baseline; (2) diabetes or not defined diabetes status at follow-up; (3) abnormal body mass index  
147 (BMI) values (BMI over 55 or less than 15 kg/m<sup>2</sup>); (4) lacking data on baseline fasting plasma  
148 glucose (FPG), FPG at follow-up, height, DBP, gender, weight, and SBP; (5) FPG>6.9mmol/L  
149 during follow-up and FPG≥5.6mmol/L at baseline; (6) follow-up interval < 2 years; (7) PP outliers  
150 (three standard deviations above or below the mean). Finally, 182672 subjects eventually entered  
151 the study. The study's design and participant flow are shown in Figure 1.

### 152 **Data collection**

153 Trained staff members gathered and compiled all of the data. Data from laboratory inspections  
154 were gathered in the original study under uniform conditions using standardized handling

1  
2  
3  
4 155 procedures. The skilled personnel, including height, blood pressure, body weight, and age,  
5  
6 156 gathered demographic information. Professional trainees without light clothing and shoes measure  
7  
8  
9 157 individuals for weight and height. Weight/Height<sup>2</sup> (kg/m<sup>2</sup>) was used to compute BMI. Trained  
10  
11  
12 158 staff members took blood pressure using a standard mercury sphygmomanometer. A Beckman  
13  
14 159 5800 autoanalyzer was used to measure laboratory data, such as low-density lipoprotein  
15  
16  
17 160 cholesterol (LDL-C), FPG, total cholesterol (TC), aspartate aminotransferase (AST), blood urea  
18  
19 161 nitrogen (BUN), triglyceride (TG), alanine aminotransferase (ALT), serum creatinine (Scr), and  
20  
21  
22 162 high-density lipoprotein cholesterol (HDL-C). SBP (mmHg) - (DBP (mmHg)) were the formulas  
23  
24  
25 163 used to compute PP.

#### 26 27 164 **Diagnosis of Pre-DM**

28  
29  
30 165 Impaired fasting glucose levels (FPG between 5.6 and 6.9 mmol/L) were used to define  
31  
32  
33 166 Pre-DM[13].

#### 34 35 167 **Statistical analysis**

36  
37  
38 168 R software version 3.4.3 and EmpowerStats (R) version 4.0 were used for all statistical  
39  
40  
41 169 analyses.

42  
43 170 We initially assessed the baseline data distribution by categorizing it into quartiles based on the  
44  
45  
46 171 PP ( $Q1 \leq 36$ ;  $36 < Q2 \leq 43$ ;  $43 < Q3 \leq 50$ ;  $50 < Q4$ ). Continuous data were reported as medians with  
47  
48  
49 172 interquartile ranges (25th-75th percentile) or means with standard deviations (SD), while  
50  
51  
52 173 categorical data were expressed as frequencies and percentages. The Kruskal-Wallis H test,  
53  
54  
55 174 chi-square test, and one-way ANOVA were employed to assess disparities between PP groups.  
56  
57  
58 175 The cumulative incidence and terms person-year were used to represent incidence rates[14].  
59  
60 176 Comparisons of survival and cumulative event rates were done using the Kaplan-Meier method.

1  
2  
3  
4 177 Using the log-rank test, we also examined the Kaplan-Meier hazard ratios (HR) of unfavorable  
5  
6 178 events [15].  
7  
8

9 179 There were 133257 (72.32%), 4240 (2.30%), 1541 (0.84%), 4209 (2.28%), 107684 (58.44%),  
10  
11 180 82879 (44.98%), 18563 (10.07%), 83382 (45.25%), 9759 (5.30%) and 133257 (72.32%)  
12  
13  
14 181 individuals with missing data for smoking status, TG, ALT, TC, AST, LDL-C, BUN, HDL-C,  
15  
16  
17 182 SCr, and drinking status, respectively. The present study employed multiple imputations to handle  
18  
19  
20 183 the missing data of covariants. The imputation model included smoking status, BMI, TG, ALT,  
21  
22 184 TC, AST, LDL-C, BUN, HDL-C, SCr, FPG, sex, family history of diabetes, drinking status, and  
23  
24  
25 185 age. Processes for missing data analysis employ the assumption of missing at random[16].  
26

27 186 This analysis assessed each factor's impact on incident Pre-DM using univariate Cox  
28  
29  
30 187 proportional hazards regression models. The multivariate Cox regression analysis also examined  
31  
32  
33 188 the precise connection between the PP and incident Pre-DM. In addition, we created three models  
34  
35  
36 189 (fully-adjusted, minimally-adjusted, and non-adjusted) to evaluate the connection between PP and  
37  
38  
39 190 incident Pre-DM. Suppose the HR is changed by at least 10% after the covariance is included in  
40  
41  
42 191 the model. At this point, the covariance should be adjusted[17].  
43

44 192 The current analysis conducted several sensitivity analyses to determine if the findings were  
45  
46  
47 193 trustworthy. We converted PP into a categorical variable based on the quartile. We computed the  
48  
49  
50 194 P for the trend to verify the outcomes of the PP as the continuous variable and test for  
51  
52  
53 195 nonlinearity. Obesity and older adults were connected to a greater occurrence of Pre-DM. Thus,  
54  
55  
56 196 we excluded individuals with BMI  $\geq 25\text{kg/m}^2$  or age  $\geq 60$  years for subsequent sensitivity  
57  
58  
59 197 analyses to examine the connection between PP and Pre-DM risk. Additionally, we incorporated  
60  
198 the continuous covariate as a curve to the equation using a generalized additive model (GAM) to

1  
2  
3  
4 199 confirm the validity of the results.  
5

6 200 Considering PP is a continuous variable, we investigated potential nonlinear correlations  
7  
8  
9 201 between PP and Pre-DM using the Cox proportional hazards regression with cubic spline  
10  
11 202 functions and smooth curve fitting. If the relationship proved nonlinear, a two-piecewise Cox  
12  
13 203 proportional hazards regression model was applied to pinpoint the inflection point[18]. The study  
14  
15 204 determined the most appropriate model for PP's connection with Pre-DM through log-likelihood  
16  
17 205 ratio analysis.  
18  
19  
20  
21

22 206 Subgroup analysis, utilizing the Cox proportional hazard model, was also conducted. Subgroup  
23  
24 207 variables included smoking status, age, BMI, family history of diabetes, gender, and drinking  
25  
26 208 status. Stratification was performed based on medians or established clinical cut points[19], and  
27  
28 209 variables such as age (<60, ≥60 years) and BMI (<25, ≥25 kg/m<sup>2</sup>) were converted into categorical  
29  
30 210 factors. Each stratum underwent a thoroughly adjusted analysis, except for the stratification factor.  
31  
32 211 The likelihood ratio tests were conducted to ascertain subgroup interactions[20, 21]. The study  
33  
34 212 adhered to the STROBE statement for all outcomes[17, 22]. Statistical significance was  
35  
36 213 determined by a P-value < 0.05, using two-tailed tests.  
37  
38  
39  
40  
41  
42

## 43 214 **Results**

### 44 215 **Characteristics of individuals**

45  
46  
47 216 In the current research, 182672 individuals deemed free of Pre-DM at baseline were included.  
48  
49 217 The average age was 40.832 ± 11.864 years, and 53.082% of individuals were male. Twenty  
50  
51 218 thousand two hundred eighty-four individuals eventually got Pre-DM after an average of 3.143  
52  
53 219 years of follow-up. Table 1 displays comprehensive clinical measurements, biochemical tests, and  
54  
55 220 various parameters. We categorized participants into subgroups based on PP quartiles (Q1≤36;  
56  
57  
58  
59  
60

1  
2  
3  
4 221 36<Q2≤43; 43<Q3≤50; 50<Q4). Compared to the Q1 group, the other groups (Q2 group, Q3  
5  
6 222 group, Q4 group) had higher ALT, BMI, age, TG, Scr, TC, AST, BUN, LDL-C, and lower  
7  
8  
9 223 HDL-C. Additionally, the Q4 group had a higher proportion of men, smokers, and drinkers.

#### 10 11 224 **The incidence rate of Pre-DM**

12  
13  
14 225 During the follow-up, 20284 individuals developed incident Pre-DM, as outlined in  
15  
16  
17 226 Supplemental Table 1. All people had a prevalence rate of 11.10%. The four PP groups'  
18  
19 227 prevalence rates were 8.92%, 9.47% (9.21%–9.73%), 10.82%, and 14.58%. In addition, the  
20  
21  
22 228 cumulative incidence rate of the overall population and four PP groups were 3532.68, 2779.24,  
23  
24  
25 229 2999.95, 3470.06, and 4701.37 per 100,000 person-years, respectively. Individuals in the Q2, Q3,  
26  
27  
28 230 and Q4 groups exhibited significantly greater cumulative incidence and prevalence rates of  
29  
30 231 Pre-DM than those in the Q1 group.

31  
32 232 The Kaplan-Meier curves for the propensity to survive without Pre-DM are shown in  
33  
34  
35 233 Supplemental Figure 1. There was a significant difference between the four PP groups regarding  
36  
37  
38 234 the likelihood of developing Pre-DM (P 0.0001). As PP levels increased, the chance of living  
39  
40  
41 235 without prediabetes steadily dropped. As a result, Pre-DM risk was highest among those in the  
42  
43  
44 236 highest PP categories.

#### 45 237 **Univariate analysis**

46  
47  
48 238 Supplemental Table 2 presents the findings of the univariate analysis. DBP, TC, BMI, SBP,  
49  
50  
51 239 FPG, age, TG, SCr, LDL-C, PP, and BUN were correlated with Pre-DM risk. HDL-C exhibits an  
52  
53  
54 240 inverse relationship with Pre-DM risk. Individuals who never drink or smoke also have a lower  
55  
56  
57 241 risk of developing pre-DM. Pre-DM risk was shown to be greater in men than in women.

#### 58 242 **The results of the connection between PP and Pre-DM**

1  
2  
3  
4 243 The Cox proportional hazard regression models for the association between PP and Pre-DM are  
5  
6 244 shown in Table 2. In the non-adjusted model, the HR (95%CI) for the relationship between  
7  
8  
9 245 Pre-DM and PP was 1.025 (1.023-1.026). The HR (95%CI) in the minimally-adjusted model was  
10  
11 246 1.013 (1.011-1.014) after adjusting for smoking status, age, BMI, family history of diabetes,  
12  
13  
14 247 gender, and drinking status. The HR (95%CI) was 1.009 (1.007-1.010) in the fully-adjusted model  
15  
16  
17 248 after controlling for smoking status, BMI, TG, ALT, TC, AST, LDL-C, BUN, HDL-C, SCr, sex,  
18  
19 249 FPG, family history of diabetes, drinking status, and age. The findings showed that for every  
20  
21  
22 250 1mmHg rise in PP, the risk of Pre-DM rose by 0.9%.

### 251 **Sensitivity analyses**

252 We used several sensitivity analyses to evaluate how reliable our results were. PP was changed  
253 from a continuous to a categorical variable before being reintroduced into the model. Following  
254 the translation of PP into categorical variables, the trend p was not equal, suggesting a potential  
255 nonlinear connection between PP and the chance of developing Pre-DM. Additionally, a GAM  
256 added the continuity covariate to the equation. Results for the GAM model showed a positive  
257 connection between PP and the probability of developing Pre-DM (HR: 1.008,  
258 95%CI:1.007-1.010) (Table 2).

259 Besides, the current research excluded participants with BMI<25kg/m<sup>2</sup> for sensitivity analysis.  
260 After controlling for confounding factors, we observed a positive association between PP and  
261 Pre-DM risk (HR: 1.011, 95%CI: 1.009-1.013) (Supplemental Table 3). Moreover, we considered  
262 participants with ages < 60 years for sensitivity studies. After adjusting for smoking status, BMI,  
263 TG, ALT, TC, AST, LDL-C, BUN, HDL-C, SCr, sex, FPG, family history of diabetes, drinking  
264 status, and age, the results showed that PP remained positively correlated with the likelihood of

1  
2  
3  
4 265 developing Pre-DM (HR: 1.008, 95%CI: 1.007-1.010). (Supplemental Table 3). According to the  
5  
6 266 sensitivity analysis, our findings appeared to be solid.  
7  
8

### 9 267 **The analysis of the nonlinear connection**

10  
11 268 The nonlinear connection between PP and incident Pre-DM is illustrated in Figure 2. After  
12  
13 269 correcting for confounding factors, there was a nonlinear link between PP and incident Pre-DM  
14  
15 270 (Table 3). Based on a two-piecewise Cox proportional hazards regression model, the PP's  
16  
17 271 inflection point was 29 mmHg (P for log-likelihood ratio test = 0.008). When PP was more than  
18  
19 272 29 mmHg, PP was strongly linked with incident Pre-DM (HR:1.009, 95%CI: 1.008-1.011,  
20  
21 273 P<0.0001). However, their correlation was not significant when PP was less than 29 mmHg (HR:  
22  
23 274 0.990, 95%CI: 0.977-1.003, P=0.1492).  
24  
25  
26  
27  
28  
29

### 30 275 **The results of the subgroup analysis**

31  
32 276 In our investigation, subgroup analysis was used to examine other risk variables that could have  
33  
34 277 altered the relationship between PP and incident prediabetes. We selected age, BMI, gender,  
35  
36 278 family history of diabetes, smoking status, and drinking status as stratification variables and  
37  
38 279 examined the changes in their impact sizes (Supplemental Table 4). Age, drinking status, and  
39  
40 280 family history of diabetes had no impact on the correlation between PP and the risk of prediabetes.  
41  
42 281 Females, never smokers, ever smokers, and subjects with BMI<25 kg/m<sup>2</sup> were more likely to be  
43  
44 282 associated with prediabetes risk. Conversely, there was a weaker connection in males, current  
45  
46 283 smokers, and individuals with BMI≥25 kg/m<sup>2</sup>.  
47  
48  
49  
50  
51  
52

### 53 284 **Discussion**

54  
55 285 The current study's main goal was to investigate the connection between PP and incident  
56  
57 286 Pre-DM in Chinese participants. The findings demonstrated a correlation between increased PP  
58  
59  
60



1  
2  
3  
4 287 and a higher risk of prediabetes. The correlation between PP and Pre-DM was also investigated on  
5  
6 288 the left and right sides of the inflection point. PP level and incident prediabetes have a nonlinear  
7  
8  
9 289 relationship. It was found that never-smokers, ever-smokers, females, and individuals with  
10  
11 290 BMI<25 kg/m<sup>2</sup> had a greater correlation between PP and incident Pre-DM.  
12  
13

14 291 PP, the arithmetic difference between SBP and DBP, is determined by arterial wall elasticity  
15  
16 292 and is related to all-cause mortality, cardiovascular events, stroke, kidney injury, severe eye  
17  
18  
19 293 illness, and arterial stiffness[23-28]. In comparison to blood pressure, PP has a better predictive  
20  
21  
22 294 capacity for poor cardiovascular outcomes in people with diabetes, according to several previous  
23  
24  
25 295 pieces of evidence[6, 29]. In addition, some studies found that PP demonstrated strong predictive  
26  
27  
28 296 ability in the homeostatic model assessment of insulin resistance index, diabetes, and metabolic  
29  
30 297 syndrome[30-32]. In a retrospective study involving 211814 Chinese participants, after controlling  
31  
32  
33 298 for BMI, smoking and drinking status, age, TC, gender, family history of diabetes, FPG, TG, and  
34  
35 299 BUN and ALT, Higher PP levels independently connect with increased T2DM risk (HR:1.003,  
36  
37 300 95%CI:1.001,1.005)[11]. In a longitudinal study involving 12272 Chinese, Zhang L et al.[30]  
38  
39  
40 301 found that high PP in Chinese women may be related to the development of T2DM after adjusting  
41  
42  
43 302 for confounding covariates. In a national cross-sectional study involving 6187 Korean older  
44  
45 303 adults, Kwon YJ et al.[32] discovered a positive association between PP and metabolic syndrome  
46  
47  
48 304 after adjusting for alcohol consumption, smoking, age, regular exercise, and mean arterial blood  
49  
50  
51 305 pressure. In another cross-sectional cohort study that included 38708 rural Chinese participants,  
52  
53 306 compared with the lowest group, the odds ratio (95%CI) of PP in the highest quartile of risk for  
54  
55  
56 307 metabolic syndrome was found to be 1.81 (1.67-1.95) after controlling for confounders[33]. In  
57  
58  
59 308 addition, in a prospective research enrolling 32917 Chinese, the HR (95%CI) for diabetes in the  
60

1  
2  
3  
4 309 Q3 and Q4 groups were 1.13 (1.04-1.22) and 1.14 (1.05-1.24), respectively, after adjusting for  
5  
6 310 covariates compared to the Q1 group[34]. However, in a multicenter, longitudinal cohort study  
7  
8 311 that included 18619 adults, high PP was not related to an increased risk of diabetes after adjusting  
9  
10 312 for BMI, mean arterial pressure, gender, high-sensitivity C reactive protein, age, exercise,  
11  
12 313 smoking, blood pressure lowering agents, drinking, hyperlipidemia, and family history of  
13  
14 314 diabetes[35]. A retrospective study of 178 individuals with hypertension found that PP was not  
15  
16 315 associated with the risk of new-onset diabetes after adjusting for potential confounders[36]. This  
17  
18 316 retrospective cohort study involved 182672 Chinese individuals and revealed a higher incidence of  
19  
20 317 prediabetes at increased PP levels. After adjusting for smoking status, BMI, TG, ALT, TC, AST,  
21  
22 318 LDL-C, BUN, HDL-C, SCr, sex, FPG, family history of diabetes, drinking status, and age, the  
23  
24 319 results indicated that each unit of the LAP raised the risk of prediabetes by 0.9%. Moreover,  
25  
26 320 sensitivity analysis has demonstrated that this correlation remains observable in Chinese adults  
27  
28 321 with age <60 years or BMI <25 kg/m<sup>2</sup>. The efforts mentioned above have demonstrated the  
29  
30 322 consistency of the connection between PP and Pre-DM risk. The findings offered a clinical  
31  
32 323 PP-level intervention guideline to decrease Pre-DM risk.

33  
34  
35  
36  
37  
38  
39  
40  
41  
42  
43 324 Few previous studies have investigated the probable curvilinear link between PP and  
44  
45 325 prediabetes. The current study first examined the nonlinear association between PP and  
46  
47 326 prediabetes. After controlling for smoking status, BMI, TG, ALT, TC, AST, LDL-C, BUN,  
48  
49 327 HDL-C, SCr, sex, FPG, family history of diabetes, drinking status, and age, the findings revealed  
50  
51 328 that the connection between PP and prediabetes was nonlinear. Based on a two-piecewise Cox  
52  
53 329 proportional hazards regression model, we identified the inflection point of PP as 29 mmHg.  
54  
55  
56 330 When PP levels exceeded 29 mmHg, a 1-unit increase in PP correlated with a 0.9% increase in the  
57  
58  
59  
60

1  
2  
3  
4 331 hazard ratio (HR) for individuals with Pre-DM (HR: 1.009, 95% CI: 1.008-1.011, P<0.0001).  
5  
6 332 However, no significant correlation was observed between PP levels below 29 mmHg and the  
7  
8  
9 333 incident Pre-DM (HR: 0.990, 95% CI: 0.977-1.003, P = 0.1492). Elevated PP serves as a valuable  
10  
11 334 indicator for identifying high-risk participants likely to develop Pre-DM during follow-up. This  
12  
13  
14 335 information can remind individuals to adopt healthier lifestyle habits sooner, ultimately improving  
15  
16  
17 336 their outcomes.

18  
19 337 The mechanism behind the association between PP and prediabetes is yet unknown. Several  
20  
21 338 explanations currently exist for PP leading to Pre-DM. Firstly, endothelial cell dysfunction may  
22  
23  
24 339 result in microvascular dysfunction[37], which in turn causes dysfunctional glucose metabolism,  
25  
26  
27 340 insulin resistance, poor tissue perfusion, and arterial stiffness[38-40]. Additionally, arterial  
28  
29  
30 341 stiffness may exacerbate microvascular lesions, creating a vicious cycle[41, 42]. Secondly, normal  
31  
32  
33 342 arteries can reduce PP, but arterial stiffness increases blood flow through low-resistance organs  
34  
35  
36 343 (such as the kidney and brain), which will cause organ dysfunction[43]. As a low-resistance,  
37  
38 344 high-blood-flow organ with a mean tissue perfusion of 250–300 ml/min/100g, the pancreas may  
39  
40  
41 345 be negatively impacted by arterial stiffness in terms of its endocrine function.

42  
43 346 The current research possesses several notable advantages. Firstly, we delved deeper into the  
44  
45  
46 347 nonlinear relationship between PP and prediabetes. Secondly, we minimized the impact of residual  
47  
48  
49 348 confounding factors through rigorous statistical adjustments. Thirdly, we conducted sensitivity  
50  
51  
52 349 analyses to ensure the robustness of our findings. Lastly, we performed a group analysis to  
53  
54  
55 350 evaluate other potential risk covariates that could affect the link between PP and Pre-DM.

56  
57 351 The present study has certain limitations. First, because we used FPG levels to diagnose  
58  
59  
60 352 Pre-DM in this investigation, we might have overlooked some new cases of Pre-DM. Second, our

1  
2  
3  
4 353 database lacks information on atherosclerosis, the use of antihypertensive medications, and the  
5  
6  
7 354 presence of hypertension. As a result, a sub-analysis based on the presence or absence of  
8  
9 355 hypertension or the use of antihypertensive drugs was not possible. Third, SBP and DBP were  
10  
11 356 only measured at baseline in the original study, and we did not assess how SBP and DBP changed  
12  
13  
14 357 over time. Future iterations of our investigation may incorporate additional confounding variables,  
15  
16  
17 358 such as variations in SBP and DBP during follow-up, hypertension, and antihypertensive  
18  
19 359 medications. Consequently, we may consider utilizing a GAM model to explore the impact of  
20  
21  
22 360 changes in PP on future Pre-DM risk.

## 361 **Conclusion**

362 This cohort study of the Chinese population shows that PP was inversely and non-linearly  
363 associated with the incidence of Pre-DM after adjusting for other confounding factors. High PP  
364 levels were related to Pre-DM risk when PP was above 29 mmHg. From a therapeutic standpoint,  
365 lowering the PP below the inflection point represents a cost-effective and straightforward  
366 approach for the early prevention and intervention of Pre-DM.

## 368 **Declarations**

### 369 **Ethics approval and consent to participate**

370 The original study followed guidelines outlined by the Helsinki Declaration and was approved by  
371 the Rich Healthcare Group Review Board, as did our secondary retrospective cohort study. The  
372 information was retrieved retrospectively and patient consent was not required.

### 373 **Consent for publication**

374 Not applicable.

## 375 **Availability of data and materials**

376 The raw data can be downloaded from the 'DATADRYAD' database ([www.Datadryad.org](http://www.Datadryad.org)).  
377 Dryad Digital Repository. <https://datadryad.org/stash/dataset/doi:10.5061/dryad.ft8750v>.

## 378 **Competing interests**

379 The authors declare that they have no competing interests.

## 380 **Funding**

381 This study was supported by the Natural Science Funding of China (No.82272598, No.81901470).

## 382 **Author contributions**

383 Changchun Cao and Yong Han contributed to the study concept and design, researched and  
384 interpreted the data, and drafted the manuscript. Haofei Hu, Yongcheng He, and Jiao Luo  
385 analyzed the data and reviewed the manuscript. Changchun Cao and Yong Han oversaw the  
386 project's progress, contributed to the discussion, and reviewed the manuscript. Haofei Hu,  
387 Yongcheng He, and Jiao Luo were the guarantors of this work. As such, they had full access to all  
388 data in the study and were responsible for the data integrity and analysis accuracy. All authors  
389 read and approved the final manuscript.

## 390 **Acknowledgments**

391 Not applicable.

392

393

394

395

396

397 **Table 1** The Baseline Characteristics of Participants

| PP                         | Q1(≤36)           | Q2(36 to ≤43)     | Q3(43 to ≤50)     | Q4(>50)           | P-value |
|----------------------------|-------------------|-------------------|-------------------|-------------------|---------|
| Participants               | 39914             | 47771             | 43811             | 51176             |         |
| Gender                     |                   |                   |                   |                   | <0.001  |
| Male                       | 16960 (42.491%)   | 22739 (47.600%)   | 24830 (56.675%)   | 32437 (63.383%)   |         |
| Female                     | 22954 (57.509%)   | 25032 (52.400%)   | 18981 (43.325%)   | 18739 (36.617%)   |         |
| Age(years)                 | 39.837 ± 9.945    | 39.905 ± 10.269   | 40.186 ± 11.236   | 43.028 ± 14.560   | <0.001  |
| Drinking status            |                   |                   |                   |                   |         |
| Current-drinker            | 526 (1.318%)      | 712 (1.490%)      | 682 (1.557%)      | 1004 (1.962%)     |         |
| Ex-drinker                 | 3923 (9.829%)     | 5436 (11.379%)    | 5777 (13.186%)    | 7498 (14.651%)    |         |
| Never- drinker             | 35465 (88.854%)   | 41623 (87.130%)   | 37352 (85.257%)   | 42674 (83.387%)   |         |
| Smoking status             |                   |                   |                   |                   | <0.001  |
| Current-smoker             | 5468 (13.699%)    | 7191 (15.053%)    | 7324 (16.717%)    | 9441 (18.448%)    |         |
| Ex-smoker                  | 1164 (2.916%)     | 1536 (3.215%)     | 1707 (3.896%)     | 2159 (4.219%)     |         |
| Never-smoker               | 33282 (83.384%)   | 39044 (81.732%)   | 34780 (79.386%)   | 39576 (77.333%)   |         |
| Family history of diabetes |                   |                   |                   |                   | <0.001  |
| No                         | 38974 (97.645%)   | 46764 (97.892%)   | 42922 (97.971%)   | 50379 (98.443%)   |         |
| Yes                        | 940 (2.355%)      | 1007 (2.108%)     | 889 (2.029%)      | 797 (1.557%)      |         |
| SBP (mmHg)                 | 104.383 ± 10.737  | 111.554 ± 10.604  | 119.000 ± 10.592  | 131.740 ± 12.760  | <0.001  |
| DBP (mmHg)                 | 73.782 ± 10.685   | 72.461 ± 10.398   | 73.164 ± 10.347   | 74.508 ± 10.733   | <0.001  |
| BMI (kg/m <sup>2</sup> )   | 22.205 ± 3.119    | 22.654 ± 3.134    | 23.100 ± 3.184    | 23.773 ± 3.358    | <0.001  |
| AST(U/L)                   | 21.2 (17, 26.6)   | 21.5 (17.2, 27)   | 22 (17.7, 27.8)   | 23(18.1, 28.7)    | <0.001  |
| ALT (U/L)                  | 16 (11.6, 24)     | 16.6(12, 25.3)    | 18 (12, 27.4)     | 19.3(14, 29)      | <0.001  |
| HDL-C (mmol/L)             | 1.394 ± 0.312     | 1.384 ± 0.310     | 1.365 ± 0.304     | 1.351 ± 0.303     | <0.001  |
| TG (mmol/L)                | 0.94 (0.67, 1.40) | 0.99 (0.70, 1.47) | 1.04 (0.72, 1.55) | 1.12 (0.79, 1.69) | <0.001  |
| LDL-C (mmol/L)             | 2.651 ± 0.656     | 2.663 ± 0.660     | 2.685 ± 0.671     | 2.734 ± 0.690     |         |
| TC (mmol/L)                | 4.617 ± 0.858     | 4.632 ± 0.863     | 4.659 ± 0.880     | 4.725 ± 0.916     | <0.001  |
| BUN (mmol/L)               | 4.502 ± 1.142     | 4.538 ± 1.148     | 4.612 ± 1.156     | 4.732 ± 1.199     | <0.001  |
| SCr (umol/L)               | 67.116 ± 14.932   | 68.284 ± 15.134   | 70.240 ± 15.137   | 72.093 ± 16.223   |         |
| FPG (mmol/L)               | 4.691 ± 0.513     | 4.730 ± 0.497     | 4.772 ± 0.480     | 4.849 ± 0.450     | <0.001  |
| PP (mmHg)                  | 30.601 ± 3.971    | 39.093 ± 1.979    | 45.836 ± 1.986    | 57.232 ± 6.395    |         |

398 Values are n (%) or mean ± SD

399 PP: pulse pressure, SBP systolic blood pressure, DBP diastolic blood pressure, BMI body mass index, ALT  
400 alanine aminotransferase, AST aspartate aminotransferase, HDL-C high-density lipoprotein cholesterol, LDL-C  
401 low-density lipoprotein cholesterol, TC total cholesterol, TG triglycerides, Scr serum creatinine, BUN blood urea  
402 nitrogen, FPG fasting plasma glucose

403

404

405

406

407

408

409

410 **Table 2** Relationship between PP and incident prediabetes in different models

| Variable      | Non-adjusted model<br>(HR,95% CI, P) | Minimally-adjusted<br>model (HR,95% CI, P) | Fully-adjusted model<br>(HR,95% CI, P) | GAM<br>(HR,95% CI, P)            |
|---------------|--------------------------------------|--------------------------------------------|----------------------------------------|----------------------------------|
| <b>Total</b>  | 1.025 (1.023, 1.026)                 | 1.013 (1.011, 1.014)                       | 1.009 (1.007, 1.010)                   | 1.008 (1.007, 1.010)             |
| PP            | <0.00001                             | <0.00001                                   | <0.00001                               | <0.00001                         |
| PP (quartile) |                                      |                                            |                                        |                                  |
| Q1            | ref                                  | ref                                        | ref                                    | ref                              |
| Q2            | 1.125 (1.077, 1.176)<br><0.00001     | 1.070 (1.024, 1.118)<br>0.00263            | 1.043 (0.998, 1.090)<br>0.06100        | 1.046 (1.001, 1.093)<br>0.04505  |
| Q3            | 1.347 (1.290, 1.407)<br><0.00001     | 1.208 (1.156, 1.262)<br><0.00001           | 1.131 (1.083, 1.181)<br><0.00001       | 1.129 (1.080, 1.179)<br><0.00001 |
| Q4            | 1.860 (1.787, 1.935)<br><0.00001     | 1.408 (1.352, 1.467)<br><0.00001           | 1.246 (1.197, 1.298)<br><0.00001       | 1.238 (1.188, 1.291)<br><0.00001 |
| P for trend   | <0.00001                             | <0.00001                                   | <0.00001                               | <0.00001                         |

411 Crude model: we did not adjust for other covariants.

412 Minimally-adjusted model: we adjusted for gender, age, family history of diabetes, drinking status, smoking status, and BMI.

413 Fully-adjusted model: we adjusted for gender, age, family history of diabetes, drinking status, smoking status, BMI, TC, TG,  
414 HDL-C, LDL-C, AST, ALT, SCr, BUN, and FPG.

415 GAM: All covariates listed in Table 1 were adjusted. However, continuous covariates were adjusted as nonlinearity.

416 HR, hazard ratios; CI, confidence interval; Ref, reference; GAM, generalized additive mode; PP, pulse pressure.

417

418

419

420

421

422

423

424

425

426

427

428

429

430

431

432

433

434

435

436

437

438

439

440

441 **Table 3** The result of the two-piecewise Cox proportional hazards regression model

| Incident prediabetes                                               | HR (95%CI)           | P       |
|--------------------------------------------------------------------|----------------------|---------|
| Fitting model by standard linear regression                        | 1.009 (1.007, 1.010) | <0.0001 |
| Fitting model by two-piecewise Cox proportional hazards regression |                      |         |
| The inflection point of PP (mmHg)                                  | 29                   |         |
| ≤29                                                                | 0.990 (0.977, 1.003) | 0.1492  |
| >29                                                                | 1.009 (1.008, 1.011) | <0.0001 |
| P for the log-likelihood ratio test                                | 0.008                |         |

442 We adjusted for gender, age, family history of diabetes, drinking status, smoking status, BMI, TC, TG, HDL-C, LDL-C, AST,

443 ALT, SCr, BUN, and FPG.

444 HR, hazard ratios; CI, confidence; PP: pulse pressure

445

446

447

448

449

450

451

452

453

454

455

456

457

458

459

460

461

462

463

464

465

466

467

468

469

470

471

471



1  
2  
3  
4 472 **Figure 1** Study Population  
5

6 473 **Figure 2** The nonlinear relationship between PP and incident prediabetes. A nonlinear  
7  
8  
9 474 relationship between PP and incident prediabetes was detected after adjusting for  
10  
11  
12 475 smoking status, BMI, TG, ALT, TC, AST, LDL-C, BUN, HDL-C, SCr, sex, FPG,  
13  
14 476 family history of diabetes, drinking status, and age.  
15

16  
17 477

18  
19 478

20 479

21 480

22  
23 481

24  
25 482

26  
27 483

28  
29 484

30  
31 485

32  
33 486

34  
35 487

36  
37 488

38  
39 489

40  
41 490

42  
43 491

44  
45 492

46  
47 493

48  
49 494

50  
51 495  
52  
53  
54  
55  
56  
57  
58  
59  
60

## References:

1. Ali MK, Bullard KM, Saydah S, Imperatore G, Gregg EW: **Cardiovascular and renal burdens of prediabetes in the USA: analysis of data from serial cross-sectional surveys, 1988-2014.** *Lancet Diabetes Endocrinol* 2018, **6**(5):392-403.
2. Yang W, Lu J, Weng J, Jia W, Ji L, Xiao J, Shan Z, Liu J, Tian H, Ji Q *et al*: **Prevalence of diabetes among men and women in China.** *N Engl J Med* 2010, **362**(12):1090-1101.
3. Li Y, Teng D, Shi X, Qin G, Qin Y, Quan H, Shi B, Sun H, Ba J, Chen B *et al*: **Prevalence of diabetes recorded in mainland China using 2018 diagnostic criteria from the American Diabetes Association: national cross sectional study.** *BMJ* 2020, **369**:m997.
4. Tabak AG, Herder C, Rathmann W, Brunner EJ, Kivimaki M: **Prediabetes: a high-risk state for diabetes development.** *LANCET* 2012, **379**(9833):2279-2290.
5. Somaratne JB, Whalley GA, Poppe KK, ter Bals MM, Wadams G, Pearl A, Bagg W, Doughty RN: **Screening for left ventricular hypertrophy in patients with type 2 diabetes mellitus in the community.** *CARDIOVASC DIABETOL* 2011, **10**:29.
6. Kodama S, Horikawa C, Fujihara K, Yoshizawa S, Yachi Y, Tanaka S, Ohara N, Matsunaga S, Yamada T, Hanyu O *et al*: **Meta-analysis of the quantitative relation between pulse pressure and mean arterial pressure and cardiovascular risk in patients with diabetes mellitus.** *AM J CARDIOL* 2014, **113**(6):1058-1065.
7. Laugesen E, Knudsen ST, Hansen KW, Rossen NB, Poulsen PL: **Invasive aortic pulse pressure is not superior to cuff pulse pressure in cardiovascular risk prediction.** *J HYPERTENS* 2020, **Publish Ahead of Print**.
8. Rojas RJ, Chavez-Sosa JV, Gutierrez-Ajalcrina R, Huancahuire-Vega S: **Association between dehydroepiandrosterone levels and cardiovascular risk in public sector health workers in a Peruvian region.** *Cardiovasc Endocrinol Metab* 2021, **10**(1):51-55.
9. Lee CJ, Yoon M, Ha J, Oh J, Park S, Lee SH, Kang SM: **Comparison of the Association Between Arterial Stiffness Indices and Heart Failure in Patients With High Cardiovascular Risk: A Retrospective Study.** *Front Cardiovasc Med* 2021, **8**:782849.
10. Acar B, Ozeke O, Karakurt M, Ozen Y, Ozbay MB, Unal S, Karanfil M, Yayla C, Cay S, Maden O *et al*: **Association of Prediabetes With Higher Coronary Atherosclerotic Burden Among Patients With First Diagnosed Acute Coronary Syndrome.** *ANGIOLOGY* 2019, **70**(2):174-180.
11. Wu C, Ma D, Chen Y: **Association of Pulse Pressure Difference and Diabetes Mellitus in Chinese People: A Cohort Study.** *Int J Gen Med* 2021, **14**:6601-6608.
12. Chen Y, Zhang XP, Yuan J, Cai B, Wang XL, Wu XL, Zhang YH, Zhang XY, Yin T, Zhu XH *et al*: **Association of body mass index and age with incident diabetes in Chinese adults: a population-based cohort study.** *BMJ OPEN* 2018, **8**(9):e21768.
13. **2. Classification and Diagnosis of Diabetes: Standards of Medical Care in Diabetes-2018.** *DIABETES CARE* 2018, **41**(Suppl 1):S13-S27.
14. Qin H, Chen Z, Zhang Y, Wang L, Ouyang P, Cheng L, Zhang Y: **Triglyceride to high-density lipoprotein cholesterol ratio is associated with incident diabetes in men: A retrospective study of Chinese individuals.** *J Diabetes Investig* 2020, **11**(1):192-198.
15. Robson ME, Tung N, Conte P, Im SA, Senkus E, Xu B, Masuda N, Delaloge S, Li W, Armstrong A *et al*: **OlympiAD final overall survival and tolerability results: Olaparib versus chemotherapy treatment of physician's choice in patients with a germline BRCA mutation and HER2-negative**

- 1  
2  
3 539 **metastatic breast cancer.** *ANN ONCOL* 2019, **30**(4):558-566.
- 4 540 16. White IR, Royston P, Wood AM: **Multiple imputation using chained equations: Issues and**  
5 541 **guidance for practice.** *STAT MED* 2011, **30**(4):377-399.
- 6 542 17. Vandembroucke JP, von Elm E, Altman DG, Gotzsche PC, Mulrow CD, Pocock SJ, Poole C,  
7 543 Schlesselman JJ, Egger M: **Strengthening the Reporting of Observational Studies in Epidemiology**  
8 544 **(STROBE): explanation and elaboration.** *INT J SURG* 2014, **12**(12):1500-1524.
- 9 545 18. Zhu F, Chen C, Zhang Y, Chen S, Huang X, Li J, Wang Y, Liu X, Deng G, Gao J: **Elevated**  
10 546 **blood mercury level has a nonlinear association with infertility in U.S. women: Data from the**  
11 547 **NHANES 2013-2016.** *REPROD TOXICOL* 2020, **91**:53-58.
- 12 548 19. Zheng X, Cao C, He Y, Wang X, Wu J, Hu H: **Association between nonalcoholic fatty liver**  
13 549 **disease and incident diabetes mellitus among Japanese: a retrospective cohort study using**  
14 550 **propensity score matching.** *LIPIDS HEALTH DIS* 2021, **20**(1):59.
- 15 551 20. Mullee A, Romaguera D, Pearson-Stuttard J, Viallon V, Stepien M, Freisling H, Fagherazzi G,  
16 552 Mancini FR, Boutron-Ruault MC, Kuhn T *et al*: **Association Between Soft Drink Consumption and**  
17 553 **Mortality in 10 European Countries.** *JAMA INTERN MED* 2019, **179**(11):1479-1490.
- 18 554 21. Keidel D, Anto JM, Basagana X, Bono R, Burte E, Carsin AE, Forsberg B, Fuertes E, Galobardes  
19 555 B, Heinrich J *et al*: **The Role of Socioeconomic Status in the Association of Lung Function and Air**  
20 556 **Pollution-A Pooled Analysis of Three Adult ESCAPE Cohorts.** *Int J Environ Res Public Health*  
21 557 2019, **16**(11).
- 22 558 22. von Elm E, Altman DG, Egger M, Pocock SJ, Gotzsche PC, Vandembroucke JP: **The**  
23 559 **Strengthening the Reporting of Observational Studies in Epidemiology (STROBE) Statement:**  
24 560 **guidelines for reporting observational studies.** *INT J SURG* 2014, **12**(12):1495-1499.
- 25 561 23. Yamamoto M, Fujihara K, Ishizawa M, Osawa T, Kaneko M, Ishiguro H, Matsubayashi Y, Seida  
26 562 H, Yamanaka N, Tanaka S *et al*: **Pulse Pressure is a Stronger Predictor Than Systolic Blood**  
27 563 **Pressure for Severe Eye Diseases in Diabetes Mellitus.** *J AM HEART ASSOC* 2019, **8**(8):e10627.
- 28 564 24. Al-Qamari A, Adeleke I, Kretzer A, Hogue CW: **Pulse pressure and perioperative stroke.** *Curr*  
29 565 *Opin Anaesthesiol* 2019, **32**(1):57-63.
- 30 566 25. Li J, Huang JY, Lo K, Zhang B, Huang YQ, Feng YQ: **Association of pulse pressure with**  
31 567 **all-cause mortality in young adults.** *POSTGRAD MED J* 2020, **96**(1138):461-466.
- 32 568 26. St-Louis E, Sudarshan M, Al-Habboubi M, El-Husseini HM, Deckelbaum DL, Razek TS,  
33 569 Feldman LS, Khwaja K: **The outcomes of the elderly in acute care general surgery.** *Eur J Trauma*  
34 570 *Emerg Surg* 2016, **42**(1):107-113.
- 35 571 27. Brown CT, Neuman MD: **Optimizing Perioperative Care for Older Adults.** *Anesthesiol Clin*  
36 572 2015, **33**(3):xv-xvi.
- 37 573 28. Gavish B, Bursztyjn M: **Ambulatory pulse pressure components: concept, determination and**  
38 574 **clinical relevance.** *J HYPERTENS* 2019, **37**(4):765-774.
- 39 575 29. Payne RA, Wilkinson IB, Webb DJ: **Arterial stiffness and hypertension: emerging concepts.**  
40 576 *HYPERTENSION* 2010, **55**(1):9-14.
- 41 577 30. Zhang L, Wang B, Wang C, Li L, Ren Y, Zhang H, Yang X, Zhao Y, Han C, Zhou J *et al*: **High**  
42 578 **pulse pressure is related to risk of type 2 diabetes mellitus in Chinese middle-aged females.** *INT J*  
43 579 *CARDIOL* 2016, **220**:467-471.
- 44 580 31. Yasuno S, Ueshima K, Oba K, Fujimoto A, Hirata M, Ogihara T, Saruta T, Nakao K: **Is pulse**  
45 581 **pressure a predictor of new-onset diabetes in high-risk hypertensive patients?: a subanalysis of**  
46 582 **the Candesartan Antihypertensive Survival Evaluation in Japan (CASE-J) trial.** *DIABETES*

- 1  
2  
3 583 *CARE* 2010, **33**(5):1122-1127.
- 4 584 32. Kwon YJ, Chung TH, Shim JY, Lee YJ: **The association of pulse pressure with metabolic**  
5 585 **syndrome in Korean elderly: A nationwide population-based study.** *Diabetes Res Clin Pract* 2017,  
6 586 **123**:75-81.
- 7 587 33. Zhang X, Li Y, Wang F, Zang J, Liu X, Zhang H, Yang K, Zhang G, Wang C: **Independent and**  
8 588 **combined effects of resting heart rate and pulse pressure with metabolic syndrome in Chinese**  
9 589 **rural population: The Henan Rural Cohort study.** *CLIN CHIM ACTA* 2018, **484**:246-252.
- 10 590 34. Li WJ, Fang W, Cai ZF, Han X, Zheng MY, Chen GZ, Wu WQ, Chen ZC, Chen YR, Wu SL:  
11 591 **[Association between pulse pressure and new-onset diabetes in hypertensive patients].** *Zhonghua*  
12 592 *Xin Xue Guan Bing Za Zhi* 2021, **49**(7):673-679.
- 13 593 35. Wu Y, Han X, Gao J, Wang Y, Zhu C, Huang Z, Xing A, Chen S, Ma Y, Zheng M *et al*:  
14 594 **Individual and combined contributions of age-specific and sex-specific pulse pressure and**  
15 595 **brachial-ankle pulse wave velocity to the risk of new-onset diabetes mellitus.** *BMJ Open Diabetes*  
16 596 *Res Care* 2021, **9**(1).
- 17 597 36. Chen JY, Chou CH, Lee YL, Tsai WC, Lin CC, Huang YY, Chen JH: **Association of central**  
18 598 **aortic pressures indexes with development of diabetes mellitus in essential hypertension.** *AM J*  
19 599 *HYPERTENS* 2010, **23**(10):1069-1073.
- 20 600 37. Muris DM, Houben AJ, Schram MT, Stehouwer CD: **Microvascular dysfunction is associated**  
21 601 **with a higher incidence of type 2 diabetes mellitus: a systematic review and meta-analysis.**  
22 602 *Arterioscler Thromb Vasc Biol* 2012, **32**(12):3082-3094.
- 23 603 38. Levy BI, Schiffrin EL, Mourad JJ, Agostini D, Vicaute E, Safar ME, Struijker-Boudier HA:  
24 604 **Impaired tissue perfusion: a pathology common to hypertension, obesity, and diabetes mellitus.**  
25 605 *CIRCULATION* 2008, **118**(9):968-976.
- 26 606 39. Vincent MA, Clerk LH, Lindner JR, Klivanov AL, Clark MG, Rattigan S, Barrett EJ:  
27 607 **Microvascular recruitment is an early insulin effect that regulates skeletal muscle glucose uptake**  
28 608 **in vivo.** *DIABETES* 2004, **53**(6):1418-1423.
- 29 609 40. Malik AR, Kondragunta V, Kullo IJ: **Forearm vascular reactivity and arterial stiffness in**  
30 610 **asymptomatic adults from the community.** *HYPERTENSION* 2008, **51**(6):1512-1518.
- 31 611 41. Malik AR, Kondragunta V, Kullo IJ: **Forearm vascular reactivity and arterial stiffness in**  
32 612 **asymptomatic adults from the community.** *HYPERTENSION* 2008, **51**(6):1512-1518.
- 33 613 42. O'Rourke MF, Hashimoto J: **Mechanical factors in arterial aging: a clinical perspective.** *J AM*  
34 614 *COLL CARDIOL* 2007, **50**(1):1-13.
- 35 615 43. Ungvari Z, Csiszar A, Kaminski PM, Wolin MS, Koller A: **Chronic high pressure-induced**  
36 616 **arterial oxidative stress: involvement of protein kinase C-dependent NAD(P)H oxidase and local**  
37 617 **renin-angiotensin system.** *AM J PATHOL* 2004, **165**(1):219-226.
- 38 618  
39 619  
40  
41  
42  
43  
44  
45  
46  
47  
48  
49  
50  
51  
52  
53  
54  
55  
56  
57  
58  
59  
60

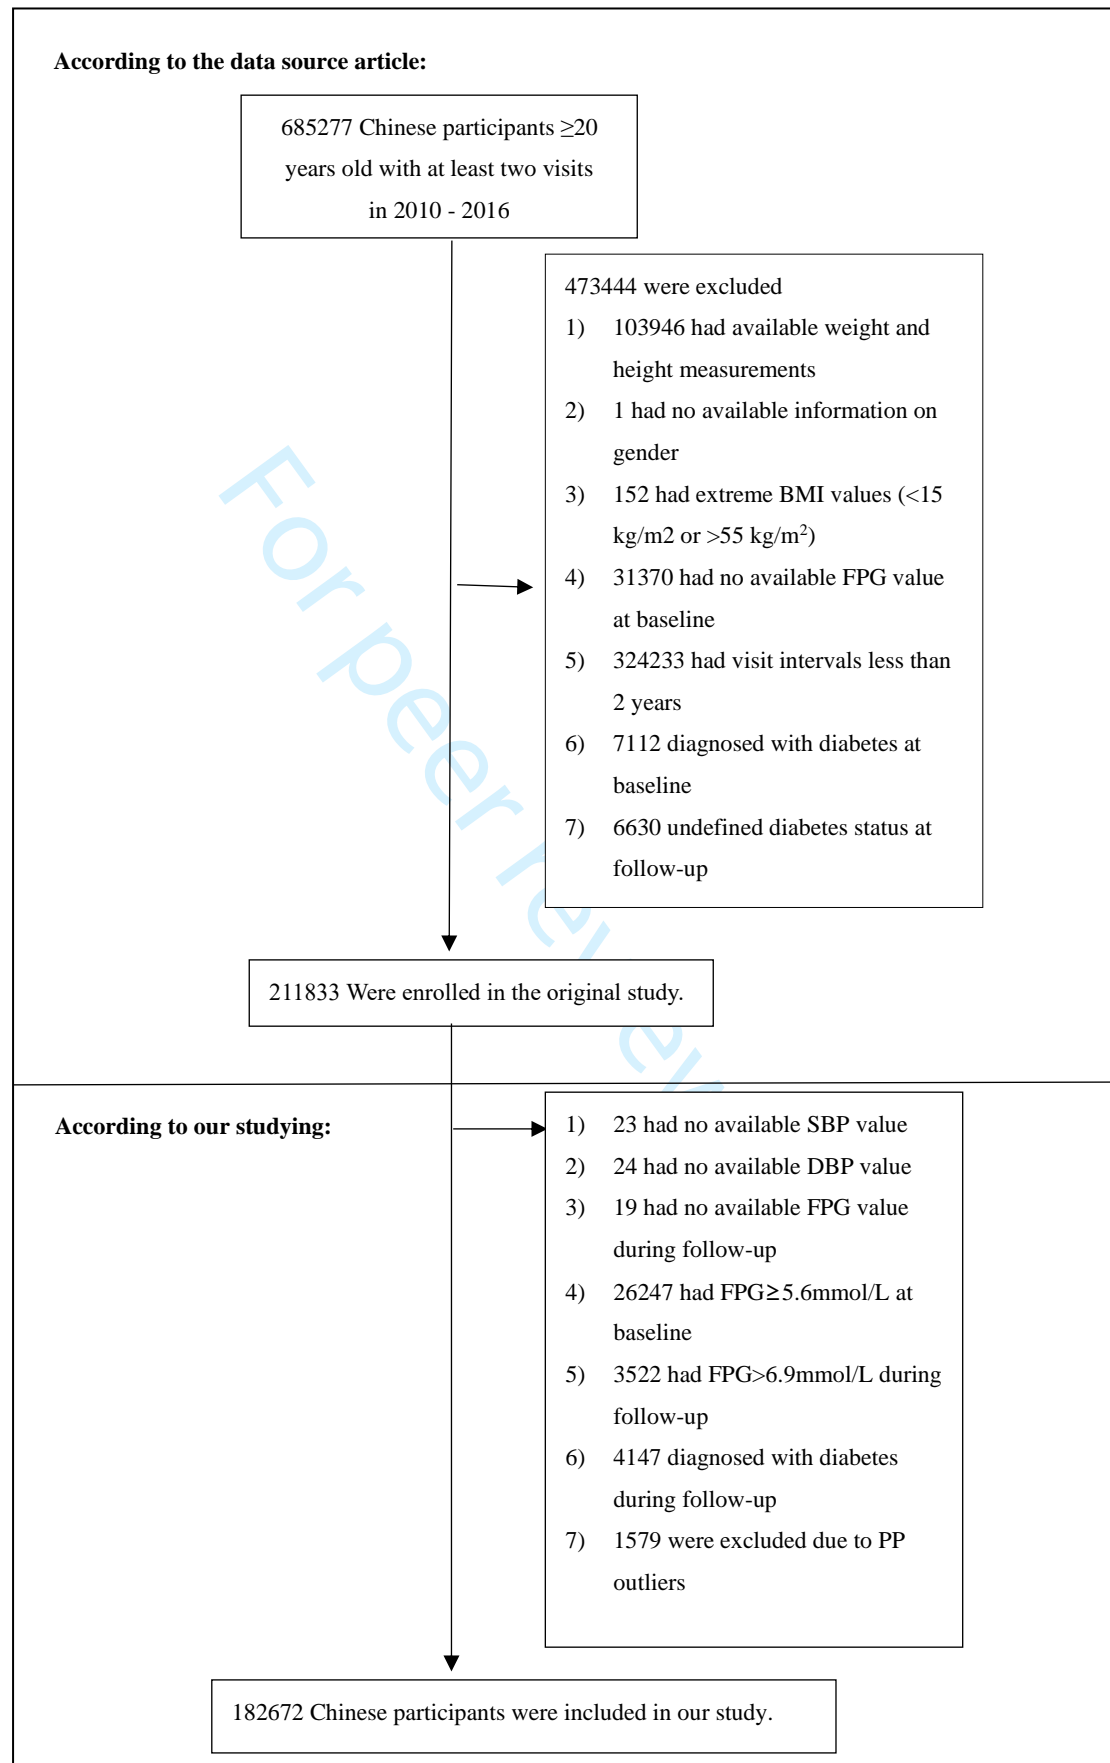

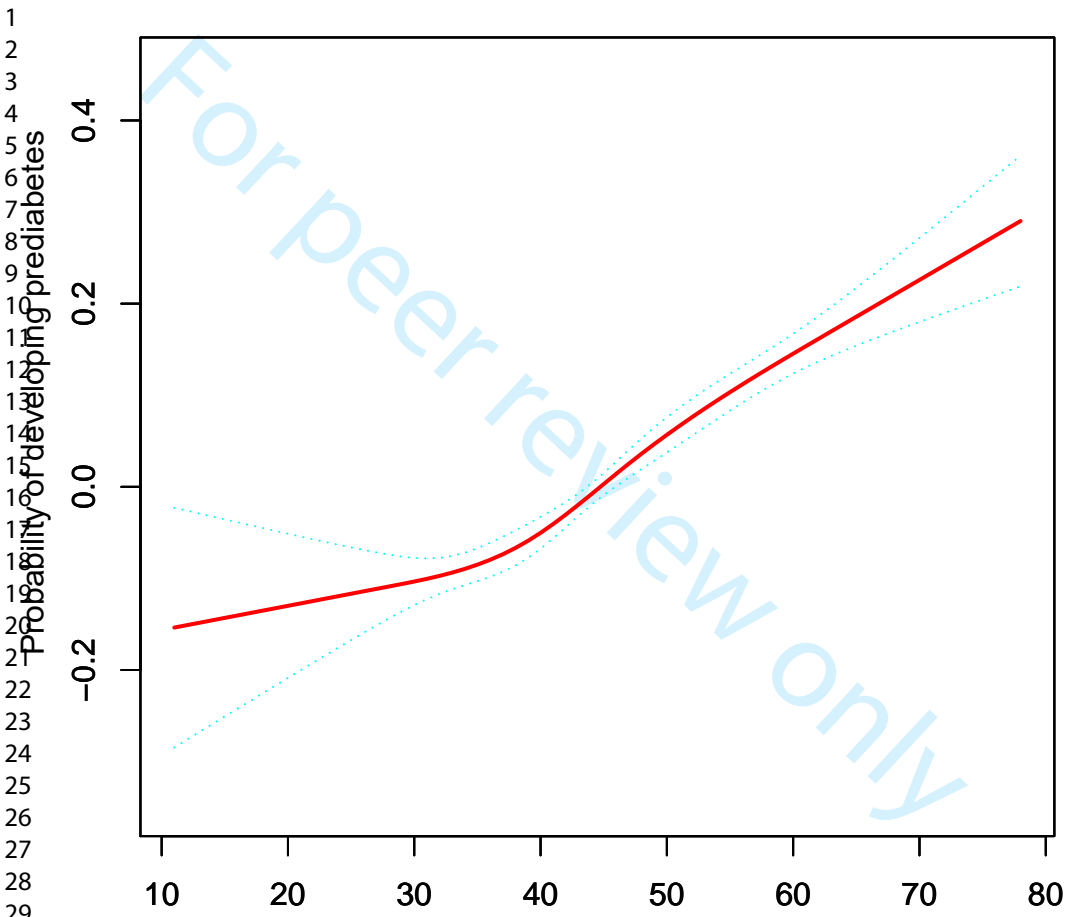

30  
31  
32

**Supplemental Table 1** Incidence rate of incident prediabetes.

| PP             | Participants<br>(n) | prediabetes events<br>(n) | Cumulative incidence (95%CI) (%) | Per 100,000<br>person-year |
|----------------|---------------------|---------------------------|----------------------------------|----------------------------|
| Total          | 182672              | 20284                     | 11.10 (10.96–11.25)              | 3532.68                    |
| Q1             | 39914               | 3560                      | 8.92(8.64–9.20)                  | 2779.24                    |
| Q2             | 47771               | 4525                      | 9.47 (9.21–9.73)                 | 2999.95                    |
| Q3             | 43811               | 4740                      | 10.82 (10.53–11.11)              | 3470.06                    |
| Q4             | 51176               | 7459                      | 14.58 (14.27–14.88)              | 4701.37                    |
| P for<br>trend |                     |                           | <0.001                           | <0.001                     |

PP: pulse pressure, CI: confidence interval

**Supplemental Table 2** The results of the univariate analysis

|                            | Statistics       | HR (95%CI)           | P value  |
|----------------------------|------------------|----------------------|----------|
| Gender                     |                  |                      | <0.0001  |
| Male                       | 96966 (53.082%)  | ref                  |          |
| Female                     | 85706 (46.918%)  | 0.627 (0.609, 0.645) | <0.00001 |
| Age(years)                 | 40.832 ± 11.864  | 1.033 (1.032, 1.034) | <0.00001 |
| Drinking status            |                  |                      |          |
| Current-drinker            | 2924 (1.601%)    | ref                  |          |
| Ex-drinker                 | 22634 (12.391%)  | 0.770 (0.701, 0.846) | <0.00001 |
| Never- drinker             | 157114 (86.009%) | 0.607 (0.556, 0.663) | <0.00001 |
| Smoking status             |                  |                      |          |
| Current-smoker             | 29424 (16.108%)  | ref                  |          |
| Ex-smoker                  | 6566 (3.594%)    | 0.896 (0.834, 0.963) | 0.00286  |
| Never-smoker               | 146682 (80.298%) | 0.714 (0.691, 0.739) | <0.00001 |
| Family history of diabetes |                  |                      | 0.3503   |
| No                         | 179039 (98.011%) | ref                  |          |
| Yes                        | 3633 (1.989%)    | 1.054 (0.965, 1.153) | 0.24372  |
| SBP (mmHg)                 | 117.428 ± 15.208 | 1.026 (1.025, 1.027) | <0.00001 |
| DBP (mmHg)                 | 73.492 ± 10.572  | 1.029 (1.028, 1.030) | <0.00001 |
| PP (mmHg)                  | 43.936 ± 10.595  | 1.025 (1.023, 1.026) | <0.00001 |
| BMI (kg/m <sup>2</sup> )   | 22.976 ± 3.259   | 1.124 (1.120, 1.129) | <0.00001 |
| AST(U/L)                   | 23.591 ± 12.164  | 1.005 (1.005, 1.006) | <0.00001 |
| ALT (U/L)                  | 23.232 ± 21.734  | 1.003 (1.003, 1.004) | <0.00001 |
| HDL-C (mmol/L)             | 1.372 ± 0.307    | 0.739 (0.707, 0.773) | <0.00001 |
| TG (mmol/L)                | 1.267 ± 0.934    | 1.200 (1.192, 1.208) | <0.00001 |
| LDL-C (mmol/L)             | 2.685 ± 0.671    | 1.280 (1.256, 1.305) | <0.00001 |
| TC (mmol/L)                | 4.661 ± 0.882    | 1.220 (1.202, 1.238) | <0.00001 |
| BUN (mmol/L)               | 4.602 ± 1.167    | 1.136 (1.124, 1.149) | <0.00001 |
| SCr (umol/L)               | 69.565 ± 15.522  | 1.006 (1.006, 1.007) | <0.00001 |
| FPG (mmol/L)               | 4.765 ± 0.487    | 5.711 (5.513, 5.916) | <0.00001 |

PP: pulse pressure, SBP systolic blood pressure, DBP diastolic blood pressure, BMI body mass index, ALT alanine aminotransferase, AST aspartate aminotransferase, HDL-C high-density lipoprotein cholesterol, LDL-C low-density lipoprotein cholesterol, TC total cholesterol, TG triglycerides, Scr serum creatinine, BUN blood urea nitrogen, FPG fasting plasma glucose



**Supplemental Table 3** Relationship between PP and prediabetes in different sensitivity analyses

| Exposure      | Model I (HR,95%CI, P)         | Model II (HR,95%CI, P)        |
|---------------|-------------------------------|-------------------------------|
| PP            | 1.011 (1.009, 1.013) <0.00001 | 1.008 (1.007, 1.010) <0.00001 |
| PP (Quintile) |                               |                               |
| Q1            | Ref                           | Ref                           |
| Q2            | 1.055 (0.999, 1.115) 0.05494  | 1.040 (0.993, 1.090) 0.09739  |
| Q3            | 1.166 (1.104, 1.232) <0.00001 | 1.123 (1.072, 1.177) <0.00001 |
| Q4            | 1.310 (1.244, 1.379) <0.00001 | 1.228 (1.175, 1.285) <0.00001 |
| P for trend   | <0.00001                      | <0.00001                      |

Model I was sensitivity analysis in participants without BMI $\geq$ 25kg/m<sup>2</sup>. We adjusted gender, age, family history of diabetes, drinking status, smoking status, TC, TG, HDL-C, LDL-C, AST, ALT, SCr, BUN, and FPG.

Model II was sensitivity analysis in participants without age $\geq$ 60 years. We adjusted gender, family history of diabetes, drinking status, smoking status, BMI, TC, TG, HDL-C, LDL-C, AST, ALT, SCr, BUN, and FPG.

HR, hazard ratios; CI, confidence; Ref: reference; PP: pulse pressure

**Supplemental Table 4** Effect size of PP on prediabetes in prespecified and exploratory subgroups

| Characteristic             | No of participants | HR (95%CI)           | P value | P for interaction |
|----------------------------|--------------------|----------------------|---------|-------------------|
| Age, years                 |                    |                      |         | 0.1335            |
| <60                        | 165813             | 1.008 (1.006, 1.009) | <0.0001 |                   |
| ≥60                        | 16859              | 1.010 (1.007, 1.013) | <0.0001 |                   |
| Gender                     |                    |                      |         | 0.0002            |
| Male                       | 96966              | 1.006 (1.004, 1.008) | <0.0001 |                   |
| Female                     | 85706              | 1.011 (1.009, 1.013) | <0.0001 |                   |
| BMI (kg/m <sup>2</sup> )   |                    |                      |         | <0.0001           |
| <25                        | 135554             | 1.012 (1.010, 1.014) | <0.0001 |                   |
| ≥25                        | 47118              | 1.006 (1.004, 1.008) | <0.0001 |                   |
| Smoking status             |                    |                      |         | 0.0075            |
| Current smoker             | 29424              | 1.005 (1.002, 1.008) | 0.0002  |                   |
| Ever smoker                | 6566               | 1.007 (1.001, 1.013) | 0.0211  |                   |
| Never smoker               | 146682             | 1.010 (1.008, 1.011) | <0.0001 |                   |
| Drinking status            |                    |                      |         | 0.2713            |
| Current drinker            | 2924               | 1.014 (1.006, 1.022) | <0.0001 |                   |
| Ever drinker               | 22634              | 1.007 (1.004, 1.010) | <0.0001 |                   |
| Never drinker              | 157114             | 1.009 (1.007, 1.010) | <0.0001 |                   |
| Family history of diabetes |                    |                      |         | 0.0618            |
| No                         | 179039             | 1.009 (1.007, 1.010) | <0.0001 |                   |
| Yes                        | 3633               | 1.001 (0.992, 1.009) | 0.9074  |                   |

Note 1: The above model was adjusted for gender, age, family history of diabetes, drinking status, smoking status, BMI, TC, TG, HDL-C, LDL-C, AST, ALT, SCr, BUN, and FPG.

Note 2: The model is not adjusted for the stratification variable in each case.

1  
2  
3  
4  
5  
6  
7  
8  
9  
10  
11  
12  
13  
14  
15  
16  
17  
18  
19  
20  
21  
22  
23  
24  
25  
26  
27  
28  
29  
30  
31  
32  
33  
34  
35  
36  
37  
38  
39  
40  
41  
42  
43  
44  
45  
46  
47  
48  
49  
50  
51  
52  
53  
54  
55  
56  
57  
58  
59  
60

For peer review only

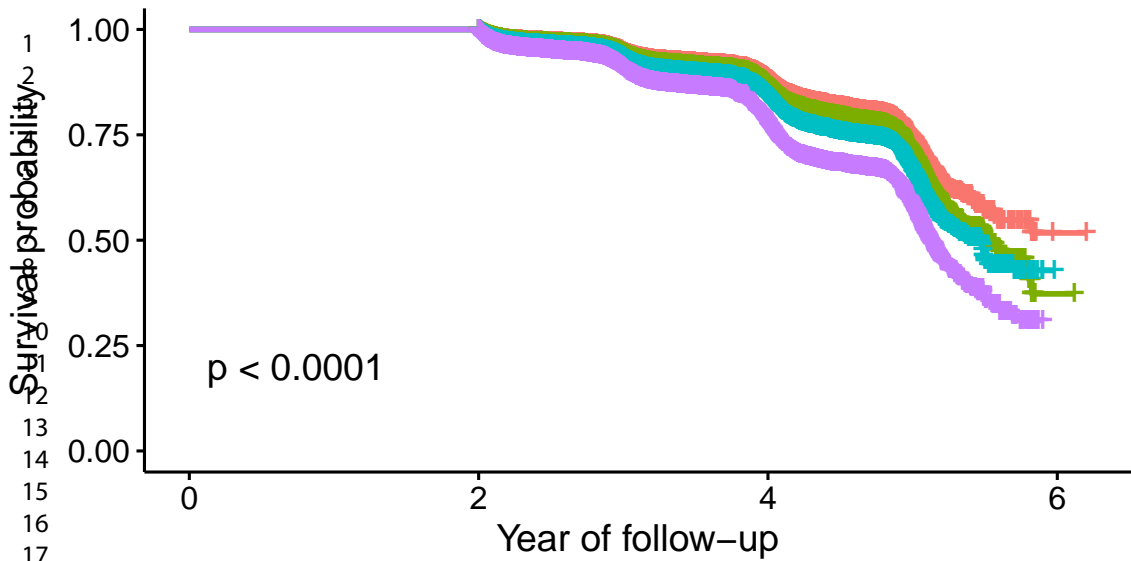

Number at risk

|    | 2     | 3     | 4     | 5    | 6 |
|----|-------|-------|-------|------|---|
| PP | 39914 | 21231 | 9935  | 2027 | 1 |
| Q1 | 47771 | 24322 | 10844 | 2155 | 1 |
| Q2 | 43811 | 21525 | 9281  | 1760 | 0 |
| Q3 | 51176 | 24666 | 10207 | 2058 | 0 |

Year of follow-up

STROBE Statement—Checklist of items that should be included in reports of *cohort studies*

|                              | Item No | Recommendation                                                                                                                                                                                                                                                                                  | Page No  |
|------------------------------|---------|-------------------------------------------------------------------------------------------------------------------------------------------------------------------------------------------------------------------------------------------------------------------------------------------------|----------|
| <b>Title and abstract</b>    | 1       | (a) Indicate the study's design with a commonly used term in the title or the abstract<br>(b) Provide in the abstract an informative and balanced summary of what was done and what was found                                                                                                   | 1<br>3-4 |
| <b>Introduction</b>          |         |                                                                                                                                                                                                                                                                                                 |          |
| Background/rationale         | 2       | Explain the scientific background and rationale for the investigation being reported                                                                                                                                                                                                            | 6        |
| Objectives                   | 3       | State specific objectives, including any prespecified hypotheses                                                                                                                                                                                                                                | 6        |
| <b>Methods</b>               |         |                                                                                                                                                                                                                                                                                                 |          |
| Study design                 | 4       | Present key elements of study design early in the paper                                                                                                                                                                                                                                         | 7        |
| Setting                      | 5       | Describe the setting, locations, and relevant dates, including periods of recruitment, exposure, follow-up, and data collection                                                                                                                                                                 | 7        |
| Participants                 | 6       | (a) Give the eligibility criteria, and the sources and methods of selection of participants. Describe methods of follow-up                                                                                                                                                                      | 7        |
|                              |         | (b) For matched studies, give matching criteria and number of exposed and unexposed                                                                                                                                                                                                             | 7        |
| Variables                    | 7       | Clearly define all outcomes, exposures, predictors, potential confounders, and effect modifiers. Give diagnostic criteria, if applicable                                                                                                                                                        | 7-8      |
| Data sources/<br>measurement | 8*      | For each variable of interest, give sources of data and details of methods of assessment (measurement). Describe comparability of assessment methods if there is more than one group                                                                                                            | 7        |
| Bias                         | 9       | Describe any efforts to address potential sources of bias                                                                                                                                                                                                                                       |          |
| Study size                   | 10      | Explain how the study size was arrived at                                                                                                                                                                                                                                                       |          |
| Quantitative variables       | 11      | Explain how quantitative variables were handled in the analyses. If applicable, describe which groupings were chosen and why                                                                                                                                                                    | 7-8      |
| Statistical methods          | 12      | (a) Describe all statistical methods, including those used to control for confounding                                                                                                                                                                                                           | 8        |
|                              |         | (b) Describe any methods used to examine subgroups and interactions                                                                                                                                                                                                                             | 10       |
|                              |         | (c) Explain how missing data were addressed                                                                                                                                                                                                                                                     | 9        |
|                              |         | (d) If applicable, explain how loss to follow-up was addressed                                                                                                                                                                                                                                  |          |
|                              |         | (e) Describe any sensitivity analyses                                                                                                                                                                                                                                                           | 9        |
| <b>Results</b>               |         |                                                                                                                                                                                                                                                                                                 |          |
| Participants                 | 13*     | (a) Report numbers of individuals at each stage of study—eg numbers potentially eligible, examined for eligibility, confirmed eligible, included in the study, completing follow-up, and analysed<br>(b) Give reasons for non-participation at each stage<br>(c) Consider use of a flow diagram | 10-11    |
| Descriptive data             | 14*     | (a) Give characteristics of study participants (eg demographic, clinical, social) and information on exposures and potential confounders                                                                                                                                                        | 10-11    |
|                              |         | (b) Indicate number of participants with missing data for each variable of interest                                                                                                                                                                                                             |          |
|                              |         | (c) Summarise follow-up time (eg, average and total amount)                                                                                                                                                                                                                                     | 10-11    |
| Outcome data                 | 15*     | Report numbers of outcome events or summary measures over time                                                                                                                                                                                                                                  | 11       |

|    |                          |    |                                                                                                                                                                                                              |       |
|----|--------------------------|----|--------------------------------------------------------------------------------------------------------------------------------------------------------------------------------------------------------------|-------|
| 1  | Main results             | 16 | (a) Give unadjusted estimates and, if applicable, confounder-adjusted estimates and their precision (eg, 95% confidence interval). Make clear which confounders were adjusted for and why they were included | 11-12 |
| 2  |                          |    | (b) Report category boundaries when continuous variables were categorized                                                                                                                                    | 12    |
| 3  |                          |    | (c) If relevant, consider translating estimates of relative risk into absolute risk for a meaningful time period                                                                                             | 12    |
| 4  |                          |    |                                                                                                                                                                                                              |       |
| 5  | Other analyses           | 17 | Report other analyses done—eg analyses of subgroups and interactions, and sensitivity analyses                                                                                                               | 12-13 |
| 6  |                          |    |                                                                                                                                                                                                              |       |
| 7  |                          |    |                                                                                                                                                                                                              |       |
| 8  |                          |    |                                                                                                                                                                                                              |       |
| 9  |                          |    |                                                                                                                                                                                                              |       |
| 10 |                          |    |                                                                                                                                                                                                              |       |
| 11 | <b>Discussion</b>        |    |                                                                                                                                                                                                              |       |
| 12 | Key results              | 18 | Summarise key results with reference to study objectives                                                                                                                                                     | 13-14 |
| 13 | Limitations              | 19 | Discuss limitations of the study, taking into account sources of potential bias or imprecision. Discuss both direction and magnitude of any potential bias                                                   | 16-17 |
| 14 | Interpretation           | 20 | Give a cautious overall interpretation of results considering objectives, limitations, multiplicity of analyses, results from similar studies, and other relevant evidence                                   | 14-16 |
| 15 | Generalisability         | 21 | Discuss the generalisability (external validity) of the study results                                                                                                                                        | 16    |
| 16 |                          |    |                                                                                                                                                                                                              |       |
| 17 |                          |    |                                                                                                                                                                                                              |       |
| 18 |                          |    |                                                                                                                                                                                                              |       |
| 19 |                          |    |                                                                                                                                                                                                              |       |
| 20 |                          |    |                                                                                                                                                                                                              |       |
| 21 | <b>Other information</b> |    |                                                                                                                                                                                                              |       |
| 22 | Funding                  | 22 | Give the source of funding and the role of the funders for the present study and, if applicable, for the original study on which the present article is based                                                | 18    |
| 23 |                          |    |                                                                                                                                                                                                              |       |
| 24 |                          |    |                                                                                                                                                                                                              |       |
| 25 |                          |    |                                                                                                                                                                                                              |       |

\*Give information separately for exposed and unexposed groups.

**Note:** An Explanation and Elaboration article discusses each checklist item and gives methodological background and published examples of transparent reporting. The STROBE checklist is best used in conjunction with this article (freely available on the Web sites of PLoS Medicine at <http://www.plosmedicine.org/>, Annals of Internal Medicine at <http://www.annals.org/>, and Epidemiology at <http://www.epidem.com/>). Information on the STROBE Initiative is available at <http://www.strobe-statement.org>.

# BMJ Open

## Nonlinear relationship between pulse pressure and the risk of prediabetes: a secondary retrospective Chinese cohort study

|                                                                                                                                                         |                                                                                                                                                                                                                                                                                                                                                                                                                                                                                                   |
|---------------------------------------------------------------------------------------------------------------------------------------------------------|---------------------------------------------------------------------------------------------------------------------------------------------------------------------------------------------------------------------------------------------------------------------------------------------------------------------------------------------------------------------------------------------------------------------------------------------------------------------------------------------------|
| Journal:                                                                                                                                                | <i>BMJ Open</i>                                                                                                                                                                                                                                                                                                                                                                                                                                                                                   |
| Manuscript ID                                                                                                                                           | bmjopen-2023-080018.R1                                                                                                                                                                                                                                                                                                                                                                                                                                                                            |
| Article Type:                                                                                                                                           | Original research                                                                                                                                                                                                                                                                                                                                                                                                                                                                                 |
| Date Submitted by the Author:                                                                                                                           | 10-Feb-2024                                                                                                                                                                                                                                                                                                                                                                                                                                                                                       |
| Complete List of Authors:                                                                                                                               | Cao, Changchun; Shenzhen Dapeng New District Nan'ao People's Hospital,<br>Han, Yong; Shenzhen Second People's Hospital, Department of Emergency<br>Hu, Haofei; Shenzhen University First Affiliated Hospital, Department of Nephrology<br>He, Yongcheng ; Shenzhen Hengsheng Hospital, Department of Nephrology; Affiliated Hospital of North Sichuan Medical College, Department of Nephrology<br>Luo, Jiao; Shenzhen Dapeng New District Nan'ao People's Hospital, Department of Rehabilitation |
| <b>Primary Subject Heading</b>:                                                                                                                         | Diabetes and endocrinology                                                                                                                                                                                                                                                                                                                                                                                                                                                                        |
| Secondary Subject Heading:                                                                                                                              | Cardiovascular medicine                                                                                                                                                                                                                                                                                                                                                                                                                                                                           |
| Keywords:                                                                                                                                               | Blood Pressure, China, General diabetes < DIABETES & ENDOCRINOLOGY                                                                                                                                                                                                                                                                                                                                                                                                                                |
| Note: The following files were submitted by the author for peer review, but cannot be converted to PDF. You must view these files (e.g. movies) online. |                                                                                                                                                                                                                                                                                                                                                                                                                                                                                                   |
| data.zsav                                                                                                                                               |                                                                                                                                                                                                                                                                                                                                                                                                                                                                                                   |

SCHOLARONE™  
Manuscripts

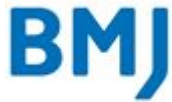

I, the Submitting Author has the right to grant and does grant on behalf of all authors of the Work (as defined in the below author licence), an exclusive licence and/or a non-exclusive licence for contributions from authors who are: i) UK Crown employees; ii) where BMJ has agreed a CC-BY licence shall apply, and/or iii) in accordance with the terms applicable for US Federal Government officers or employees acting as part of their official duties; on a worldwide, perpetual, irrevocable, royalty-free basis to BMJ Publishing Group Ltd ("BMJ") its licensees and where the relevant Journal is co-owned by BMJ to the co-owners of the Journal, to publish the Work in this journal and any other BMJ products and to exploit all rights, as set out in our [licence](#).

The Submitting Author accepts and understands that any supply made under these terms is made by BMJ to the Submitting Author unless you are acting as an employee on behalf of your employer or a postgraduate student of an affiliated institution which is paying any applicable article publishing charge ("APC") for Open Access articles. Where the Submitting Author wishes to make the Work available on an Open Access basis (and intends to pay the relevant APC), the terms of reuse of such Open Access shall be governed by a Creative Commons licence – details of these licences and which [Creative Commons](#) licence will apply to this Work are set out in our licence referred to above.

Other than as permitted in any relevant BMJ Author's Self Archiving Policies, I confirm this Work has not been accepted for publication elsewhere, is not being considered for publication elsewhere and does not duplicate material already published. I confirm all authors consent to publication of this Work and authorise the granting of this licence.



1 **Nonlinear relationship between pulse pressure and the risk of**  
2 **prediabetes: a secondary retrospective Chinese cohort study**

3 **Running title: PP and Pre-DM risk**

4 **Changchun Cao<sup>1#</sup>, Yong Han<sup>2#</sup>, Haofei Hu<sup>3\*</sup>, Yongcheng He<sup>4,5\*</sup>, Jiao Luo<sup>1\*</sup>**

5 <sup>1</sup>Department of Rehabilitation, Shenzhen Dapeng New District Nan'ao People's Hospital, Shenzhen 518000,  
6 Guangdong Province, China

7 <sup>2</sup>Department of Emergency, Shenzhen Second People's Hospital, The First Affiliated Hospital of Shenzhen  
8 University, Shenzhen 518000, Guangdong Province, China

9 <sup>3</sup>Department of Nephrology, Shenzhen Second People's Hospital, The First Affiliated Hospital of Shenzhen  
10 University, Shenzhen 518000, Guangdong Province, China

11 <sup>4</sup>Department of Nephrology, Shenzhen Hengsheng Hospital, Shenzhen 518000, Guangdong Province, China

12 <sup>5</sup>Department of Nephrology, Affiliated Hospital of North Sichuan Medical College, Nanchong, 637000, Sichuan  
13 Province, China

14  
15 Changchun Cao and Yong Han have contributed equally to this work.

16 \*Corresponding author

17 Haofei Hu

18 Department of Nephrology, The First Affiliated Hospital of Shenzhen University, Shenzhen 518000, Guangdong  
19 Province, China

20 E-mail: huhaofei0319@126.com

21 Yongcheng He

22 Department of Nephrology, Shenzhen Hengsheng Hospital, No.20 Yintian Road, Xixiang Street, Baoan District,

1  
2  
3  
4  
5  
6  
7  
8  
9  
10  
11  
12  
13  
14  
15  
16  
17  
18  
19  
20  
21  
22  
23  
24  
25  
26  
27  
28  
29  
30  
31  
32  
33  
34  
35  
36  
37  
38  
39  
40  
41  
42  
43  
44  
45  
46  
47  
48  
49  
50  
51  
52  
53  
54  
55  
56  
57  
58  
59  
60

- 23 Shenzhen 518000, Guangdong Province, China.
- 24 Department of Nephrology, Affiliated hospital of North Sichuan Medical College, No.1 Maoyuan South Road,
- 25 Nanchong, Sichuan, China.
- 26 E-mail: heyongcheng640815@126.com
- 27 Jiao Luo
- 28 Department of Rehabilitation, Shenzhen Dapeng New District Nan'ao People's Hospital, No. 6, Renmin Road,
- 29 Dapeng New District, Shenzhen 518000, Guangdong Province, China.
- 30 E-mail: luojiao1989@email.szu.edu.cn
- 31
- 32
- 33
- 34
- 35
- 36
- 37
- 38
- 39
- 40
- 41
- 42
- 43
- 44
- 45
- 46
- 47
- 48
- 49
- 50
- 51
- 52
- 53
- 54
- 55
- 56
- 57
- 58
- 59
- 60

1  
2  
3  
4 45 **Abstract**

5  
6 46 **Objective:** Previous research has shown that pulse pressure has a significant role in the start and  
7  
8  
9 47 development of type 2 diabetes mellitus. However, there is little proof that pulse pressure and  
10  
11  
12 48 prediabetes are related. Our study aimed to investigate the relationship between pulse pressure and  
13  
14  
15 49 incident prediabetes in a substantial cohort of Chinese participants.

16  
17 50 **Design:** The 'DATADRYAD' database ([www.Datadryad.org](http://www.Datadryad.org)) was used to retrieve the data for this  
18  
19  
20 51 secondary retrospective cohort analysis.

21  
22 52 **Participants:** Data from 182672 Chinese individuals who participated in the medical examination  
23  
24  
25 53 program were recorded in this retrospective cohort study between 2010 and 2016 across 32 sites  
26  
27  
28 54 and 11 cities in China.

29  
30 55 **Setting:** Pulse pressure assessed at baseline and incident prediabetes during follow-up were the  
31  
32  
33 56 target-independent and dependent variables. The association between pulse pressure and  
34  
35  
36 57 prediabetes was investigated using Cox proportional hazards regression.

37  
38 58 **Primary outcome measures:** The outcome was incident prediabetes. Impaired fasting glucose  
39  
40  
41 59 levels (fasting blood glucose between 5.6 and 6.9 mmol/L) were used to define prediabetes.

42  
43 60 **Results:** After controlling for confounding variables, pulse pressure was positively correlated with  
44  
45  
46 61 incident prediabetes among Chinese adults (HR: 1.009, 95%CI: 1.007-1.010). Additionally, at a  
47  
48  
49 62 pulse pressure inflection point of 29 mmHg, a nonlinear connection between the pulse pressure  
50  
51  
52 63 and incident prediabetes was discovered. Increased pulse pressure was an independent risk factor  
53  
54  
55 64 for developing prediabetes when pulse pressure was greater than 29 mmHg. However, their  
56  
57  
58 65 association was not significant when pulse pressure was less than 29 mmHg. According to  
59  
60 66 subgroup analyses, females, never smokers, and non-obesity correlated more significantly with

1  
2  
3  
4 67 pulse pressure and prediabetes.  
5

6 68 **Conclusion:** We discovered that higher pulse pressure independently correlated with prediabetes  
7  
8  
9 69 risk in this study of Chinese participants. The connection between pulse pressure and incident  
10  
11  
12 70 prediabetes was also nonlinear. High pulse pressure levels were related to a higher risk of  
13  
14  
15 71 prediabetes when pulse pressure was above 29 mmHg.  
16

17 72

18  
19 73

20  
21  
22 74

23  
24  
25 75

26  
27 76

28  
29  
30 77

31  
32 78

33  
34  
35 79

36  
37  
38 80

39  
40 81

41  
42  
43 82

44  
45 83

46  
47  
48 84

49  
50 85

51  
52  
53 86

54  
55  
56 87

57  
58 88

59  
60

For peer review only

1  
2  
3  
4 89 **Article Summary**  
5

6 90 **Article focus**  
7

8  
9 91 Our study investigated the relationship between PP and incident Pre-DM in a secondary  
10  
11 92 retrospective cohort of Chinese participants.  
12  
13

14 93 **Key Messages**  
15

16  
17 94 We found that elevated PP was independently associated with an increased risk of Pre-DM in our  
18  
19 95 study involving Chinese participants.  
20  
21

22 96 Higher PP levels were associated with a greater risk of developing Pre-DM when PP exceeded 29  
23  
24 97 mmHg.  
25  
26

27 98 Further investigation is needed to understand PP's impact on the incident Pre-DM.  
28  
29

30 99 **Strengths and limitations of this study**  
31

32 100 Our research leveraged a substantial sample size, drawing participants from multiple centers, thus  
33  
34 101 ensuring a robust representation of the Chinese population.  
35  
36

37 102 We elucidated a nonlinear relationship, marking the pioneering effort to pinpoint the inflection  
38  
39 103 point of PP's impact on Pre-DM.  
40  
41

42 104 Our subgroup analysis allowed us to delve into other potential risk factors within the PP and  
43  
44 105 incident Pre-DM association.  
45  
46

47  
48 106 Our study did not incorporate a 2-hour oral glucose tolerance test or glycosylated hemoglobin  
49  
50 107 level measurements, which could potentially lead to an underestimation of the incidence of  
51  
52 108 Pre-DM.  
53  
54

55  
56 109  
57

58  
59 110  
60

## 111 **Introduction**

112 Prediabetes (Pre-DM) is intermediate hyperglycemia below the diagnostic cutoff for type 2  
113 diabetes mellitus (T2DM). Patients with Pre-DM have been reported to have a higher risk for  
114 cardiovascular disease and nephropathy, indicating that impaired glucose begins to have a  
115 pathogenic effect at this early stage of diabetes[1]. The prevalence of Pre-DM is increasing  
116 globally with an aging population, urbanization, and changing lifestyles. From 2008 to 2017, the  
117 prevalence of Pre-DM in China has climbed from 15.5%[2] to 35.2%[3], creating a significant  
118 public health burden. Approximately 70% of subjects with Pre-DM will eventually get T2DM[4].  
119 Numerous studies looked for ways to pinpoint the causes of diabetes and Pre-DM to prevent and  
120 cure the disease in its earliest stages.

121 Pulse pressure (PP) is referred to as the difference between systolic blood pressure (SBP) and  
122 diastolic blood pressure (DBP). Clinically, PP is the manifestation of atherosclerosis[5].  
123 Compared to their non-diabetic contemporaries, people with T2DM have greater atherosclerosis,  
124 which results in a broad PP[5]. A greater risk of cardiovascular disease (CVD) exists in T2DM  
125 patients[6]. In addition, an increase in PP is another risk factor for CVD incidence and positively  
126 correlates with mortality[7-9]. Additionally, compared to healthy individuals, prediabetic patients  
127 have a greater burden from coronary atherosclerosis[10]. Notably, the atherosclerosis burden  
128 began to develop even before T2DM's clinical symptoms[10]. PP was found to be a significant  
129 risk factor for T2DM in a recent retrospective cohort investigation of a sizable sample[11].  
130 However, whether prediabetes in Chinese adults is associated with PP is unknown. This study  
131 sought to analyze the precise correlation between PP and the likelihood of developing Pre-DM in  
132 Chinese participants.

## 133 **Methods**

### 134 **Data source**

135 Researchers can obtain original research data for free via the Dryad Digital Repository. The  
136 Dryad data repository's data on 211833 Chinese persons was downloaded[12]. The current  
137 research employed openly available data from a medical examination program as a secondary  
138 inquiry. Researchers may use the data for secondary analysis in accordance with the Dryad terms  
139 of service without interfering with the interests of the authors.

### 140 **Study population**

141 The original study was approved by the Rich Healthcare Group Review Board. Hence, ethical  
142 approval was not required for this secondary analysis. Each participant conducted under the Rich  
143 Healthcare Group Review Board, gave their written informed permission before taking part[12].  
144 In addition, the Declaration of Helsinki was followed during our research. The necessary  
145 standards and legislation were followed in the execution of all procedures, including the  
146 declarations in the Declarations section.

147 Individuals were excluded from the investigation under these conditions: (1) diabetes at  
148 baseline; (2) diabetes or not defined diabetes status at follow-up; (3) abnormal body mass index  
149 (BMI) values (BMI over 55 or less than 15 kg/m<sup>2</sup>); (4) lacking data on baseline fasting plasma  
150 glucose (FPG), FPG at follow-up, height, DBP, gender, weight, and SBP; (5) FPG>6.9mmol/L  
151 during follow-up and FPG≥5.6mmol/L at baseline; (6) follow-up interval < 2 years; (7) PP outliers  
152 (three standard deviations above or below the mean). Finally, 182672 subjects eventually entered  
153 the study. The study's design and participant flow are shown in Figure 1.

### 154 **Data collection**

1  
2  
3  
4 155 Trained staff members gathered and compiled all of the data. Data from laboratory inspections  
5  
6  
7 156 were gathered in the original study under uniform conditions using standardized handling  
8  
9 157 procedures. The skilled personnel, including height, blood pressure, body weight, and age,  
10  
11  
12 158 gathered demographic information. Professional trainees without light clothing and shoes measure  
13  
14 159 individuals for weight and height. Weight/Height<sup>2</sup> (kg/m<sup>2</sup>) was used to compute BMI. Trained  
15  
16  
17 160 staff members took blood pressure using a standard mercury sphygmomanometer. A Beckman  
18  
19  
20 161 5800 autoanalyzer was used to measure laboratory data, such as low-density lipoprotein  
21  
22 162 cholesterol (LDL-C), FPG, total cholesterol (TC), aspartate aminotransferase (AST), blood urea  
23  
24  
25 163 nitrogen (BUN), triglyceride (TG), alanine aminotransferase (ALT), serum creatinine (Scr), and  
26  
27 164 high-density lipoprotein cholesterol (HDL-C). SBP (mmHg) - (DBP (mmHg)) were the formulas  
28  
29  
30 165 used to compute PP.

### 31 32 166 **Diagnosis of Pre-DM**

33  
34  
35 167 Impaired fasting glucose levels (FPG between 5.6 and 6.9 mmol/L) were used to define  
36  
37  
38 168 Pre-DM[13].

### 39 40 169 **Patient and Public Involvement**

41  
42  
43 170 Given this was a secondary retrospective cohort study, no patient was involved in the study.

### 44 45 171 **Statistical analysis**

46  
47  
48 172 R software version 3.4.3 and EmpowerStats (R) version 4.0 were used for all statistical  
49  
50  
51 173 analyses.

52  
53 174 We initially assessed the baseline data distribution by categorizing it into quartiles based on the  
54  
55  
56 175 PP ( $Q1 \leq 36$ ;  $36 < Q2 \leq 43$ ;  $43 < Q3 \leq 50$ ;  $50 < Q4$ ). Continuous data were reported as medians with  
57  
58  
59 176 interquartile ranges (25th-75th percentile) or means with standard deviations (SD), while  
60



1  
2  
3  
4 177 categorical data were expressed as frequencies and percentages. The Kruskal-Wallis H test,  
5  
6 178 chi-square test, and one-way ANOVA were employed to assess disparities between PP groups.  
7  
8  
9 179 The cumulative incidence and terms person-year were used to represent incidence rates[14].  
10  
11 180 Comparisons of survival and cumulative event rates were done using the Kaplan-Meier method.  
12  
13  
14 181 Using the log-rank test, we also examined the Kaplan-Meier hazard ratios (HR) of unfavorable  
15  
16  
17 182 events [15].

18  
19 183 There were 133257 (72.32%), 4240 (2.30%), 1541 (0.84%), 4209 (2.28%), 107684 (58.44%),  
20  
21  
22 184 82879 (44.98%), 18563 (10.07%), 83382 (45.25%), 9759 (5.30%) and 133257 (72.32%)  
23  
24  
25 185 individuals with missing data for smoking status, TG, ALT, TC, AST, LDL-C, BUN, HDL-C,  
26  
27 186 SCr, and drinking status, respectively. The present study employed multiple imputations to handle  
28  
29  
30 187 the missing data of covariants. The imputation model included smoking status, BMI, TG, ALT,  
31  
32  
33 188 TC, AST, LDL-C, BUN, HDL-C, SCr, FPG, sex, family history of diabetes, drinking status, and  
34  
35 189 age. Processes for missing data analysis employ the assumption of missing at random[16].

36  
37  
38 190 This analysis assessed each factor's impact on incident Pre-DM using univariate Cox  
39  
40  
41 191 proportional hazards regression models. The multivariate Cox regression analysis also examined  
42  
43  
44 192 the precise connection between the PP and incident Pre-DM. In addition, we created three models  
45  
46  
47 193 (fully-adjusted, minimally-adjusted, and non-adjusted) to evaluate the connection between PP and  
48  
49  
50 194 incident Pre-DM. Suppose the HR is changed by at least 10% after the covariance is included in  
51  
52  
53 195 the model. At this point, the covariance should be adjusted[17].

54  
55  
56 196 The current analysis conducted several sensitivity analyses to determine if the findings were  
57  
58  
59 197 trustworthy. We converted PP into a categorical variable based on the quartile. We computed the  
60  
198 P for the trend to verify the outcomes of the PP as the continuous variable and test for

1  
2  
3  
4 199 nonlinearity. Obesity and older adults were connected to a greater occurrence of Pre-DM. Thus,  
5  
6 200 we excluded individuals with BMI  $\geq 25\text{kg/m}^2$  or age  $\geq 60$  years for subsequent sensitivity  
7  
8  
9 201 analyses to examine the connection between PP and Pre-DM risk. Additionally, we incorporated  
10  
11 202 the continuous covariate as a curve to the equation using a generalized additive model (GAM) to  
12  
13  
14 203 confirm the validity of the results. We also calculated E-values to examine the possibility of  
15  
16  
17 204 unmeasured confounding between PP and the risk of prediabetes

18  
19 205 We used Cox proportional hazards regression with cubic spline functions and smooth curve  
20  
21  
22 206 fitting to explore the nonlinear relationship between PP and Pre-DM. We first utilized a recursive  
23  
24  
25 207 technique to locate the inflection point if a non-linear relationship was discovered[18]. The  
26  
27  
28 208 recursive algorithm commences with an arbitrary initialization and subsequently undergoes a  
29  
30  
31 209 series of filtering and smoothing steps in order to identify the inflection point accurately.  
32  
33 210 Following this, we construct a two-piece Cox proportional hazards regression model, separately  
34  
35  
36 211 analyzing the data on either side of the inflection point. Ultimately, the study determined the most  
37  
38 212 appropriate model for PP's connection with Pre-DM through log-likelihood ratio analysis.

39  
40 213 Subgroup analysis, utilizing the Cox proportional hazard model, was also conducted. Firstly,  
41  
42  
43 214 these variables were selected based on a combination of clinical relevance, literature review, and  
44  
45  
46 215 the availability of data within our cohort. Secondly, the interaction test between these variables  
47  
48  
49 216 and PP was performed before the subgroup analysis. The likelihood ratio test was used to compare  
50  
51  
52 217 models with and without the multiplicative interaction term. Secondly, stratification was  
53  
54  
55 218 performed based on medians or established clinical cut points[19], and variables such as age ( $<60$ ,  
56  
57 219  $\geq 60$  years) and BMI ( $<25$ ,  $\geq 25$  kg/m<sup>2</sup>) were converted into categorical factors. Thirdly, a fully  
58  
59 220 adjusted analysis was performed for each stratum, except for the stratification factor. Ultimately,  
60

1  
2  
3  
4 221 the likelihood ratio test was used to determine whether interaction terms existed in models with  
5  
6 222 and without interaction terms[20, 21]. The study adhered to the STROBE statement for all  
7  
8  
9 223 outcomes[17, 22]. Statistical significance was determined by a P-value < 0.05, using two-tailed  
10  
11  
12 224 tests.

## 14 225 **Results**

### 16 226 **Characteristics of individuals**

17  
18  
19 227 In the current research, 182672 individuals deemed free of Pre-DM at baseline were included.  
20  
21  
22 228 The average age was  $40.832 \pm 11.864$  years, and 53.082% of individuals were male. Twenty  
23  
24 229 thousand two hundred eighty-four individuals eventually got Pre-DM after an average of 3.143  
25  
26  
27 230 years of follow-up. Table 1 displays comprehensive clinical measurements, biochemical tests, and  
28  
29  
30 231 various parameters. We categorized participants into subgroups based on PP quartiles ( $Q1 \leq 36$ ;  
31  
32 232  $36 < Q2 \leq 43$ ;  $43 < Q3 \leq 50$ ;  $50 < Q4$ ). Compared to the Q1 group, the other groups (Q2 group, Q3  
33  
34  
35 233 group, Q4 group) had higher ALT, BMI, age, TG, Scr, TC, AST, BUN, LDL-C, and lower  
36  
37  
38 234 HDL-C. Additionally, the Q4 group had a higher proportion of men, smokers, and drinkers.

### 39 235 **The incidence rate of Pre-DM**

40  
41  
42 236 During the follow-up, 20284 individuals developed incident Pre-DM, as outlined in  
43  
44  
45 237 Supplemental Table 1. All people had a prevalence rate of 11.10%. The four PP groups'  
46  
47  
48 238 prevalence rates were 8.92%, 9.47% (9.21%–9.73%), 10.82%, and 14.58%. In addition, the  
49  
50  
51 239 cumulative incidence rate of the overall population and four PP groups were 3532.68, 2779.24,  
52  
53 240 2999.95, 3470.06, and 4701.37 per 100,000 person-years, respectively. Individuals in the Q2, Q3,  
54  
55  
56 241 and Q4 groups exhibited significantly greater cumulative incidence and prevalence rates of  
57  
58  
59 242 Pre-DM than those in the Q1 group.  
60

1  
2  
3  
4 243 The Kaplan-Meier curves for the propensity to survive without Pre-DM are shown in  
5  
6 244 Supplemental Figure 1. There was a significant difference between the four PP groups regarding  
7  
8  
9 245 the likelihood of developing Pre-DM ( $P<0.0001$ ). As PP levels increased, the chance of living  
10  
11 246 without prediabetes steadily dropped. As a result, Pre-DM risk was highest among those in the  
12  
13  
14 247 highest PP categories.

### 17 248 **Univariate analysis**

19 249 Supplemental Table 2 presents the findings of the univariate analysis. DBP, TC, BMI, SBP,  
20  
21  
22 250 FPG, age, TG, SCr, LDL-C, PP, and BUN were correlated with Pre-DM risk. HDL-C exhibits an  
23  
24  
25 251 inverse relationship with Pre-DM risk. Individuals who never drink or smoke also have a lower  
26  
27 252 risk of developing pre-DM. Pre-DM risk was shown to be greater in men than in women.

### 30 253 **The results of the connection between PP and Pre-DM**

32 254 The Cox proportional hazard regression models for the association between PP and Pre-DM are  
33  
34  
35 255 shown in Table 2. In the non-adjusted model, the HR (95%CI) for the relationship between  
36  
37  
38 256 Pre-DM and PP was 1.025 (1.023-1.026). The HR (95%CI) in the minimally-adjusted model was  
39  
40  
41 257 1.013 (1.011-1.014) after adjusting for smoking status, age, BMI, family history of diabetes,  
42  
43 258 gender, and drinking status. The HR (95%CI) was 1.009 (1.007-1.010) in the fully-adjusted model  
44  
45  
46 259 after controlling for smoking status, BMI, TG, ALT, TC, AST, LDL-C, BUN, HDL-C, SCr, sex,  
47  
48 260 FPG, family history of diabetes, drinking status, and age. The findings showed that for every  
49  
50  
51 261 1mmHg rise in PP, the risk of Pre-DM rose by 0.9%.

### 53 262 **Sensitivity analyses**

56 263 We used several sensitivity analyses to evaluate how reliable our results were. PP was changed  
57  
58 264 from a continuous to a categorical variable before being reintroduced into the model. Following  
59  
60

1  
2  
3  
4 265 the translation of PP into categorical variables, the trend p was not equal, suggesting a potential  
5  
6 266 nonlinear connection between PP and the chance of developing Pre-DM. Additionally, a GAM  
7  
8  
9 267 added the continuity covariate to the equation. Results for the GAM model showed a positive  
10  
11  
12 268 connection between PP and the probability of developing Pre-DM (HR: 1.008,  
13  
14 269 95%CI:1.007-1.010) (Table 2).

17 270 Besides, the current research excluded participants with BMI<25kg/m<sup>2</sup> for sensitivity analysis.  
18  
19 271 After controlling for confounding factors, we observed a positive association between PP and  
20  
21  
22 272 Pre-DM risk (HR: 1.011, 95%CI: 1.009-1.013) (Supplemental Table 3). Moreover, we considered  
23  
24 273 participants with ages < 60 years for sensitivity studies. After adjusting for smoking status, BMI,  
25  
26  
27 274 TG, ALT, TC, AST, LDL-C, BUN, HDL-C, SCr, sex, FPG, family history of diabetes, drinking  
28  
29  
30 275 status, and age, the results showed that PP remained positively correlated with the likelihood of  
31  
32  
33 276 developing Pre-DM (HR: 1.008, 95%CI: 1.007-1.010). (Supplemental Table 3). According to the  
34  
35 277 sensitivity analysis, our findings appeared to be solid.

37 278 Additionally, an E-value was computed to assess the vulnerability of the study results to  
38  
39 279 potential unobserved confounding factors. The resulting E-value (1.21) demonstrated a higher  
40  
41  
42 280 level of statistical significance in comparison to the relative risk (1.05) associated with  
43  
44 281 unmeasured confounders and PP. This suggests that the impact of unmeasured or unidentified  
45  
46  
47 282 confounders on the relationship between PP and the occurrence of Pre-DM was negligible.

### 283 **The analysis of the nonlinear connection**

52  
53 284 The nonlinear connection between PP and incident Pre-DM is illustrated in Figure 2. After  
54  
55  
56 285 correcting for confounding factors, there was a nonlinear link between PP and incident Pre-DM  
57  
58  
59 286 (Table 3). Based on a two-piecewise Cox proportional hazards regression model, the PP's  
60

1  
2  
3  
4 287 inflection point was 29 mmHg (P for log-likelihood ratio test = 0.008). When PP was more than  
5  
6  
7 288 29 mmHg, PP was strongly linked with incident Pre-DM (HR:1.009, 95%CI: 1.008-1.011,  
8  
9 289 P<0.0001). However, their correlation was not significant when PP was less than 29 mmHg (HR:  
10  
11 290 0.990, 95%CI: 0.977-1.003, P=0.1492).

### 14 291 **The results of the subgroup analysis**

17 292 Interaction tests performed before subgroup analyses showed that age, BMI, gender, family  
18  
19 293 history of diabetes, smoking status, and drinking status interacted with PP (P<0.001)  
20  
21  
22 294 (Supplemental Table 4). We selected age, BMI, gender, family history of diabetes, smoking status,  
23  
24  
25 295 and drinking status as stratification variables and examined the changes in their impact sizes  
26  
27 296 (Supplemental Table 5). Age, drinking status, and family history of diabetes had no impact on the  
28  
29  
30 297 correlation between PP and the risk of prediabetes. Females, never smokers, ever smokers, and  
31  
32 298 subjects with BMI<25 kg/m<sup>2</sup> were more likely to be associated with prediabetes risk. Conversely,  
33  
34  
35 299 there was a weaker connection in males, current smokers, and individuals with BMI≥25 kg/m<sup>2</sup>.

### 37 300 **Discussion**

40 301 The current study's main goal was to investigate the connection between PP and incident  
41  
42 302 Pre-DM in Chinese participants. The findings demonstrated a correlation between increased PP  
43  
44  
45 303 and a higher risk of prediabetes. The correlation between PP and Pre-DM was also investigated on  
46  
47  
48 304 the left and right sides of the inflection point. PP level and incident prediabetes have a nonlinear  
49  
50  
51 305 relationship. It was found that never-smokers, ever-smokers, females, and individuals with  
52  
53 306 BMI<25 kg/m<sup>2</sup> had a greater correlation between PP and incident Pre-DM.

56 307 PP, the arithmetic difference between SBP and DBP, is determined by arterial wall elasticity  
57  
58 308 and is related to all-cause mortality, cardiovascular events, stroke, kidney injury, severe eye  
59  
60

1  
2  
3  
4 309 illness, and arterial stiffness[23-28]. In comparison to blood pressure, PP has a better predictive  
5  
6 310 capacity for poor cardiovascular outcomes in people with diabetes, according to several previous  
7  
8  
9 311 pieces of evidence[6, 29]. In addition, some studies found that PP demonstrated strong predictive  
10  
11 312 ability in the homeostatic model assessment of insulin resistance index, diabetes, and metabolic  
12  
13  
14 313 syndrome[30-32]. In a retrospective study involving 211814 Chinese participants, after controlling  
15  
16  
17 314 for BMI, smoking and drinking status, age, TC, gender, family history of diabetes, FPG, TG, and  
18  
19  
20 315 BUN and ALT, Higher PP levels independently connect with increased T2DM risk (HR:1.003,  
21  
22 316 95%CI:1.001,1.005)[11]. In a longitudinal study involving 12272 Chinese, Zhang L et al.[30]  
23  
24  
25 317 found that high PP in Chinese women may be related to the development of T2DM after adjusting  
26  
27  
28 318 for confounding covariates. In a national cross-sectional study involving 6187 Korean older  
29  
30  
31 319 adults, Kwon YJ et al.[32] discovered a positive association between PP and metabolic syndrome  
32  
33 320 after adjusting for alcohol consumption, smoking, age, regular exercise, and mean arterial blood  
34  
35  
36 321 pressure. In another cross-sectional cohort study that included 38708 rural Chinese participants,  
37  
38  
39 322 compared with the lowest group, the odds ratio (95%CI) of PP in the highest quartile of risk for  
40  
41  
42 323 metabolic syndrome was found to be 1.81 (1.67-1.95) after controlling for confounders[33]. In  
43  
44  
45 324 addition, in a prospective research enrolling 32917 Chinese, the HR (95%CI) for diabetes in the  
46  
47  
48 325 Q3 and Q4 groups were 1.13 (1.04-1.22) and 1.14 (1.05-1.24), respectively, after adjusting for  
49  
50  
51 326 covariates compared to the Q1 group[34]. However, in a multicenter, longitudinal cohort study  
52  
53  
54 327 that included 18619 adults, high PP was not related to an increased risk of diabetes after adjusting  
55  
56  
57 328 for BMI, mean arterial pressure, gender, high-sensitivity C reactive protein, age, exercise,  
58  
59  
60 329 smoking, blood pressure lowering agents, drinking, hyperlipidemia, and family history of  
330 diabetes[35]. A retrospective study of 178 individuals with hypertension found that PP was not

1  
2  
3  
4 331 associated with the risk of new-onset diabetes after adjusting for potential confounders[36]. This  
5  
6 332 retrospective cohort study involved 182672 Chinese individuals and revealed a higher incidence of  
7  
8  
9 333 prediabetes at increased PP levels. After adjusting for smoking status, BMI, TG, ALT, TC, AST,  
10  
11 334 LDL-C, BUN, HDL-C, SCr, sex, FPG, family history of diabetes, drinking status, and age, the  
12  
13  
14 335 results indicated that each unit of the LAP raised the risk of prediabetes by 0.9%. Moreover,  
15  
16  
17 336 sensitivity analysis has demonstrated that this correlation remains observable in Chinese adults  
18  
19 337 with age <60 years or BMI <25 kg/m<sup>2</sup>. The efforts mentioned above have demonstrated the  
20  
21  
22 338 consistency of the connection between PP and Pre-DM risk. The findings offered a clinical  
23  
24  
25 339 PP-level intervention guideline to decrease Pre-DM risk.

26  
27 340 Few previous studies have investigated the probable curvilinear link between PP and  
28  
29  
30 341 prediabetes. The current study first examined the nonlinear association between PP and  
31  
32  
33 342 prediabetes. After controlling for smoking status, BMI, TG, ALT, TC, AST, LDL-C, BUN,  
34  
35  
36 343 HDL-C, SCr, sex, FPG, family history of diabetes, drinking status, and age, the findings revealed  
37  
38 344 that the connection between PP and prediabetes was nonlinear. Based on a two-piecewise Cox  
39  
40  
41 345 proportional hazards regression model, we identified the inflection point of PP as 29 mmHg.  
42  
43 346 When PP levels exceeded 29 mmHg, a 1-unit increase in PP correlated with a 0.9% increase in the  
44  
45  
46 347 hazard ratio (HR) for individuals with Pre-DM (HR: 1.009, 95% CI: 1.008-1.011, P<0.0001).  
47  
48 348 However, no significant correlation was observed between PP levels below 29 mmHg and the  
49  
50  
51 349 incident Pre-DM (HR: 0.990, 95% CI: 0.977-1.003, P = 0.1492). Elevated PP serves as a valuable  
52  
53  
54 350 indicator for identifying high-risk participants likely to develop Pre-DM during follow-up.  
55  
56 351 Moreover, our analysis revealed that the relationship between PP and the emergence of Pre-DM  
57  
58  
59 352 was more pronounced in never-smokers, ever-smokers, females, and individuals with BMI< 25  
60



1  
2  
3  
4 353 kg/m<sup>2</sup>. In contrast, this association appeared attenuated in males, current smokers, and individuals  
5  
6  
7 354 with BMI  $\geq$  25 kg/m<sup>2</sup>. Prior research has consistently identified obesity, smoking, and male as  
8  
9 355 contributors to insulin resistance[37, 38], which is a precursor to Pre-DM. We postulated that the  
10  
11 356 attenuated association observed in these subgroups may be attributable to the overriding influence  
12  
13  
14 357 of these risk factors on the pathogenesis of Pre-DM. The direct impact of PP on prediabetes risk  
15  
16  
17 358 may be somewhat eclipsed by the more substantial effects of obesity, active smoking, and the  
18  
19 359 male sex on insulin resistance and subsequent Pre-DM development. This information can remind  
20  
21  
22 360 individuals to adopt healthier lifestyle habits sooner, ultimately improving their outcomes.  
23  
24

25 361 The mechanism behind the association between PP and prediabetes is yet unknown. Several  
26  
27 362 explanations currently exist for PP leading to Pre-DM. Firstly, endothelial cell dysfunction may  
28  
29  
30 363 result in microvascular dysfunction[39], which in turn causes dysfunctional glucose metabolism,  
31  
32  
33 364 insulin resistance, poor tissue perfusion, and arterial stiffness[40-42]. Additionally, arterial  
34  
35 365 stiffness may exacerbate microvascular lesions, creating a vicious cycle[43, 44]. Secondly, normal  
36  
37  
38 366 arteries can reduce PP, but arterial stiffness increases blood flow through low-resistance organs  
39  
40  
41 367 (such as the kidney and brain), which will cause organ dysfunction[45]. As a low-resistance,  
42  
43 368 high-blood-flow organ with a mean tissue perfusion of 250–300 ml/min/100g, the pancreas may  
44  
45 369 be negatively impacted by arterial stiffness in terms of its endocrine function.  
46  
47

48 370 The current research possesses several notable advantages. Firstly, we delved deeper into the  
49  
50  
51 371 nonlinear relationship between PP and prediabetes. Secondly, we minimized the impact of residual  
52  
53 372 confounding factors through rigorous statistical adjustments. Thirdly, we conducted sensitivity  
54  
55  
56 373 analyses to ensure the robustness of our findings. Lastly, we performed a group analysis to  
57  
58  
59 374 evaluate other potential risk covariates that could affect the link between PP and Pre-DM.  
60

1  
2  
3  
4 375 The present study has certain limitations. First, this study is based on a Chinese population, and  
5  
6 376 while it offers valuable insights, the findings might not be directly generalizable to other  
7  
8  
9 377 populations due to genetic, lifestyle, and environmental differences. In the future, we will explore  
10  
11 378 the relationship between PP and prediabetes risk in diverse populations. Second, as our study was  
12  
13  
14 379 a secondary analysis, we cannot guarantee data quality monitoring and variable control. In  
15  
16  
17 380 forthcoming research endeavors, we will endeavor to construct prospective cohort studies with  
18  
19 381 enhanced data quality oversight and variable control, thereby mitigating bias. Third, the original  
20  
21  
22 382 study excluded people with diabetes at baseline or those with missing data, which may have  
23  
24  
25 383 affected the representativeness of the sample. In the future, we will design our own study in a  
26  
27 384 more diverse population to validate our findings. Fourth, prediabetes was defined based on  
28  
29 385 impaired fasting glucose levels in our study. This could potentially lead to underestimation of  
30  
31  
32 386 prediabetes incidence. This is a secondary retrospective study, and the raw data did not provide  
33  
34  
35 387 information regarding 2-hour oral glucose tolerance test or glycosylated hemoglobin level  
36  
37  
38 388 measurements. In the future, we will consider designing our study to document more variables,  
39  
40 389 including 2-hour oral glucose tolerance test or glycosylated hemoglobin level measurements.  
41  
42  
43 390 Fifth, as with all observational studies, there may be uncontrolled or unmeasured confounding  
44  
45 391 factors, such as diet, exercise, atherosclerosis, the use of antihypertensive medications, and the  
46  
47  
48 392 presence of hypertension, despite controlling for known potential confounders like BMI, TC,  
49  
50  
51 393 LDL-C, AST, ALT, Scr, BUN, and FPG. However, we used the E-value to evaluate the impact of  
52  
53 394 unmeasured confounders and determined it unlikely that they fully explained the results. Sixth,  
54  
55  
56 395 SBP and DBP were only measured at baseline in the original study, and we did not assess how  
57  
58 396 SBP and DBP changed over time. In the future, we will consider designing our own study and  
59  
60

1  
2  
3  
4 397 documenting more information, such as diet, exercise, atherosclerosis, antihypertensive  
5  
6 398 medications, the presence of hypertension and changes in blood pressure over time, and then  
7  
8  
9 399 utilizing a GAM model to explore the impact of changes in PP on Pre-DM risk.  
10

## 11 400 **Conclusion**

12  
13  
14 401 This cohort study of the Chinese population shows that PP was inversely and non-linearly  
15  
16 402 associated with the incidence of Pre-DM after adjusting for other confounding factors. High PP  
17  
18 403 levels were related to Pre-DM risk when PP was above 29 mmHg. From a therapeutic standpoint,  
19  
20 404 lowering the PP below the inflection point represents a cost-effective and straightforward  
21  
22 405 approach for the early prevention and intervention of Pre-DM.  
23  
24  
25  
26  
27  
28  
29

## 30 407 **Declarations**

### 31 408 **Ethics approval and consent to participate**

32  
33  
34 409 The original study followed guidelines outlined by the Helsinki Declaration and was approved by  
35  
36 410 the Rich Healthcare Group Review Board. In addition, the Rich Healthcare Group Review Board  
37  
38 411 has waived informed consent for the current retrospective study. All methods were performed in  
39  
40 412 accordance with the relevant the Declaration of Helsinki.  
41  
42  
43  
44

### 45 413 **Consent for publication**

46  
47 414 Not applicable.  
48  
49

### 50 415 **Availability of data and materials**

51  
52 416 The authors confirm that the data supporting the findings of this study are available within the  
53  
54 417 article [and/or its supplementary materials].  
55  
56  
57

### 58 418 **Competing interests**

1  
2  
3  
4 419 The authors declare that they have no competing interests.  
5

6  
7 420 **Funding**  
8

9 421 This study was supported by the Natural Science Funding of China (No.82272598, No.81901470),  
10  
11 422 and the Natural Science Foundation of Guangdong Province, China (No. 2020A1515011203).  
12

13  
14 423 This study was also supported by the Science, Technology and Innovation Commission of  
15  
16 424 Shenzhen (JCYJ20210324135804012, JCYJ20220530150407015).  
17

18  
19 425 **Author contributions**  
20

21  
22 426 Changchun Cao and Yong Han contributed to the study concept and design, researched and  
23  
24 427 interpreted the data, and drafted the manuscript. Haofei Hu, Yongcheng He, and Jiao Luo  
25  
26 428 analyzed the data and reviewed the manuscript. Changchun Cao and Yong Han oversaw the  
27  
28 429 project's progress, contributed to the discussion, and reviewed the manuscript. Haofei Hu,  
29  
30 430 Yongcheng He, and Jiao Luo were the guarantors of this work. As such, they had full access to all  
31  
32 431 data in the study and were responsible for the data integrity and analysis accuracy. All authors  
33  
34 432 read and approved the final manuscript.  
35  
36  
37  
38  
39

40 433 **Acknowledgments**  
41

42 434 Not applicable.  
43  
44  
45  
46  
47  
48  
49  
50  
51  
52  
53  
54  
55  
56  
57  
58  
59  
60

441 **Table 1** The Baseline Characteristics of Participants

| PP                         | Q1(≤36)           | Q2(36 to ≤43)     | Q3(43 to ≤50)     | Q4(>50)           | P-value |
|----------------------------|-------------------|-------------------|-------------------|-------------------|---------|
| Participants               | 39914             | 47771             | 43811             | 51176             |         |
| Gender                     |                   |                   |                   |                   | <0.001  |
| Male                       | 16960 (42.491%)   | 22739 (47.600%)   | 24830 (56.675%)   | 32437 (63.383%)   |         |
| Female                     | 22954 (57.509%)   | 25032 (52.400%)   | 18981 (43.325%)   | 18739 (36.617%)   |         |
| Age(years)                 | 39.837 ± 9.945    | 39.905 ± 10.269   | 40.186 ± 11.236   | 43.028 ± 14.560   | <0.001  |
| Drinking status            |                   |                   |                   |                   |         |
| Current-drinker            | 526 (1.318%)      | 712 (1.490%)      | 682 (1.557%)      | 1004 (1.962%)     |         |
| Ex-drinker                 | 3923 (9.829%)     | 5436 (11.379%)    | 5777 (13.186%)    | 7498 (14.651%)    |         |
| Never- drinker             | 35465 (88.854%)   | 41623 (87.130%)   | 37352 (85.257%)   | 42674 (83.387%)   |         |
| Smoking status             |                   |                   |                   |                   | <0.001  |
| Current-smoker             | 5468 (13.699%)    | 7191 (15.053%)    | 7324 (16.717%)    | 9441 (18.448%)    |         |
| Ex-smoker                  | 1164 (2.916%)     | 1536 (3.215%)     | 1707 (3.896%)     | 2159 (4.219%)     |         |
| Never-smoker               | 33282 (83.384%)   | 39044 (81.732%)   | 34780 (79.386%)   | 39576 (77.333%)   |         |
| Family history of diabetes |                   |                   |                   |                   | <0.001  |
| No                         | 38974 (97.645%)   | 46764 (97.892%)   | 42922 (97.971%)   | 50379 (98.443%)   |         |
| Yes                        | 940 (2.355%)      | 1007 (2.108%)     | 889 (2.029%)      | 797 (1.557%)      |         |
| SBP (mmHg)                 | 104.383 ± 10.737  | 111.554 ± 10.604  | 119.000 ± 10.592  | 131.740 ± 12.760  | <0.001  |
| DBP (mmHg)                 | 73.782 ± 10.685   | 72.461 ± 10.398   | 73.164 ± 10.347   | 74.508 ± 10.733   | <0.001  |
| BMI (kg/m <sup>2</sup> )   | 22.205 ± 3.119    | 22.654 ± 3.134    | 23.100 ± 3.184    | 23.773 ± 3.358    | <0.001  |
| AST(U/L)                   | 21.2 (17, 26.6)   | 21.5 (17.2, 27)   | 22 (17.7, 27.8)   | 23(18.1, 28.7)    | <0.001  |
| ALT (U/L)                  | 16 (11.6, 24)     | 16.6(12, 25.3)    | 18 (12, 27.4)     | 19.3(14, 29)      | <0.001  |
| HDL-C (mmol/L)             | 1.394 ± 0.312     | 1.384 ± 0.310     | 1.365 ± 0.304     | 1.351 ± 0.303     | <0.001  |
| TG (mmol/L)                | 0.94 (0.67, 1.40) | 0.99 (0.70, 1.47) | 1.04 (0.72, 1.55) | 1.12 (0.79, 1.69) | <0.001  |
| LDL-C (mmol/L)             | 2.651 ± 0.656     | 2.663 ± 0.660     | 2.685 ± 0.671     | 2.734 ± 0.690     | <0.001  |
| TC (mmol/L)                | 4.617 ± 0.858     | 4.632 ± 0.863     | 4.659 ± 0.880     | 4.725 ± 0.916     | <0.001  |
| BUN (mmol/L)               | 4.502 ± 1.142     | 4.538 ± 1.148     | 4.612 ± 1.156     | 4.732 ± 1.199     | <0.001  |
| SCr (umol/L)               | 67.116 ± 14.932   | 68.284 ± 15.134   | 70.240 ± 15.137   | 72.093 ± 16.223   | <0.001  |
| FPG (mmol/L)               | 4.691 ± 0.513     | 4.730 ± 0.497     | 4.772 ± 0.480     | 4.849 ± 0.450     | <0.001  |
| PP (mmHg)                  | 30.601 ± 3.971    | 39.093 ± 1.979    | 45.836 ± 1.986    | 57.232 ± 6.395    | <0.001  |

442 Values are n (%) or mean ± SD

443 PP: pulse pressure, SBP systolic blood pressure, DBP diastolic blood pressure, BMI body mass index, ALT

444 alanine aminotransferase, AST aspartate aminotransferase, HDL-C high-density lipoprotein cholesterol, LDL-C

445 low-density lipoprotein cholesterol, TC total cholesterol, TG triglycerides, Scr serum creatinine, BUN blood urea

446 nitrogen, FPG fasting plasma glucose

447

448

449

450

451

452

453

454 **Table 2** Relationship between PP and incident prediabetes in different models

| Variable                      | Non-adjusted<br>model (HR,95%<br>CI, P) | Minimally-adjusted<br>model (HR,95% CI,<br>P) | Fully-adjusted model<br>(HR,95% CI, P) | GAM<br>(HR,95% CI, P)            |
|-------------------------------|-----------------------------------------|-----------------------------------------------|----------------------------------------|----------------------------------|
| <b>Total</b>                  | 1.025 (1.023,<br>1.026) <0.00001        | 1.013 (1.011, 1.014)                          | 1.009 (1.007, 1.010)                   | 1.008 (1.007,<br>1.010) <0.00001 |
| PP                            |                                         | <0.00001                                      | <0.00001                               |                                  |
| PP (quartile)                 |                                         |                                               |                                        |                                  |
| Q1                            | ref                                     | ref                                           | ref                                    | ref                              |
| Q2                            | 1.125 (1.077,<br>1.176) <0.00001        | 1.070 (1.024, 1.118)<br>0.00263               | 1.043 (0.998, 1.090)<br>0.06100        | 1.046 (1.001,<br>1.093) 0.04505  |
| Q3                            | 1.347 (1.290,<br>1.407) <0.00001        | 1.208 (1.156, 1.262)<br><0.00001              | 1.131 (1.083, 1.181)<br><0.00001       | 1.129 (1.080,<br>1.179) <0.00001 |
| Q4                            | 1.860 (1.787,<br>1.935) <0.00001        | 1.408 (1.352, 1.467)<br><0.00001              | 1.246 (1.197, 1.298)<br><0.00001       | 1.238 (1.188,<br>1.291) <0.00001 |
| P for trend                   | <0.00001                                | <0.00001                                      | <0.00001                               | <0.00001                         |
| Gender                        |                                         |                                               |                                        |                                  |
| Male                          |                                         | ref                                           | ref                                    |                                  |
| Female                        |                                         | 0.777 (0.751, 0.803)<br><0.00001              | 0.877 (0.843, 0.913)<br><0.00001       |                                  |
| Age(years)                    |                                         | 1.027 (1.026, 1.028)<br><0.00001              | 1.022 (1.021, 1.023)<br><0.00001       |                                  |
| Drinking status               |                                         |                                               |                                        |                                  |
| Current-drinker               |                                         | ref                                           | ref                                    |                                  |
| Ex-drinker                    |                                         | 0.965 (0.877, 1.061)<br>0.45670               | 1.013 (0.920, 1.114)<br>0.79930        |                                  |
| Never- drinker                |                                         | 0.911 (0.832, 0.997)<br>0.04199               | 1.075 (0.981, 1.178)<br>0.12156        |                                  |
| Smoking status                |                                         |                                               |                                        |                                  |
| Current-smoke                 |                                         | ref                                           | ref                                    |                                  |
| Ex-smoker                     |                                         | 1.020 (0.948, 1.097)<br>0.59573               | 1.021 (0.949, 1.098)<br>0.57792        |                                  |
| Never-smoker                  |                                         | 1.055 (1.016, 1.095)<br>0.00534               | 1.023 (0.985, 1.062)<br>0.24610        |                                  |
| Family history of<br>diabetes |                                         |                                               |                                        |                                  |
| No                            |                                         | ref                                           | ref                                    |                                  |
| Yes                           |                                         | 1.157 (1.058, 1.265)<br>0.00142               | 1.120 (1.024, 1.225)<br>0.01278        |                                  |
| BMI (kg/m <sup>2</sup> )      |                                         | 1.091 (1.086, 1.095)<br><0.00001              | 1.060 (1.055, 1.065)<br><0.00001       |                                  |
| AST(U/L)                      |                                         |                                               | 0.999 (0.997, 1.000)<br>0.15002        |                                  |
| ALT (U/L)                     |                                         |                                               | 1.003 (1.002, 1.004)                   |                                  |

|  |              |                      |
|--|--------------|----------------------|
|  |              | <0.00001             |
|  | HDL-C        | 1.429 (1.353, 1.509) |
|  | (mmol/L)     | <0.00001             |
|  | TG (mmol/L)  | 1.145 (1.129, 1.161) |
|  |              | <0.00001             |
|  | LDL-C        | 1.309 (1.248, 1.373) |
|  | (mmol/L)     | <0.00001             |
|  | TC (mmol/L)  | 0.772 (0.741, 0.803) |
|  |              | <0.00001             |
|  | BUN (mmol/L) | 0.976 (0.964, 0.988) |
|  |              | 0.00014              |
|  | SCr (umol/L) | 1.003 (1.002, 1.004) |
|  |              | <0.00001             |
|  | FPG (mmol/L) | 4.613 (4.451, 4.780) |
|  |              | <0.00001             |

455 Crude model: we did not adjust for other covariants.

456 Minimally-adjusted model: we adjusted for gender, age, family history of diabetes, drinking status, smoking status, and BMI.

457 Fully-adjusted model: we adjusted for gender, age, family history of diabetes, drinking status, smoking status, BMI, TC, TG,  
458 HDL-C, LDL-C, AST, ALT, SCr, BUN, and FPG.

459 GAM: All covariates listed in Table 1 were adjusted. However, continuous covariates were adjusted as nonlinearity.

460 HR, hazard ratios; CI, confidence interval; Ref, reference; GAM, generalized additive mode; PP, pulse pressure.

461

462

463

464

465

466

467

468

469

470

471

472

473

474

475

476

477

478

479

480

481

482

483

484 **Table 3** The result of the two-piecewise Cox proportional hazards regression model

| Incident prediabetes                                               | HR (95%CI)           | P       |
|--------------------------------------------------------------------|----------------------|---------|
| Fitting model by standard linear regression                        | 1.009 (1.007, 1.010) | <0.0001 |
| Fitting model by two-piecewise Cox proportional hazards regression |                      |         |
| The inflection point of PP (mmHg)                                  | 29                   |         |
| ≤29                                                                | 0.990 (0.977, 1.003) | 0.1492  |
| >29                                                                | 1.009 (1.008, 1.011) | <0.0001 |
| P for the log-likelihood ratio test                                | 0.008                |         |

485 We adjusted for gender, age, family history of diabetes, drinking status, smoking status, BMI, TC, TG, HDL-C, LDL-C, AST,

486 ALT, SCr, BUN, and FPG.

487 HR, hazard ratios; CI, confidence; PP: pulse pressure

488

489

490

491

492

493

494

495

496

497

498

499

500

501

502

503

504

505

506

507

508

509

510

511

512

513

514



1  
2  
3  
4 515 **Figure 1** Study Population  
5

6 516 **Figure 2** The nonlinear relationship between PP and incident prediabetes. A nonlinear  
7  
8  
9 517 relationship between PP and incident prediabetes was detected after adjusting for  
10  
11  
12 518 smoking status, BMI, TG, ALT, TC, AST, LDL-C, BUN, HDL-C, SCr, sex, FPG,  
13  
14 519 family history of diabetes, drinking status, and age.  
15  
16

17 520

18  
19 521

20 522

21 523

22 524

23  
24  
25 525

26  
27 526

28  
29  
30 527

31  
32 528

33  
34  
35 529

36  
37  
38 530

39  
40 531

41  
42  
43 532

44  
45 533

46  
47  
48 534

49  
50 535

51  
52 536

53  
54  
55 537

56  
57  
58 538

59  
60

## References:

1. Ali MK, Bullard KM, Saydah S, Imperatore G, Gregg EW: **Cardiovascular and renal burdens of prediabetes in the USA: analysis of data from serial cross-sectional surveys, 1988-2014.** *LANCET DIABETES ENDO* 2018, **6**(5):392-403.
2. Yang W, Lu J, Weng J, Jia W, Ji L, Xiao J, Shan Z, Liu J, Tian H, Ji Q *et al*: **Prevalence of diabetes among men and women in China.** *NEW ENGL J MED* 2010, **362**(12):1090-1101.
3. Li Y, Teng D, Shi X, Qin G, Qin Y, Quan H, Shi B, Sun H, Ba J, Chen B *et al*: **Prevalence of diabetes recorded in mainland China using 2018 diagnostic criteria from the American Diabetes Association: national cross sectional study.** *BMJ-BRIT MED J* 2020, **369**:m997.
4. Tabak AG, Herder C, Rathmann W, Brunner EJ, Kivimaki M: **Prediabetes: a high-risk state for diabetes development.** *LANCET* 2012, **379**(9833):2279-2290.
5. Somaratne JB, Whalley GA, Poppe KK, ter Bals MM, Wadams G, Pearl A, Bagg W, Doughty RN: **Screening for left ventricular hypertrophy in patients with type 2 diabetes mellitus in the community.** *CARDIOVASC DIABETOL* 2011, **10**:29.
6. Kodama S, Horikawa C, Fujihara K, Yoshizawa S, Yachi Y, Tanaka S, Ohara N, Matsunaga S, Yamada T, Hanyu O *et al*: **Meta-analysis of the quantitative relation between pulse pressure and mean arterial pressure and cardiovascular risk in patients with diabetes mellitus.** *AM J CARDIOL* 2014, **113**(6):1058-1065.
7. Laugesen E, Knudsen ST, Hansen KW, Rossen NB, Poulsen PL: **Invasive aortic pulse pressure is not superior to cuff pulse pressure in cardiovascular risk prediction.** *J HYPERTENS* 2020, **Publish Ahead of Print**.
8. Rojas RJ, Chavez-Sosa JV, Gutierrez-Ajalcrina R, Huancahuire-Vega S: **Association between dehydroepiandrosterone levels and cardiovascular risk in public sector health workers in a Peruvian region.** *CARDIOVASC ENDOCR ME* 2021, **10**(1):51-55.
9. Lee CJ, Yoon M, Ha J, Oh J, Park S, Lee SH, Kang SM: **Comparison of the Association Between Arterial Stiffness Indices and Heart Failure in Patients With High Cardiovascular Risk: A Retrospective Study.** *FRONT CARDIOVASC MED* 2021, **8**:782849.
10. Acar B, Ozeke O, Karakurt M, Ozen Y, Ozbay MB, Unal S, Karanfil M, Yayla C, Cay S, Maden O *et al*: **Association of Prediabetes With Higher Coronary Atherosclerotic Burden Among Patients With First Diagnosed Acute Coronary Syndrome.** *ANGIOLOGY* 2019, **70**(2):174-180.
11. Wu C, Ma D, Chen Y: **Association of Pulse Pressure Difference and Diabetes Mellitus in Chinese People: A Cohort Study.** *INT J GEN MED* 2021, **14**:6601-6608.
12. Chen Y, Zhang XP, Yuan J, Cai B, Wang XL, Wu XL, Zhang YH, Zhang XY, Yin T, Zhu XH *et al*: **Association of body mass index and age with incident diabetes in Chinese adults: a population-based cohort study.** *BMJ OPEN* 2018, **8**(9):e21768.
13. **2. Classification and Diagnosis of Diabetes: Standards of Medical Care in Diabetes-2018.** *DIABETES CARE* 2018, **41**(Suppl 1):S13-S27.
14. Qin H, Chen Z, Zhang Y, Wang L, Ouyang P, Cheng L, Zhang Y: **Triglyceride to high-density lipoprotein cholesterol ratio is associated with incident diabetes in men: A retrospective study of Chinese individuals.** *J DIABETES INVEST* 2020, **11**(1):192-198.
15. Robson ME, Tung N, Conte P, Im SA, Senkus E, Xu B, Masuda N, Delaloge S, Li W, Armstrong A *et al*: **OlympiAD final overall survival and tolerability results: Olaparib versus chemotherapy treatment of physician's choice in patients with a germline BRCA mutation and HER2-negative**

- 1  
2  
3 582 **metastatic breast cancer.** *ANN ONCOL* 2019, **30**(4):558-566.
- 4 583 16. White IR, Royston P, Wood AM: **Multiple imputation using chained equations: Issues and**  
5 584 **guidance for practice.** *STAT MED* 2011, **30**(4):377-399.
- 6 585 17. Vandembroucke JP, von Elm E, Altman DG, Gotzsche PC, Mulrow CD, Pocock SJ, Poole C,  
7 586 Schlesselman JJ, Egger M: **Strengthening the Reporting of Observational Studies in Epidemiology**  
8 587 **(STROBE): explanation and elaboration.** *INT J SURG* 2014, **12**(12):1500-1524.
- 9 588 18. Zhu F, Chen C, Zhang Y, Chen S, Huang X, Li J, Wang Y, Liu X, Deng G, Gao J: **Elevated**  
10 589 **blood mercury level has a non-linear association with infertility in U.S. women: Data from the**  
11 590 **NHANES 2013-2016.** *REPROD TOXICOL* 2020, **91**:53-58.
- 12 591 19. Zheng X, Cao C, He Y, Wang X, Wu J, Hu H: **Association between nonalcoholic fatty liver**  
13 592 **disease and incident diabetes mellitus among Japanese: a retrospective cohort study using**  
14 593 **propensity score matching.** *LIPIDS HEALTH DIS* 2021, **20**(1):59.
- 15 594 20. Mullee A, Romaguera D, Pearson-Stuttard J, Viallon V, Stepien M, Freisling H, Fagherazzi G,  
16 595 Mancini FR, Boutron-Ruault MC, Kuhn T *et al*: **Association Between Soft Drink Consumption and**  
17 596 **Mortality in 10 European Countries.** *JAMA INTERN MED* 2019, **179**(11):1479-1490.
- 18 597 21. Keidel D, Anto JM, Basagana X, Bono R, Burte E, Carsin AE, Forsberg B, Fuertes E, Galobardes  
19 598 B, Heinrich J *et al*: **The Role of Socioeconomic Status in the Association of Lung Function and Air**  
20 599 **Pollution-A Pooled Analysis of Three Adult ESCAPE Cohorts.** *INT J ENV RES PUB HE* 2019,  
21 600 **16**(11).
- 22 601 22. von Elm E, Altman DG, Egger M, Pocock SJ, Gotzsche PC, Vandembroucke JP: **The**  
23 602 **Strengthening the Reporting of Observational Studies in Epidemiology (STROBE) Statement:**  
24 603 **guidelines for reporting observational studies.** *INT J SURG* 2014, **12**(12):1495-1499.
- 25 604 23. Yamamoto M, Fujihara K, Ishizawa M, Osawa T, Kaneko M, Ishiguro H, Matsubayashi Y, Seida  
26 605 H, Yamanaka N, Tanaka S *et al*: **Pulse Pressure is a Stronger Predictor Than Systolic Blood**  
27 606 **Pressure for Severe Eye Diseases in Diabetes Mellitus.** *J AM HEART ASSOC* 2019, **8**(8):e10627.
- 28 607 24. Al-Qamari A, Adeleke I, Kretzer A, Hogue CW: **Pulse pressure and perioperative stroke.**  
29 608 *CURR OPIN ANESTHESIO* 2019, **32**(1):57-63.
- 30 609 25. Li J, Huang JY, Lo K, Zhang B, Huang YQ, Feng YQ: **Association of pulse pressure with**  
31 610 **all-cause mortality in young adults.** *POSTGRAD MED J* 2020, **96**(1138):461-466.
- 32 611 26. St-Louis E, Sudarshan M, Al-Habboubi M, El-Husseini HM, Deckelbaum DL, Razek TS,  
33 612 Feldman LS, Khwaja K: **The outcomes of the elderly in acute care general surgery.** *EUR J*  
34 613 *TRAUMA EMERG S* 2016, **42**(1):107-113.
- 35 614 27. Brown CT, Neuman MD: **Optimizing Perioperative Care for Older Adults.** *Anesthesiol Clin*  
36 615 2015, **33**(3):xv-xvi.
- 37 616 28. Gavish B, Bursztyjn M: **Ambulatory pulse pressure components: concept, determination and**  
38 617 **clinical relevance.** *J HYPERTENS* 2019, **37**(4):765-774.
- 39 618 29. Payne RA, Wilkinson IB, Webb DJ: **Arterial stiffness and hypertension: emerging concepts.**  
40 619 *HYPERTENSION* 2010, **55**(1):9-14.
- 41 620 30. Zhang L, Wang B, Wang C, Li L, Ren Y, Zhang H, Yang X, Zhao Y, Han C, Zhou J *et al*: **High**  
42 621 **pulse pressure is related to risk of type 2 diabetes mellitus in Chinese middle-aged females.** *INT J*  
43 622 *CARDIOL* 2016, **220**:467-471.
- 44 623 31. Yasuno S, Ueshima K, Oba K, Fujimoto A, Hirata M, Ogihara T, Saruta T, Nakao K: **Is pulse**  
45 624 **pressure a predictor of new-onset diabetes in high-risk hypertensive patients?: a subanalysis of**  
46 625 **the Candesartan Antihypertensive Survival Evaluation in Japan (CASE-J) trial.** *DIABETES*

- 1  
2  
3 626 *CARE* 2010, **33**(5):1122-1127.
- 4 627 32. Kwon YJ, Chung TH, Shim JY, Lee YJ: **The association of pulse pressure with metabolic**  
5 628 **syndrome in Korean elderly: A nationwide population-based study.** *DIABETES RES CLIN PR*  
6 629 2017, **123**:75-81.
- 7 630 33. Zhang X, Li Y, Wang F, Zang J, Liu X, Zhang H, Yang K, Zhang G, Wang C: **Independent and**  
8 631 **combined effects of resting heart rate and pulse pressure with metabolic syndrome in Chinese**  
9 632 **rural population: The Henan Rural Cohort study.** *CLIN CHIM ACTA* 2018, **484**:246-252.
- 10 633 34. Li WJ, Fang W, Cai ZF, Han X, Zheng MY, Chen GZ, Wu WQ, Chen ZC, Chen YR, Wu SL:  
11 634 **[Association between pulse pressure and new-onset diabetes in hypertensive patients].** *Zhonghua*  
12 635 *Xin Xue Guan Bing Za Zhi* 2021, **49**(7):673-679.
- 13 636 35. Wu Y, Han X, Gao J, Wang Y, Zhu C, Huang Z, Xing A, Chen S, Ma Y, Zheng M *et al*:  
14 637 **Individual and combined contributions of age-specific and sex-specific pulse pressure and**  
15 638 **brachial-ankle pulse wave velocity to the risk of new-onset diabetes mellitus.** *BMJ OPEN DIAB*  
16 639 *RES CA* 2021, **9**(1).
- 17 640 36. Chen JY, Chou CH, Lee YL, Tsai WC, Lin CC, Huang YY, Chen JH: **Association of central**  
18 641 **aortic pressures indexes with development of diabetes mellitus in essential hypertension.** *AM J*  
19 642 *HYPERTENS* 2010, **23**(10):1069-1073.
- 20 643 37. Juneja A, Dwivedi S, Srivastava DK, Chandra K: **Insulin Resistance in Young Obese Subjects**  
21 644 **and Its Relation to Smoking (A Pilot Study).** *INDIAN J CLIN BIOCHE* 2017, **32**(1):99-102.
- 22 645 38. Ciarambino T, Crispino P, Guarisco G, Giordano M: **Gender Differences in Insulin Resistance:**  
23 646 **New Knowledge and Perspectives.** *CURR ISSUES MOL BIOL* 2023, **45**(10):7845-7861.
- 24 647 39. Muris DM, Houben AJ, Schram MT, Stehouwer CD: **Microvascular dysfunction is associated**  
25 648 **with a higher incidence of type 2 diabetes mellitus: a systematic review and meta-analysis.**  
26 649 *ARTERIOSCL THROM VAS* 2012, **32**(12):3082-3094.
- 27 650 40. Levy BI, Schiffrin EL, Mourad JJ, Agostini D, Vicaute E, Safar ME, Struijker-Boudier HA:  
28 651 **Impaired tissue perfusion: a pathology common to hypertension, obesity, and diabetes mellitus.**  
29 652 *CIRCULATION* 2008, **118**(9):968-976.
- 30 653 41. Vincent MA, Clerk LH, Lindner JR, Klibanov AL, Clark MG, Rattigan S, Barrett EJ:  
31 654 **Microvascular recruitment is an early insulin effect that regulates skeletal muscle glucose uptake**  
32 655 **in vivo.** *DIABETES* 2004, **53**(6):1418-1423.
- 33 656 42. Malik AR, Kondragunta V, Kullo IJ: **Forearm vascular reactivity and arterial stiffness in**  
34 657 **asymptomatic adults from the community.** *HYPERTENSION* 2008, **51**(6):1512-1518.
- 35 658 43. Malik AR, Kondragunta V, Kullo IJ: **Forearm vascular reactivity and arterial stiffness in**  
36 659 **asymptomatic adults from the community.** *HYPERTENSION* 2008, **51**(6):1512-1518.
- 37 660 44. O'Rourke MF, Hashimoto J: **Mechanical factors in arterial aging: a clinical perspective.** *J AM*  
38 661 *COLL CARDIOL* 2007, **50**(1):1-13.
- 39 662 45. Ungvari Z, Csiszar A, Kaminski PM, Wolin MS, Koller A: **Chronic high pressure-induced**  
40 663 **arterial oxidative stress: involvement of protein kinase C-dependent NAD(P)H oxidase and local**  
41 664 **renin-angiotensin system.** *AM J PATHOL* 2004, **165**(1):219-226.
- 42 665  
43 666

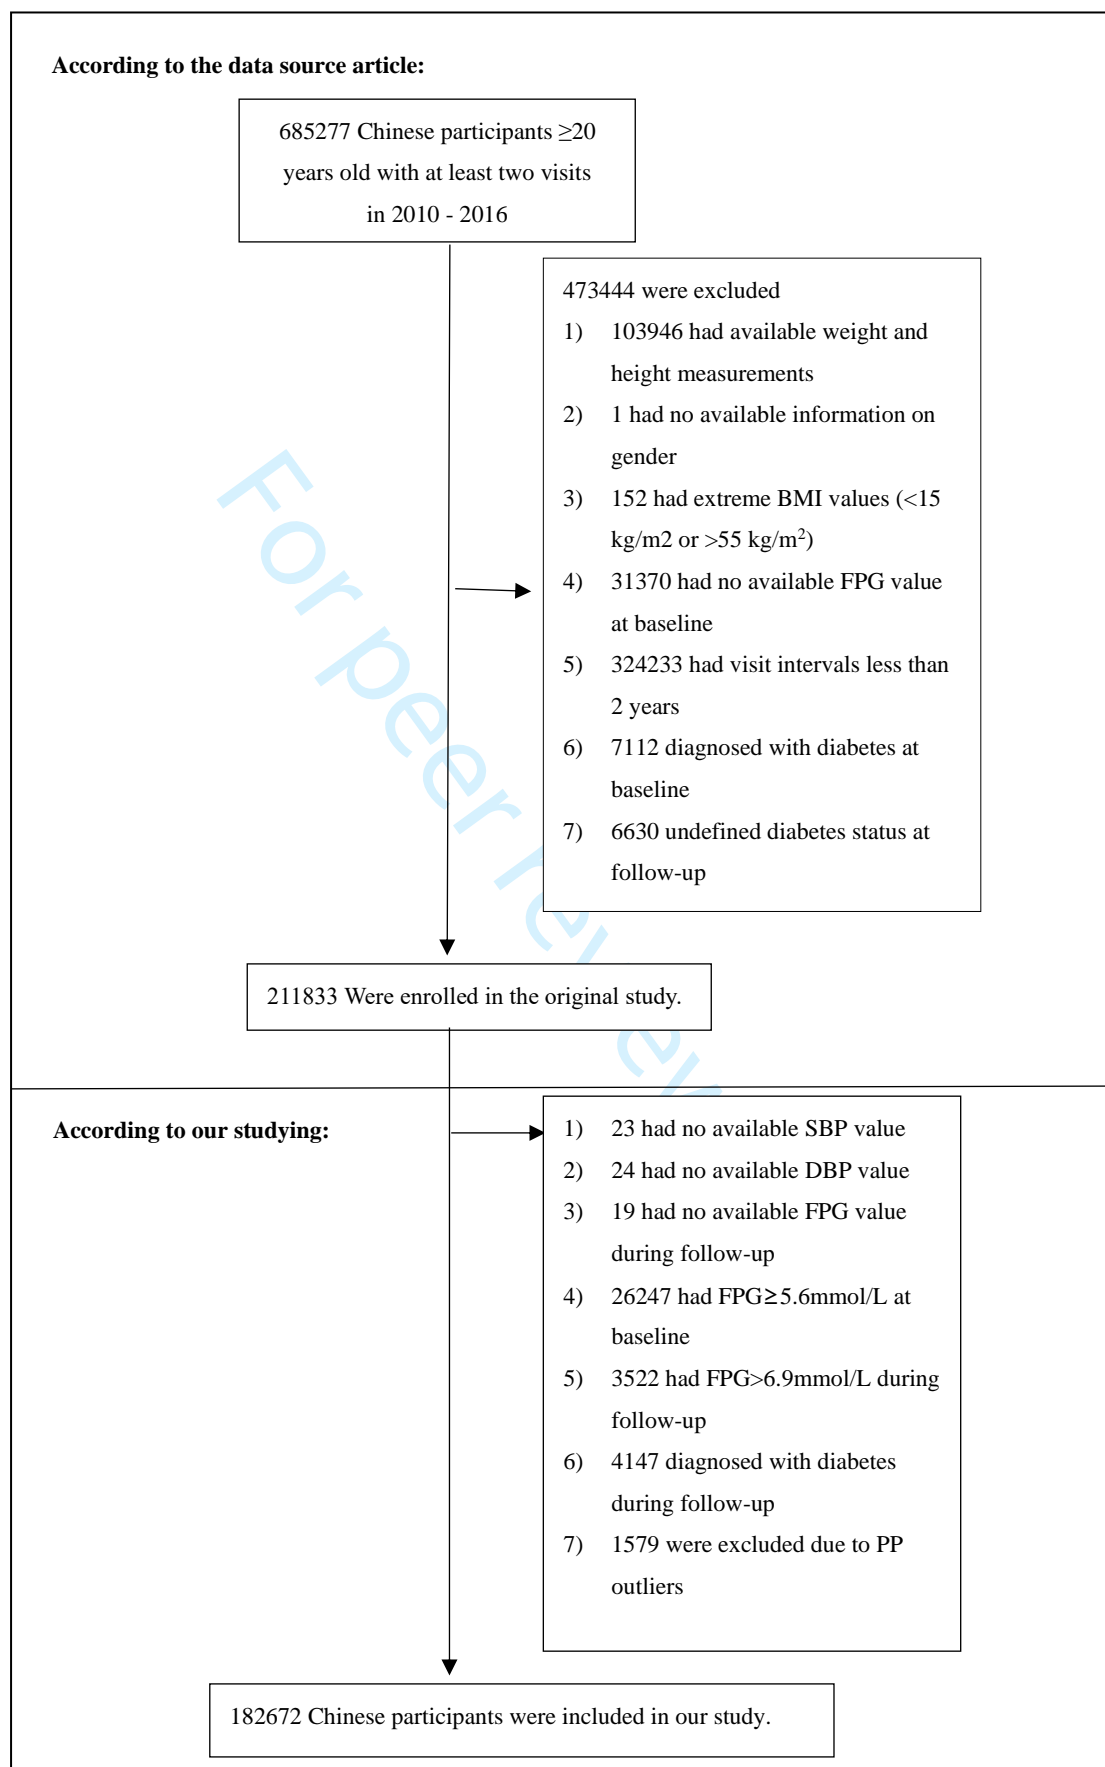

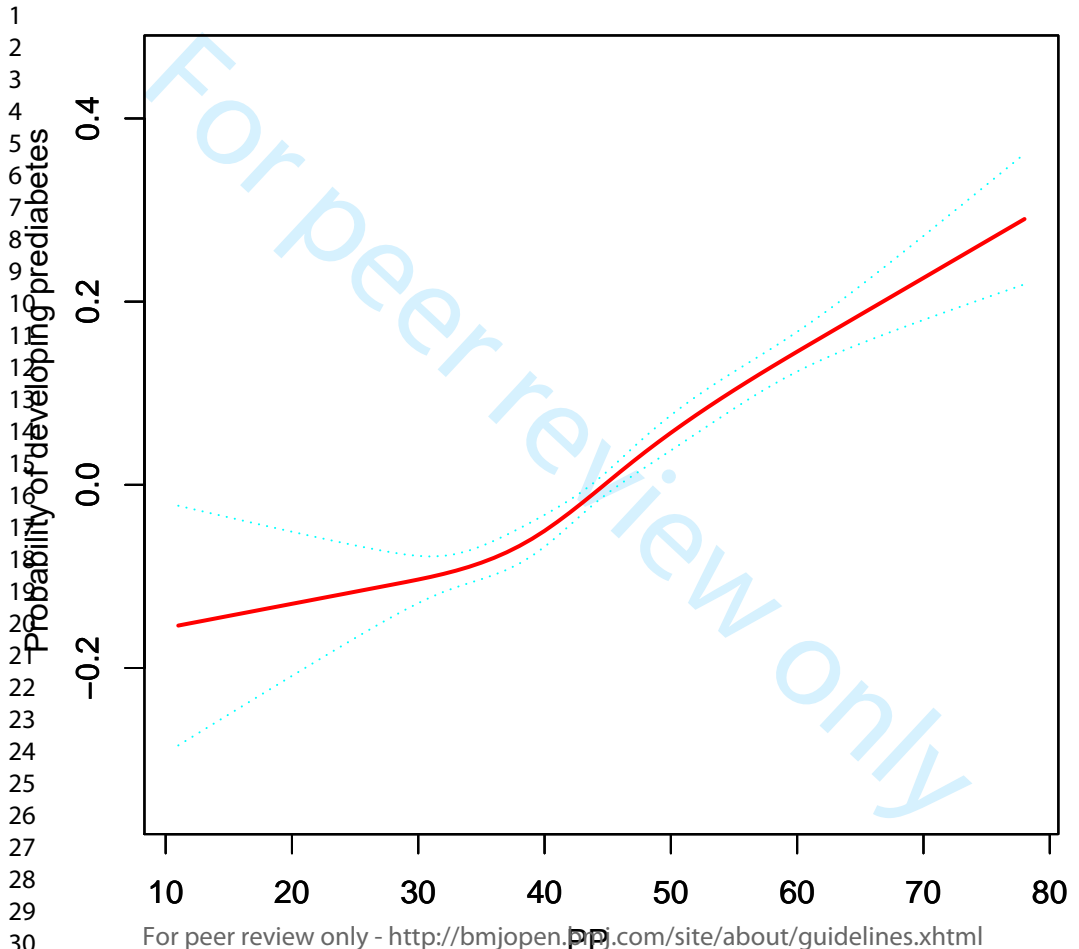

1  
2  
3  
4  
5  
6  
7  
8  
9  
10  
11  
12  
13  
14  
15  
16  
17  
18  
19  
20  
21  
22  
23  
24  
25  
26  
27  
28  
29  
30  
31  
32



### Number at risk

|    | 2     | 3     | 4     | 5    | 6 |
|----|-------|-------|-------|------|---|
| PP | 39914 | 21231 | 9935  | 2027 | 1 |
| Q1 | 47771 | 24322 | 10844 | 2155 | 1 |
| Q2 | 43811 | 21525 | 9281  | 1760 | 0 |
| Q3 | 51176 | 24666 | 10207 | 2058 | 0 |

Year of follow-up

**Supplemental Table 1** Incidence rate of incident prediabetes.

| PP             | Participants<br>(n) | prediabetes events<br>(n) | Cumulative incidence (95%CI) (%) | Per 100,000<br>person-year |
|----------------|---------------------|---------------------------|----------------------------------|----------------------------|
| Total          | 182672              | 20284                     | 11.10 (10.96–11.25)              | 3532.68                    |
| Q1             | 39914               | 3560                      | 8.92(8.64–9.20)                  | 2779.24                    |
| Q2             | 47771               | 4525                      | 9.47 (9.21–9.73)                 | 2999.95                    |
| Q3             | 43811               | 4740                      | 10.82 (10.53–11.11)              | 3470.06                    |
| Q4             | 51176               | 7459                      | 14.58 (14.27–14.88)              | 4701.37                    |
| P for<br>trend |                     |                           | <0.001                           | <0.001                     |

PP: pulse pressure, CI: confidence interval



**Supplemental Table 2** The results of the univariate analysis

|                            | Statistics       | HR (95%CI)           | P value  |
|----------------------------|------------------|----------------------|----------|
| Gender                     |                  |                      | <0.0001  |
| Male                       | 96966 (53.082%)  | ref                  |          |
| Female                     | 85706 (46.918%)  | 0.627 (0.609, 0.645) | <0.00001 |
| Age(years)                 | 40.832 ± 11.864  | 1.033 (1.032, 1.034) | <0.00001 |
| Drinking status            |                  |                      |          |
| Current-drinker            | 2924 (1.601%)    | ref                  |          |
| Ex-drinker                 | 22634 (12.391%)  | 0.770 (0.701, 0.846) | <0.00001 |
| Never- drinker             | 157114 (86.009%) | 0.607 (0.556, 0.663) | <0.00001 |
| Smoking status             |                  |                      |          |
| Current-smoker             | 29424 (16.108%)  | ref                  |          |
| Ex-smoker                  | 6566 (3.594%)    | 0.896 (0.834, 0.963) | 0.00286  |
| Never-smoker               | 146682 (80.298%) | 0.714 (0.691, 0.739) | <0.00001 |
| Family history of diabetes |                  |                      | 0.3503   |
| No                         | 179039 (98.011%) | ref                  |          |
| Yes                        | 3633 (1.989%)    | 1.054 (0.965, 1.153) | 0.24372  |
| SBP (mmHg)                 | 117.428 ± 15.208 | 1.026 (1.025, 1.027) | <0.00001 |
| DBP (mmHg)                 | 73.492 ± 10.572  | 1.029 (1.028, 1.030) | <0.00001 |
| PP (mmHg)                  | 43.936 ± 10.595  | 1.025 (1.023, 1.026) | <0.00001 |
| BMI (kg/m <sup>2</sup> )   | 22.976 ± 3.259   | 1.124 (1.120, 1.129) | <0.00001 |
| AST(U/L)                   | 23.591 ± 12.164  | 1.005 (1.005, 1.006) | <0.00001 |
| ALT (U/L)                  | 23.232 ± 21.734  | 1.003 (1.003, 1.004) | <0.00001 |
| HDL-C (mmol/L)             | 1.372 ± 0.307    | 0.739 (0.707, 0.773) | <0.00001 |
| TG (mmol/L)                | 1.267 ± 0.934    | 1.200 (1.192, 1.208) | <0.00001 |
| LDL-C (mmol/L)             | 2.685 ± 0.671    | 1.280 (1.256, 1.305) | <0.00001 |
| TC (mmol/L)                | 4.661 ± 0.882    | 1.220 (1.202, 1.238) | <0.00001 |
| BUN (mmol/L)               | 4.602 ± 1.167    | 1.136 (1.124, 1.149) | <0.00001 |
| SCr (umol/L)               | 69.565 ± 15.522  | 1.006 (1.006, 1.007) | <0.00001 |
| FPG (mmol/L)               | 4.765 ± 0.487    | 5.711 (5.513, 5.916) | <0.00001 |

PP: pulse pressure, SBP systolic blood pressure, DBP diastolic blood pressure, BMI body mass index, ALT alanine aminotransferase, AST aspartate aminotransferase, HDL-C high-density lipoprotein cholesterol, LDL-C low-density lipoprotein cholesterol, TC total cholesterol, TG triglycerides, Scr serum creatinine, BUN blood urea nitrogen, FPG fasting plasma glucose

**Supplemental Table 3** Relationship between PP and prediabetes in different sensitivity analyses

| Exposure      | Model I (HR,95%CI, P)         | Model II (HR,95%CI, P)        |
|---------------|-------------------------------|-------------------------------|
| PP            | 1.011 (1.009, 1.013) <0.00001 | 1.008 (1.007, 1.010) <0.00001 |
| PP (Quintile) |                               |                               |
| Q1            | Ref                           | Ref                           |
| Q2            | 1.055 (0.999, 1.115) 0.05494  | 1.040 (0.993, 1.090) 0.09739  |
| Q3            | 1.166 (1.104, 1.232) <0.00001 | 1.123 (1.072, 1.177) <0.00001 |
| Q4            | 1.310 (1.244, 1.379) <0.00001 | 1.228 (1.175, 1.285) <0.00001 |
| P for trend   | <0.00001                      | <0.00001                      |

Model I was sensitivity analysis in participants without BMI $\geq$ 25kg/m<sup>2</sup>. We adjusted gender, age, family history of diabetes, drinking status, smoking status, TC, TG, HDL-C, LDL-C, AST, ALT, SCr, BUN, and FPG.

Model II was sensitivity analysis in participants without age $\geq$ 60 years. We adjusted gender, family history of diabetes, drinking status, smoking status, BMI, TC, TG, HDL-C, LDL-C, AST, ALT, SCr, BUN, and FPG.

HR, hazard ratios; CI, confidence; Ref: reference; PP: pulse pressure

**Supplemental Table 4** Variables included age, gender, smoking status, BMI, family history of diabetes, and drinking status interacted with PP

| Characteristic             | P-value |
|----------------------------|---------|
| Age                        | <0.001  |
| Gender                     | <0.001  |
| BMI                        | <0.001  |
| Family history of diabetes | <0.001  |
| Smoking status             | <0.001  |
| Drinking status            | <0.001  |

For peer review only

**Supplemental Table 5** Effect size of PP on prediabetes in prespecified and exploratory subgroups

| Characteristic             | No of participants | HR (95%CI)           | P value | P for interaction |
|----------------------------|--------------------|----------------------|---------|-------------------|
| Age, years                 |                    |                      |         | 0.1335            |
| <60                        | 165813             | 1.008 (1.006, 1.009) | <0.0001 |                   |
| ≥60                        | 16859              | 1.010 (1.007, 1.013) | <0.0001 |                   |
| Gender                     |                    |                      |         | 0.0002            |
| Male                       | 96966              | 1.006 (1.004, 1.008) | <0.0001 |                   |
| Female                     | 85706              | 1.011 (1.009, 1.013) | <0.0001 |                   |
| BMI (kg/m <sup>2</sup> )   |                    |                      |         | <0.0001           |
| <25                        | 135554             | 1.012 (1.010, 1.014) | <0.0001 |                   |
| ≥25                        | 47118              | 1.006 (1.004, 1.008) | <0.0001 |                   |
| Smoking status             |                    |                      |         | 0.0075            |
| Current smoker             | 29424              | 1.005 (1.002, 1.008) | 0.0002  |                   |
| Ever smoker                | 6566               | 1.007 (1.001, 1.013) | 0.0211  |                   |
| Never smoker               | 146682             | 1.010 (1.008, 1.011) | <0.0001 |                   |
| Drinking status            |                    |                      |         | 0.2713            |
| Current drinker            | 2924               | 1.014 (1.006, 1.022) | <0.0001 |                   |
| Ever drinker               | 22634              | 1.007 (1.004, 1.010) | <0.0001 |                   |
| Never drinker              | 157114             | 1.009 (1.007, 1.010) | <0.0001 |                   |
| Family history of diabetes |                    |                      |         | 0.0618            |
| No                         | 179039             | 1.009 (1.007, 1.010) | <0.0001 |                   |
| Yes                        | 3633               | 1.001 (0.992, 1.009) | 0.9074  |                   |

Note 1: The above model was adjusted for gender, age, family history of diabetes, drinking status, smoking status, BMI, TC, TG, HDL-C, LDL-C, AST, ALT, SCr, BUN, and FPG.

Note 2: The model is not adjusted for the stratification variable in each case.

**Supplemental Table 6** Relationship between PP and the incident prediabetes in pre-imputation data and imputed datasets

| Exposure                   | Pre-imputation   | Imputation       | P-value |
|----------------------------|------------------|------------------|---------|
| Participants               | 182672           | 182672           |         |
| Gender                     |                  |                  | 1.000   |
| Male                       | 96966 (53.082%)  | 96966 (53.082%)  |         |
| Female                     | 85706 (46.918%)  | 85706 (46.918%)  |         |
| Age(years)                 | 40.832 ± 11.864  | 40.832 ± 11.864  | 1.000   |
| Drinking status            |                  |                  | <0.001  |
| Current-drinker            | 978 (1.932%)     | 2924 (1.601%)    |         |
| Ex-drinker                 | 7340 (14.501%)   | 22634 (12.391%)  |         |
| Never- drinker             | 42299 (83.567%)  | 157114 (86.009%) |         |
| Smoking status             |                  |                  | <0.001  |
| Current-smoker             | 9609 (18.984%)   | 29424 (16.108%)  |         |
| Ex-smoker                  | 2104 (4.157%)    | 6566 (3.594%)    |         |
| Never-smoker               | 38904 (76.860%)  | 146682 (80.298%) |         |
| Family history of diabetes |                  |                  | 1.000   |
| No                         | 179039 (98.011%) | 179039 (98.011%) |         |
| Yes                        | 3633 (1.989%)    | 3633 (1.989%)    |         |
| BMI (kg/m <sup>2</sup> )   | 22.976 ± 3.259   | 22.976 ± 3.259   | 1.000   |
| AST(U/L)                   | 23.685 ± 12.404  | 23.591 ± 12.164  | 0.075   |
| ALT (U/L)                  | 23.219 ± 21.739  | 23.232 ± 21.734  | 0.854   |
| HDL-C (mmol/L)             | 1.378 ± 0.308    | 1.372 ± 0.307    | <0.001  |
| TG (mmol/L)                | 1.268 ± 0.934    | 1.267 ± 0.934    | 0.889   |
| LDL-C (mmol/L)             | 2.739 ± 0.669    | 2.685 ± 0.671    | <0.001  |
| TC (mmol/L)                | 4.663 ± 0.883    | 4.661 ± 0.882    | 0.630   |
| BUN (mmol/L)               | 4.604 ± 1.165    | 4.602 ± 1.167    | 0.630   |
| SCr (umol/L)               | 69.628 ± 15.507  | 69.565 ± 15.522  | 0.228   |
| FBG (mmol/L)               | 4.765 ± 0.487    | 4.765 ± 0.487    | 1.000   |

STROBE Statement—Checklist of items that should be included in reports of *cohort studies*

|                              | Item No | Recommendation                                                                                                                                                                                                                                                                                  | Page No  |
|------------------------------|---------|-------------------------------------------------------------------------------------------------------------------------------------------------------------------------------------------------------------------------------------------------------------------------------------------------|----------|
| <b>Title and abstract</b>    | 1       | (a) Indicate the study's design with a commonly used term in the title or the abstract<br>(b) Provide in the abstract an informative and balanced summary of what was done and what was found                                                                                                   | 1<br>3-4 |
| <b>Introduction</b>          |         |                                                                                                                                                                                                                                                                                                 |          |
| Background/rationale         | 2       | Explain the scientific background and rationale for the investigation being reported                                                                                                                                                                                                            | 6        |
| Objectives                   | 3       | State specific objectives, including any prespecified hypotheses                                                                                                                                                                                                                                | 6        |
| <b>Methods</b>               |         |                                                                                                                                                                                                                                                                                                 |          |
| Study design                 | 4       | Present key elements of study design early in the paper                                                                                                                                                                                                                                         | 7        |
| Setting                      | 5       | Describe the setting, locations, and relevant dates, including periods of recruitment, exposure, follow-up, and data collection                                                                                                                                                                 | 7        |
| Participants                 | 6       | (a) Give the eligibility criteria, and the sources and methods of selection of participants. Describe methods of follow-up                                                                                                                                                                      | 7        |
|                              |         | (b) For matched studies, give matching criteria and number of exposed and unexposed                                                                                                                                                                                                             | 7        |
| Variables                    | 7       | Clearly define all outcomes, exposures, predictors, potential confounders, and effect modifiers. Give diagnostic criteria, if applicable                                                                                                                                                        | 7-8      |
| Data sources/<br>measurement | 8*      | For each variable of interest, give sources of data and details of methods of assessment (measurement). Describe comparability of assessment methods if there is more than one group                                                                                                            | 7        |
| Bias                         | 9       | Describe any efforts to address potential sources of bias                                                                                                                                                                                                                                       |          |
| Study size                   | 10      | Explain how the study size was arrived at                                                                                                                                                                                                                                                       |          |
| Quantitative variables       | 11      | Explain how quantitative variables were handled in the analyses. If applicable, describe which groupings were chosen and why                                                                                                                                                                    | 7-8      |
| Statistical methods          | 12      | (a) Describe all statistical methods, including those used to control for confounding                                                                                                                                                                                                           | 8        |
|                              |         | (b) Describe any methods used to examine subgroups and interactions                                                                                                                                                                                                                             | 10       |
|                              |         | (c) Explain how missing data were addressed                                                                                                                                                                                                                                                     | 9        |
|                              |         | (d) If applicable, explain how loss to follow-up was addressed                                                                                                                                                                                                                                  |          |
|                              |         | (e) Describe any sensitivity analyses                                                                                                                                                                                                                                                           | 9        |
| <b>Results</b>               |         |                                                                                                                                                                                                                                                                                                 |          |
| Participants                 | 13*     | (a) Report numbers of individuals at each stage of study—eg numbers potentially eligible, examined for eligibility, confirmed eligible, included in the study, completing follow-up, and analysed<br>(b) Give reasons for non-participation at each stage<br>(c) Consider use of a flow diagram | 10-11    |
| Descriptive data             | 14*     | (a) Give characteristics of study participants (eg demographic, clinical, social) and information on exposures and potential confounders                                                                                                                                                        | 10-11    |
|                              |         | (b) Indicate number of participants with missing data for each variable of interest                                                                                                                                                                                                             |          |
|                              |         | (c) Summarise follow-up time (eg, average and total amount)                                                                                                                                                                                                                                     | 10-11    |
| Outcome data                 | 15*     | Report numbers of outcome events or summary measures over time                                                                                                                                                                                                                                  | 11       |

|    |                          |    |                                                                                                                                                                                                              |       |
|----|--------------------------|----|--------------------------------------------------------------------------------------------------------------------------------------------------------------------------------------------------------------|-------|
| 1  | Main results             | 16 | (a) Give unadjusted estimates and, if applicable, confounder-adjusted estimates and their precision (eg, 95% confidence interval). Make clear which confounders were adjusted for and why they were included | 11-12 |
| 2  |                          |    | (b) Report category boundaries when continuous variables were categorized                                                                                                                                    | 12    |
| 3  |                          |    | (c) If relevant, consider translating estimates of relative risk into absolute risk for a meaningful time period                                                                                             | 12    |
| 4  |                          |    |                                                                                                                                                                                                              |       |
| 5  | Other analyses           | 17 | Report other analyses done—eg analyses of subgroups and interactions, and sensitivity analyses                                                                                                               | 12-13 |
| 6  |                          |    |                                                                                                                                                                                                              |       |
| 7  |                          |    |                                                                                                                                                                                                              |       |
| 8  |                          |    |                                                                                                                                                                                                              |       |
| 9  |                          |    |                                                                                                                                                                                                              |       |
| 10 |                          |    |                                                                                                                                                                                                              |       |
| 11 | <b>Discussion</b>        |    |                                                                                                                                                                                                              |       |
| 12 | Key results              | 18 | Summarise key results with reference to study objectives                                                                                                                                                     | 13-14 |
| 13 | Limitations              | 19 | Discuss limitations of the study, taking into account sources of potential bias or imprecision. Discuss both direction and magnitude of any potential bias                                                   | 16-17 |
| 14 | Interpretation           | 20 | Give a cautious overall interpretation of results considering objectives, limitations, multiplicity of analyses, results from similar studies, and other relevant evidence                                   | 14-16 |
| 15 | Generalisability         | 21 | Discuss the generalisability (external validity) of the study results                                                                                                                                        | 16    |
| 16 |                          |    |                                                                                                                                                                                                              |       |
| 17 | <b>Other information</b> |    |                                                                                                                                                                                                              |       |
| 18 | Funding                  | 22 | Give the source of funding and the role of the funders for the present study and, if applicable, for the original study on which the present article is based                                                | 18    |
| 19 |                          |    |                                                                                                                                                                                                              |       |
| 20 |                          |    |                                                                                                                                                                                                              |       |
| 21 |                          |    |                                                                                                                                                                                                              |       |
| 22 |                          |    |                                                                                                                                                                                                              |       |
| 23 |                          |    |                                                                                                                                                                                                              |       |
| 24 |                          |    |                                                                                                                                                                                                              |       |
| 25 |                          |    |                                                                                                                                                                                                              |       |
| 26 |                          |    |                                                                                                                                                                                                              |       |
| 27 |                          |    |                                                                                                                                                                                                              |       |
| 28 |                          |    |                                                                                                                                                                                                              |       |
| 29 |                          |    |                                                                                                                                                                                                              |       |
| 30 |                          |    |                                                                                                                                                                                                              |       |
| 31 |                          |    |                                                                                                                                                                                                              |       |
| 32 |                          |    |                                                                                                                                                                                                              |       |
| 33 |                          |    |                                                                                                                                                                                                              |       |
| 34 |                          |    |                                                                                                                                                                                                              |       |
| 35 |                          |    |                                                                                                                                                                                                              |       |
| 36 |                          |    |                                                                                                                                                                                                              |       |
| 37 |                          |    |                                                                                                                                                                                                              |       |
| 38 |                          |    |                                                                                                                                                                                                              |       |
| 39 |                          |    |                                                                                                                                                                                                              |       |
| 40 |                          |    |                                                                                                                                                                                                              |       |
| 41 |                          |    |                                                                                                                                                                                                              |       |
| 42 |                          |    |                                                                                                                                                                                                              |       |
| 43 |                          |    |                                                                                                                                                                                                              |       |
| 44 |                          |    |                                                                                                                                                                                                              |       |
| 45 |                          |    |                                                                                                                                                                                                              |       |
| 46 |                          |    |                                                                                                                                                                                                              |       |
| 47 |                          |    |                                                                                                                                                                                                              |       |
| 48 |                          |    |                                                                                                                                                                                                              |       |
| 49 |                          |    |                                                                                                                                                                                                              |       |
| 50 |                          |    |                                                                                                                                                                                                              |       |
| 51 |                          |    |                                                                                                                                                                                                              |       |
| 52 |                          |    |                                                                                                                                                                                                              |       |
| 53 |                          |    |                                                                                                                                                                                                              |       |
| 54 |                          |    |                                                                                                                                                                                                              |       |
| 55 |                          |    |                                                                                                                                                                                                              |       |
| 56 |                          |    |                                                                                                                                                                                                              |       |
| 57 |                          |    |                                                                                                                                                                                                              |       |
| 58 |                          |    |                                                                                                                                                                                                              |       |
| 59 |                          |    |                                                                                                                                                                                                              |       |
| 60 |                          |    |                                                                                                                                                                                                              |       |

\*Give information separately for exposed and unexposed groups.

**Note:** An Explanation and Elaboration article discusses each checklist item and gives methodological background and published examples of transparent reporting. The STROBE checklist is best used in conjunction with this article (freely available on the Web sites of PLoS Medicine at <http://www.plosmedicine.org/>, Annals of Internal Medicine at <http://www.annals.org/>, and Epidemiology at <http://www.epidem.com/>). Information on the STROBE Initiative is available at <http://www.strobe-statement.org>.

# BMJ Open

## Nonlinear relationship between pulse pressure and the risk of prediabetes: a secondary retrospective Chinese cohort study

|                                 |                                                                                                                                                                                                                                                                                                                                                                                                                                                                                                   |
|---------------------------------|---------------------------------------------------------------------------------------------------------------------------------------------------------------------------------------------------------------------------------------------------------------------------------------------------------------------------------------------------------------------------------------------------------------------------------------------------------------------------------------------------|
| Journal:                        | <i>BMJ Open</i>                                                                                                                                                                                                                                                                                                                                                                                                                                                                                   |
| Manuscript ID                   | bmjopen-2023-080018.R2                                                                                                                                                                                                                                                                                                                                                                                                                                                                            |
| Article Type:                   | Original research                                                                                                                                                                                                                                                                                                                                                                                                                                                                                 |
| Date Submitted by the Author:   | 29-Feb-2024                                                                                                                                                                                                                                                                                                                                                                                                                                                                                       |
| Complete List of Authors:       | Cao, Changchun; Shenzhen Dapeng New District Nan'ao People's Hospital,<br>Han, Yong; Shenzhen Second People's Hospital, Department of Emergency<br>Hu, Haofei; Shenzhen University First Affiliated Hospital, Department of Nephrology<br>He, Yongcheng ; Affiliated Hospital of North Sichuan Medical College, Department of Nephrology; Shenzhen Hengsheng Hospital, Department of Nephrology<br>Luo, Jiao; Shenzhen Dapeng New District Nan'ao People's Hospital, Department of Rehabilitation |
| <b>Primary Subject Heading</b>: | Diabetes and endocrinology                                                                                                                                                                                                                                                                                                                                                                                                                                                                        |
| Secondary Subject Heading:      | Cardiovascular medicine                                                                                                                                                                                                                                                                                                                                                                                                                                                                           |
| Keywords:                       | Blood Pressure, China, General diabetes < DIABETES & ENDOCRINOLOGY                                                                                                                                                                                                                                                                                                                                                                                                                                |
|                                 |                                                                                                                                                                                                                                                                                                                                                                                                                                                                                                   |

SCHOLARONE™  
Manuscripts





I, the Submitting Author has the right to grant and does grant on behalf of all authors of the Work (as defined in the below author licence), an exclusive licence and/or a non-exclusive licence for contributions from authors who are: i) UK Crown employees; ii) where BMJ has agreed a CC-BY licence shall apply, and/or iii) in accordance with the terms applicable for US Federal Government officers or employees acting as part of their official duties; on a worldwide, perpetual, irrevocable, royalty-free basis to BMJ Publishing Group Ltd ("BMJ") its licensees and where the relevant Journal is co-owned by BMJ to the co-owners of the Journal, to publish the Work in this journal and any other BMJ products and to exploit all rights, as set out in our [licence](#).

The Submitting Author accepts and understands that any supply made under these terms is made by BMJ to the Submitting Author unless you are acting as an employee on behalf of your employer or a postgraduate student of an affiliated institution which is paying any applicable article publishing charge ("APC") for Open Access articles. Where the Submitting Author wishes to make the Work available on an Open Access basis (and intends to pay the relevant APC), the terms of reuse of such Open Access shall be governed by a Creative Commons licence – details of these licences and which [Creative Commons](#) licence will apply to this Work are set out in our licence referred to above.

Other than as permitted in any relevant BMJ Author's Self Archiving Policies, I confirm this Work has not been accepted for publication elsewhere, is not being considered for publication elsewhere and does not duplicate material already published. I confirm all authors consent to publication of this Work and authorise the granting of this licence.

1 **Nonlinear relationship between pulse pressure and the risk of**  
2 **prediabetes: a secondary retrospective Chinese cohort study**

3 **Running title: PP and Pre-DM risk**

4 **Changchun Cao<sup>1#</sup>, Yong Han<sup>2#</sup>, Haofei Hu<sup>3\*</sup>, Yongcheng He<sup>4,5\*</sup>, Jiao Luo<sup>1\*</sup>**

5 <sup>1</sup>Department of Rehabilitation, Shenzhen Dapeng New District Nan'ao People's Hospital, Shenzhen 518000,  
6 Guangdong Province, China

7 <sup>2</sup>Department of Emergency, Shenzhen Second People's Hospital, The First Affiliated Hospital of Shenzhen  
8 University, Shenzhen 518000, Guangdong Province, China

9 <sup>3</sup>Department of Nephrology, Shenzhen Second People's Hospital, The First Affiliated Hospital of Shenzhen  
10 University, Shenzhen 518000, Guangdong Province, China

11 <sup>4</sup>Department of Nephrology, Affiliated Hospital of North Sichuan Medical College, Nanchong, 637000, Sichuan  
12 Province, China

13 <sup>5</sup>Department of Nephrology, Shenzhen Hengsheng Hospital, Shenzhen 518000, Guangdong Province, China

14  
15 Changchun Cao and Yong Han have contributed equally to this work.

16 \*Corresponding author

17 Haofei Hu

18 Department of Nephrology, The First Affiliated Hospital of Shenzhen University, Shenzhen 518000, Guangdong  
19 Province, China

20 E-mail: huhaofei0319@126.com

21 Yongcheng He

22 Department of Nephrology, Affiliated hospital of North Sichuan Medical College, No.1 Maoyuan South Road,

1  
2  
3  
4  
5  
6  
7  
8  
9  
10  
11  
12  
13  
14  
15  
16  
17  
18  
19  
20  
21  
22  
23  
24  
25  
26  
27  
28  
29  
30  
31  
32  
33  
34  
35  
36  
37  
38  
39  
40  
41  
42  
43  
44  
45  
46  
47  
48  
49  
50  
51  
52  
53  
54  
55  
56  
57  
58  
59  
60

- 23 Nanchong, Sichuan, China.
- 24 Department of Nephrology, Shenzhen Hengsheng Hospital, No.20 Yintian Road, Xixiang Street, Baoan District,
- 25 Shenzhen 518000, Guangdong Province, China.
- 26 E-mail: heyongcheng640815@126.com
- 27 Jiao Luo
- 28 Department of Rehabilitation, Shenzhen Dapeng New District Nan'ao People's Hospital, No. 6, Renmin Road,
- 29 Dapeng New District, Shenzhen 518000, Guangdong Province, China.
- 30 E-mail: luojiao1989@email.szu.edu.cn
- 31
- 32
- 33
- 34
- 35
- 36
- 37
- 38
- 39
- 40
- 41
- 42
- 43
- 44
- 45
- 46
- 47
- 48
- 49
- 50
- 51
- 52
- 53
- 54
- 55
- 56
- 57
- 58
- 59
- 60

## 45 Abstract

46 **Objective:** Previous research has shown that pulse pressure has a significant role in the start and  
47 development of type 2 diabetes mellitus. However, there is little proof that pulse pressure and  
48 prediabetes are related. Our study aimed to investigate the relationship between pulse pressure and  
49 incident prediabetes in a substantial cohort of Chinese participants.

50 **Design:** The 'DATADRYAD' database ([www.Datadryad.org](http://www.Datadryad.org)) was used to retrieve the data for this  
51 secondary retrospective cohort analysis.

52 **Participants:** Data from 182672 Chinese individuals who participated in the medical examination  
53 program were recorded in this retrospective cohort study between 2010 and 2016 across 32 sites  
54 and 11 cities in China.

55 **Setting:** Pulse pressure assessed at baseline and incident prediabetes during follow-up were the  
56 target-independent and dependent variables. The association between pulse pressure and  
57 prediabetes was investigated using Cox proportional hazards regression.

58 **Primary outcome measures:** The outcome was incident prediabetes. Impaired fasting glucose  
59 levels (fasting blood glucose between 5.6 and 6.9 mmol/L) were used to define prediabetes.

60 **Results:** After controlling for confounding variables, pulse pressure was positively correlated with  
61 incident prediabetes among Chinese adults (HR: 1.009, 95%CI: 1.007-1.010). Additionally, at a  
62 pulse pressure inflection point of 29 mmHg, a nonlinear connection between the pulse pressure  
63 and incident prediabetes was discovered. Increased pulse pressure was an independent risk factor  
64 for developing prediabetes when pulse pressure was greater than 29 mmHg. However, their  
65 association was not significant when pulse pressure was less than 29 mmHg. According to  
66 subgroup analyses, females, never smokers, and non-obesity correlated more significantly with

1  
2  
3  
4 67 pulse pressure and prediabetes.  
5

6 68 **Conclusion:** We discovered that higher pulse pressure independently correlated with prediabetes  
7  
8  
9 69 risk in this study of Chinese participants. The connection between pulse pressure and incident  
10  
11  
12 70 prediabetes was also nonlinear. High pulse pressure levels were related to a higher risk of  
13  
14  
15 71 prediabetes when pulse pressure was above 29 mmHg.  
16

17 72

18  
19  
20 73

21  
22 74

23  
24  
25 75

26  
27 76

28  
29  
30 77

31  
32 78

33  
34  
35 79

36  
37 80

38  
39  
40 81

41  
42 82

43  
44  
45 83

46  
47 84

48  
49  
50 85

51  
52 86

53  
54  
55 87

56  
57 88

58  
59  
60

For peer review only

1  
2  
3  
4 89 **Article Summary**  
5

6 90 **Article focus**  
7

8  
9 91 Our study investigated the relationship between PP and incident Pre-DM in a secondary  
10  
11  
12 92 retrospective cohort of Chinese participants.  
13

14 93 **Strengths and limitations of this study**  
15

16  
17 94 ● Our research leveraged a substantial sample size, drawing participants from multiple  
18  
19 95 centers, thus ensuring a robust representation of the Chinese population.  
20  
21

22 96 ● We elucidated a nonlinear relationship, marking the pioneering effort to pinpoint the  
23  
24 97 inflection point of PP's impact on Pre-DM.  
25  
26

27 98 ● Our subgroup analysis allowed us to delve into other potential risk factors within the PP  
28  
29 99 and incident Pre-DM association.  
30  
31

32 100 ● Our study did not incorporate a 2-hour oral glucose tolerance test or glycosylated  
33  
34 101 hemoglobin level measurements, which could potentially lead to an underestimation of the  
35  
36 102 incidence of Pre-DM.  
37  
38  
39

40 103  
41

42 104  
43

44 105  
45

46 106  
47

48 107  
49

50 108  
51

52 109  
53

54 110  
55  
56  
57  
58  
59  
60

## 111 **Introduction**

112 Prediabetes (Pre-DM) is intermediate hyperglycemia below the diagnostic cutoff for type 2  
113 diabetes mellitus (T2DM). Patients with Pre-DM have been reported to have a higher risk for  
114 cardiovascular disease and nephropathy, indicating that impaired glucose begins to have a  
115 pathogenic effect at this early stage of diabetes[1]. The prevalence of Pre-DM is increasing  
116 globally with an aging population, urbanization, and changing lifestyles. From 2008 to 2017, the  
117 prevalence of Pre-DM in China has climbed from 15.5%[2] to 35.2%[3], creating a significant  
118 public health burden. Approximately 70% of subjects with Pre-DM will eventually get T2DM[4].  
119 Numerous studies looked for ways to pinpoint the causes of diabetes and Pre-DM to prevent and  
120 cure the disease in its earliest stages.

121 Pulse pressure (PP) is referred to as the difference between systolic blood pressure (SBP) and  
122 diastolic blood pressure (DBP). Clinically, PP is the manifestation of atherosclerosis[5].  
123 Compared to their non-diabetic contemporaries, people with T2DM have greater atherosclerosis,  
124 which results in a broad PP[5]. A greater risk of cardiovascular disease (CVD) exists in T2DM  
125 patients[6]. In addition, an increase in PP is another risk factor for CVD incidence and positively  
126 correlates with mortality[7-9]. Additionally, compared to healthy individuals, prediabetic patients  
127 have a greater burden from coronary atherosclerosis[10]. Notably, the atherosclerosis burden  
128 began to develop even before T2DM's clinical symptoms[10]. PP was found to be a significant  
129 risk factor for T2DM in a recent retrospective cohort investigation of a sizable sample[11].  
130 However, whether prediabetes in Chinese adults is associated with PP is unknown. This study  
131 sought to analyze the precise correlation between PP and the likelihood of developing Pre-DM in  
132 Chinese participants.

## 133 **Methods**

### 134 **Data source**

135 Researchers can obtain original research data for free via the Dryad Digital Repository. The  
136 Dryad data repository's data on 211833 Chinese persons was downloaded[12]. The current  
137 research employed openly available data from a medical examination program as a secondary  
138 inquiry. Researchers may use the data for secondary analysis in accordance with the Dryad terms  
139 of service without interfering with the interests of the authors.

### 140 **Study population**

141 The original study was approved by the Rich Healthcare Group Review Board. Hence, ethical  
142 approval was not required for this secondary analysis. Each participant conducted under the Rich  
143 Healthcare Group Review Board, gave their written informed permission before taking part[12].  
144 In addition, the Declaration of Helsinki was followed during our research. The necessary  
145 standards and legislation were followed in the execution of all procedures, including the  
146 declarations in the Declarations section.

147 Individuals were excluded from the investigation under these conditions: (1) diabetes at  
148 baseline; (2) diabetes or not defined diabetes status at follow-up; (3) abnormal body mass index  
149 (BMI) values (BMI over 55 or less than 15 kg/m<sup>2</sup>); (4) lacking data on baseline fasting plasma  
150 glucose (FPG), FPG at follow-up, height, DBP, gender, weight, and SBP; (5) FPG>6.9mmol/L  
151 during follow-up and FPG≥5.6mmol/L at baseline; (6) follow-up interval < 2 years; (7) PP outliers  
152 (three standard deviations above or below the mean). Finally, 182672 subjects eventually entered  
153 the study. The study's design and participant flow are shown in Figure 1.

### 154 **Data collection**



1  
2  
3  
4 155 Trained staff members gathered and compiled all of the data. Data from laboratory inspections  
5  
6 156 were gathered in the original study under uniform conditions using standardized handling  
7  
8  
9 157 procedures. The skilled personnel, including height, blood pressure, body weight, and age,  
10  
11  
12 158 gathered demographic information. Professional trainees without light clothing and shoes measure  
13  
14 159 individuals for weight and height. Weight/Height<sup>2</sup> (kg/m<sup>2</sup>) was used to compute BMI. Trained  
15  
16  
17 160 staff members took blood pressure using a standard mercury sphygmomanometer. A Beckman  
18  
19 161 5800 autoanalyzer was used to measure laboratory data, such as low-density lipoprotein  
20  
21  
22 162 cholesterol (LDL-C), FPG, total cholesterol (TC), aspartate aminotransferase (AST), blood urea  
23  
24  
25 163 nitrogen (BUN), triglyceride (TG), alanine aminotransferase (ALT), serum creatinine (Scr), and  
26  
27 164 high-density lipoprotein cholesterol (HDL-C). SBP (mmHg) - (DBP (mmHg)) were the formulas  
28  
29  
30 165 used to compute PP.

### 32 166 **Diagnosis of Pre-DM**

34  
35 167 Impaired fasting glucose levels (FPG between 5.6 and 6.9 mmol/L) were used to define  
36  
37  
38 168 Pre-DM[13].

### 40 169 **Patient and Public Involvement**

42  
43 170 Given this was a secondary retrospective cohort study, no patient was involved in the study.

### 45 171 **Statistical analysis**

47  
48 172 R software version 3.4.3 and EmpowerStats (R) version 4.0 were used for all statistical  
49  
50  
51 173 analyses.

52  
53 174 We initially assessed the baseline data distribution by categorizing it into quartiles based on the  
54  
55  
56 175 PP ( $Q1 \leq 36$ ;  $36 < Q2 \leq 43$ ;  $43 < Q3 \leq 50$ ;  $50 < Q4$ ). Continuous data were reported as medians with  
57  
58  
59 176 interquartile ranges (25th-75th percentile) or means with standard deviations (SD), while  
60

1  
2  
3  
4 177 categorical data were expressed as frequencies and percentages. The Kruskal-Wallis H test,  
5  
6 178 chi-square test, and one-way ANOVA were employed to assess disparities between PP groups.  
7  
8  
9 179 The cumulative incidence and terms person-year were used to represent incidence rates[14].  
10  
11 180 Comparisons of survival and cumulative event rates were done using the Kaplan-Meier method.  
12  
13  
14 181 Using the log-rank test, we also examined the Kaplan-Meier hazard ratios (HR) of unfavorable  
15  
16  
17 182 events [15].

18  
19 183 There were 133257 (72.32%), 4240 (2.30%), 1541 (0.84%), 4209 (2.28%), 107684 (58.44%),  
20  
21  
22 184 82879 (44.98%), 18563 (10.07%), 83382 (45.25%), 9759 (5.30%) and 133257 (72.32%)  
23  
24  
25 185 individuals with missing data for smoking status, TG, ALT, TC, AST, LDL-C, BUN, HDL-C,  
26  
27 186 SCr, and drinking status, respectively. The present study employed multiple imputations to handle  
28  
29  
30 187 the missing data of covariants. The imputation model included smoking status, BMI, TG, ALT,  
31  
32  
33 188 TC, AST, LDL-C, BUN, HDL-C, SCr, FPG, sex, family history of diabetes, drinking status, and  
34  
35 189 age. Processes for missing data analysis employ the assumption of missing at random[16].

36  
37  
38 190 This analysis assessed each factor's impact on incident Pre-DM using univariate Cox  
39  
40  
41 191 proportional hazards regression models. The multivariate Cox regression analysis also examined  
42  
43  
44 192 the precise connection between the PP and incident Pre-DM. In addition, we created three models  
45  
46  
47 193 (fully-adjusted, minimally-adjusted, and non-adjusted) to evaluate the connection between PP and  
48  
49  
50 194 incident Pre-DM. Suppose the HR is changed by at least 10% after the covariance is included in  
51  
52  
53 195 the model. At this point, the covariance should be adjusted[17].

54  
55  
56 196 The current analysis conducted several sensitivity analyses to determine if the findings were  
57  
58  
59 197 trustworthy. We converted PP into a categorical variable based on the quartile. We computed the  
60  
198 P for the trend to verify the outcomes of the PP as the continuous variable and test for

1  
2  
3  
4 199 nonlinearity. Obesity and older adults were connected to a greater occurrence of Pre-DM. Thus,  
5  
6 200 we excluded individuals with BMI  $\geq 25\text{kg/m}^2$  or age  $\geq 60$  years for subsequent sensitivity  
7  
8  
9 201 analyses to examine the connection between PP and Pre-DM risk. Additionally, we incorporated  
10  
11 202 the continuous covariate as a curve to the equation using a generalized additive model (GAM) to  
12  
13  
14 203 confirm the validity of the results. We also calculated E-values to examine the possibility of  
15  
16  
17 204 unmeasured confounding between PP and the risk of prediabetes

18  
19 205 We used Cox proportional hazards regression with cubic spline functions and smooth curve  
20  
21  
22 206 fitting to explore the nonlinear relationship between PP and Pre-DM. We first utilized a recursive  
23  
24  
25 207 technique to locate the inflection point if a non-linear relationship was discovered[18]. The  
26  
27  
28 208 recursive algorithm commences with an arbitrary initialization and subsequently undergoes a  
29  
30  
31 209 series of filtering and smoothing steps in order to identify the inflection point accurately.  
32  
33  
34 210 Following this, we construct a two-piece Cox proportional hazards regression model, separately  
35  
36  
37 211 analyzing the data on either side of the inflection point. Ultimately, the study determined the most  
38  
39  
40 212 appropriate model for PP's connection with Pre-DM through log-likelihood ratio analysis.

41 213 Subgroup analysis, utilizing the Cox proportional hazard model, was also conducted. Firstly,  
42  
43 214 these variables were selected based on a combination of clinical relevance, literature review, and  
44  
45  
46 215 the availability of data within our cohort. Secondly, the interaction test between these variables  
47  
48  
49 216 and PP was performed before the subgroup analysis. The likelihood ratio test was used to compare  
50  
51  
52 217 models with and without the multiplicative interaction term. Secondly, stratification was  
53  
54  
55 218 performed based on medians or established clinical cut points[19], and variables such as age ( $<60$ ,  
56  
57  
58 219  $\geq 60$  years) and BMI ( $<25$ ,  $\geq 25$  kg/m<sup>2</sup>) were converted into categorical factors. Thirdly, a fully  
59  
60 220 adjusted analysis was performed for each stratum, except for the stratification factor. Ultimately,

1  
2  
3  
4 221 the likelihood ratio test was used to determine whether interaction terms existed in models with  
5  
6 222 and without interaction terms[20, 21]. The study adhered to the STROBE statement for all  
7  
8  
9 223 outcomes[17, 22]. Statistical significance was determined by a P-value < 0.05, using two-tailed  
10  
11  
12 224 tests.

## 14 225 **Results**

### 17 226 **Characteristics of individuals**

19 227 In the current research, 182672 individuals deemed free of Pre-DM at baseline were included.  
21  
22 228 The average age was  $40.832 \pm 11.864$  years, and 53.082% of individuals were male. Twenty  
23  
24 229 thousand two hundred eighty-four individuals eventually got Pre-DM after an average of 3.143  
25  
26  
27 230 years of follow-up. Table 1 displays comprehensive clinical measurements, biochemical tests, and  
28  
29  
30 231 various parameters. We categorized participants into subgroups based on PP quartiles ( $Q1 \leq 36$ ;  
31  
32 232  $36 < Q2 \leq 43$ ;  $43 < Q3 \leq 50$ ;  $50 < Q4$ ). Compared to the Q1 group, the other groups (Q2 group, Q3  
33  
34  
35 233 group, Q4 group) had higher ALT, BMI, age, TG, Scr, TC, AST, BUN, LDL-C, and lower  
36  
37  
38 234 HDL-C. Additionally, the Q4 group had a higher proportion of men, smokers, and drinkers.

### 40 235 **The incidence rate of Pre-DM**

42  
43 236 During the follow-up, 20284 individuals developed incident Pre-DM, as outlined in  
44  
45  
46 237 Supplemental Table 1. All people had a prevalence rate of 11.10%. The four PP groups'  
47  
48 238 prevalence rates were 8.92%, 9.47% (9.21%–9.73%), 10.82%, and 14.58%. In addition, the  
49  
50  
51 239 cumulative incidence rate of the overall population and four PP groups were 3532.68, 2779.24,  
52  
53 240 2999.95, 3470.06, and 4701.37 per 100,000 person-years, respectively. Individuals in the Q2, Q3,  
54  
55  
56 241 and Q4 groups exhibited significantly greater cumulative incidence and prevalence rates of  
57  
58  
59 242 Pre-DM than those in the Q1 group.  
60

1  
2  
3  
4 243 The Kaplan-Meier curves for the propensity to survive without Pre-DM are shown in  
5  
6 244 Supplemental Figure 1. There was a significant difference between the four PP groups regarding  
7  
8  
9 245 the likelihood of developing Pre-DM ( $P<0.001$ ). As PP levels increased, the chance of living  
10  
11 246 without prediabetes steadily dropped. As a result, Pre-DM risk was highest among those in the  
12  
13  
14 247 highest PP categories.

### 248 **Univariate analysis**

19 249 Supplemental Table 2 presents the findings of the univariate analysis. DBP, TC, BMI, SBP,  
20  
21  
22 250 FPG, age, TG, SCr, LDL-C, PP, and BUN were correlated with Pre-DM risk. HDL-C exhibits an  
23  
24  
25 251 inverse relationship with Pre-DM risk. Individuals who never drink or smoke also have a lower  
26  
27 252 risk of developing pre-DM. Pre-DM risk was shown to be greater in men than in women.

### 253 **The results of the connection between PP and Pre-DM**

32 254 The Cox proportional hazard regression models for the association between PP and Pre-DM are  
33  
34  
35 255 shown in Table 2. In the non-adjusted model, the HR (95%CI) for the relationship between  
36  
37  
38 256 Pre-DM and PP was 1.025 (1.023-1.026). The HR (95%CI) in the minimally-adjusted model was  
39  
40  
41 257 1.013 (1.011-1.014) after adjusting for smoking status, age, BMI, family history of diabetes,  
42  
43 258 gender, and drinking status. The HR (95%CI) was 1.009 (1.007-1.010) in the fully-adjusted model  
44  
45  
46 259 after controlling for smoking status, BMI, TG, ALT, TC, AST, LDL-C, BUN, HDL-C, SCr, sex,  
47  
48 260 FPG, family history of diabetes, drinking status, and age. The findings showed that for every  
49  
50  
51 261 1mmHg rise in PP, the risk of Pre-DM rose by 0.9%.

### 262 **Sensitivity analyses**

56 263 We used several sensitivity analyses to evaluate how reliable our results were. PP was changed  
57  
58  
59 264 from a continuous to a categorical variable before being reintroduced into the model. Following  
60

1  
2  
3  
4 265 the translation of PP into categorical variables, the trend p was not equal, suggesting a potential  
5  
6 266 nonlinear connection between PP and the chance of developing Pre-DM. Additionally, a GAM  
7  
8  
9 267 added the continuity covariate to the equation. Results for the GAM model showed a positive  
10  
11  
12 268 connection between PP and the probability of developing Pre-DM (HR: 1.008,  
13  
14 269 95%CI:1.007-1.010) (Table 2).

17 270 Besides, the current research excluded participants with BMI<25kg/m<sup>2</sup> for sensitivity analysis.  
18  
19 271 After controlling for confounding factors, we observed a positive association between PP and  
20  
21  
22 272 Pre-DM risk (HR: 1.011, 95%CI: 1.009-1.013) (Supplemental Table 3). Moreover, we considered  
23  
24 273 participants with ages < 60 years for sensitivity studies. After adjusting for smoking status, BMI,  
25  
26  
27 274 TG, ALT, TC, AST, LDL-C, BUN, HDL-C, SCr, sex, FPG, family history of diabetes, drinking  
28  
29  
30 275 status, and age, the results showed that PP remained positively correlated with the likelihood of  
31  
32  
33 276 developing Pre-DM (HR: 1.008, 95%CI: 1.007-1.010). (Supplemental Table 3). According to the  
34  
35 277 sensitivity analysis, our findings appeared to be solid.

37 278 Additionally, an E-value was computed to assess the vulnerability of the study results to  
38  
39 279 potential unobserved confounding factors. The resulting E-value (1.21) demonstrated a higher  
40  
41  
42 280 level of statistical significance in comparison to the relative risk (1.05) associated with  
43  
44 281 unmeasured confounders and PP. This suggests that the impact of unmeasured or unidentified  
45  
46  
47 282 confounders on the relationship between PP and the occurrence of Pre-DM was negligible.

### 283 **The analysis of the nonlinear connection**

52  
53 284 The nonlinear connection between PP and incident Pre-DM is illustrated in Figure 2. After  
54  
55  
56 285 correcting for confounding factors, there was a nonlinear link between PP and incident Pre-DM  
57  
58  
59 286 (Table 3). Based on a two-piecewise Cox proportional hazards regression model, the PP's  
60

1  
2  
3  
4 287 inflection point was 29 mmHg (P for log-likelihood ratio test = 0.008). When PP was more than  
5  
6  
7 288 29 mmHg, PP was strongly linked with incident Pre-DM (HR:1.009, 95%CI: 1.008-1.011,  
8  
9 289 P<0.001). However, their correlation was not significant when PP was less than 29 mmHg (HR:  
10  
11 290 0.990, 95%CI: 0.977-1.003, P=0.149).

### 291 **The results of the subgroup analysis**

292 Interaction tests performed before subgroup analyses showed that age, BMI, gender, family  
293 history of diabetes, smoking status, and drinking status interacted with PP (P<0.001)  
294 (Supplemental Table 4). We selected age, BMI, gender, family history of diabetes, smoking status,  
295 and drinking status as stratification variables and examined the changes in their impact sizes  
296 (Supplemental Table 5). Age, drinking status, and family history of diabetes had no impact on the  
297 correlation between PP and the risk of prediabetes. Females, never smokers, ever smokers, and  
298 subjects with BMI<25 kg/m<sup>2</sup> were more likely to be associated with prediabetes risk. Conversely,  
299 there was a weaker connection in males, current smokers, and individuals with BMI≥25 kg/m<sup>2</sup>.

### 300 **Discussion**

301 The current study's main goal was to investigate the connection between PP and incident  
302 Pre-DM in Chinese participants. The findings demonstrated a correlation between increased PP  
303 and a higher risk of prediabetes. The correlation between PP and Pre-DM was also investigated on  
304 the left and right sides of the inflection point. PP level and incident prediabetes have a nonlinear  
305 relationship. It was found that never-smokers, ever-smokers, females, and individuals with  
306 BMI<25 kg/m<sup>2</sup> had a greater correlation between PP and incident Pre-DM.

307 PP, the arithmetic difference between SBP and DBP, is determined by arterial wall elasticity  
308 and is related to all-cause mortality, cardiovascular events, stroke, kidney injury, severe eye

1  
2  
3  
4 309 illness, and arterial stiffness[23-28]. In comparison to blood pressure, PP has a better predictive  
5  
6 310 capacity for poor cardiovascular outcomes in people with diabetes, according to several previous  
7  
8  
9 311 pieces of evidence[6, 29]. In addition, some studies found that PP demonstrated strong predictive  
10  
11 312 ability in the homeostatic model assessment of insulin resistance index, diabetes, and metabolic  
12  
13  
14 313 syndrome[30-32]. In a retrospective study involving 211814 Chinese participants, after controlling  
15  
16  
17 314 for BMI, smoking and drinking status, age, TC, gender, family history of diabetes, FPG, TG, and  
18  
19  
20 315 BUN and ALT, Higher PP levels independently connect with increased T2DM risk (HR:1.003,  
21  
22 316 95%CI:1.001,1.005)[11]. In a longitudinal study involving 12272 Chinese, Zhang L et al.[30]  
23  
24  
25 317 found that high PP in Chinese women may be related to the development of T2DM after adjusting  
26  
27  
28 318 for confounding covariates. In a national cross-sectional study involving 6187 Korean older  
29  
30  
31 319 adults, Kwon YJ et al.[32] discovered a positive association between PP and metabolic syndrome  
32  
33 320 after adjusting for alcohol consumption, smoking, age, regular exercise, and mean arterial blood  
34  
35  
36 321 pressure. In another cross-sectional cohort study that included 38708 rural Chinese participants,  
37  
38  
39 322 compared with the lowest group, the odds ratio (95%CI) of PP in the highest quartile of risk for  
40  
41  
42 323 metabolic syndrome was found to be 1.81 (1.67-1.95) after controlling for confounders[33]. In  
43  
44  
45 324 addition, in a prospective research enrolling 32917 Chinese, the HR (95%CI) for diabetes in the  
46  
47  
48 325 Q3 and Q4 groups were 1.13 (1.04-1.22) and 1.14 (1.05-1.24), respectively, after adjusting for  
49  
50  
51 326 covariates compared to the Q1 group[34]. However, in a multicenter, longitudinal cohort study  
52  
53  
54 327 that included 18619 adults, high PP was not related to an increased risk of diabetes after adjusting  
55  
56  
57 328 for BMI, mean arterial pressure, gender, high-sensitivity C reactive protein, age, exercise,  
58  
59  
60 329 smoking, blood pressure lowering agents, drinking, hyperlipidemia, and family history of  
330 diabetes[35]. A retrospective study of 178 individuals with hypertension found that PP was not



1  
2  
3  
4 331 associated with the risk of new-onset diabetes after adjusting for potential confounders[36]. This  
5  
6 332 retrospective cohort study involved 182672 Chinese individuals and revealed a higher incidence of  
7  
8  
9 333 prediabetes at increased PP levels. After adjusting for smoking status, BMI, TG, ALT, TC, AST,  
10  
11 334 LDL-C, BUN, HDL-C, SCr, sex, FPG, family history of diabetes, drinking status, and age, the  
12  
13  
14 335 results indicated that each unit of the LAP raised the risk of prediabetes by 0.9%. Moreover,  
15  
16  
17 336 sensitivity analysis has demonstrated that this correlation remains observable in Chinese adults  
18  
19 337 with age <60 years or BMI <25 kg/m<sup>2</sup>. The efforts mentioned above have demonstrated the  
20  
21  
22 338 consistency of the connection between PP and Pre-DM risk. The findings offered a clinical  
23  
24  
25 339 PP-level intervention guideline to decrease Pre-DM risk.

26  
27 340 Few previous studies have investigated the probable curvilinear link between PP and  
28  
29  
30 341 prediabetes. The current study first examined the nonlinear association between PP and  
31  
32  
33 342 prediabetes. After controlling for smoking status, BMI, TG, ALT, TC, AST, LDL-C, BUN,  
34  
35  
36 343 HDL-C, SCr, sex, FPG, family history of diabetes, drinking status, and age, the findings revealed  
37  
38 344 that the connection between PP and prediabetes was nonlinear. Based on a two-piecewise Cox  
39  
40  
41 345 proportional hazards regression model, we identified the inflection point of PP as 29 mmHg.  
42  
43 346 When PP levels exceeded 29 mmHg, a 1-unit increase in PP correlated with a 0.9% increase in the  
44  
45  
46 347 hazard ratio (HR) for individuals with Pre-DM (HR: 1.009, 95% CI: 1.008-1.011, P<0.001).  
47  
48 348 However, no significant correlation was observed between PP levels below 29 mmHg and the  
49  
50  
51 349 incident Pre-DM (HR: 0.990, 95% CI: 0.977-1.003, P = 0.149). Elevated PP serves as a valuable  
52  
53  
54 350 indicator for identifying high-risk participants likely to develop Pre-DM during follow-up.  
55  
56 351 Moreover, our analysis revealed that the relationship between PP and the emergence of Pre-DM  
57  
58  
59 352 was more pronounced in never-smokers, ever-smokers, females, and individuals with BMI< 25  
60

1  
2  
3  
4 353 kg/m<sup>2</sup>. In contrast, this association appeared attenuated in males, current smokers, and individuals  
5  
6  
7 354 with BMI  $\geq$  25 kg/m<sup>2</sup>. Prior research has consistently identified obesity, smoking, and male as  
8  
9 355 contributors to insulin resistance[37, 38], which is a precursor to Pre-DM. We postulated that the  
10  
11 356 attenuated association observed in these subgroups may be attributable to the overriding influence  
12  
13  
14 357 of these risk factors on the pathogenesis of Pre-DM. The direct impact of PP on prediabetes risk  
15  
16  
17 358 may be somewhat eclipsed by the more substantial effects of obesity, active smoking, and the  
18  
19 359 male sex on insulin resistance and subsequent Pre-DM development. This information can remind  
20  
21  
22 360 individuals to adopt healthier lifestyle habits sooner, ultimately improving their outcomes.  
23  
24

25 361 The mechanism behind the association between PP and prediabetes is yet unknown. Several  
26  
27 362 explanations currently exist for PP leading to Pre-DM. Firstly, endothelial cell dysfunction may  
28  
29  
30 363 result in microvascular dysfunction[39], which in turn causes dysfunctional glucose metabolism,  
31  
32  
33 364 insulin resistance, poor tissue perfusion, and arterial stiffness[40-42]. Additionally, arterial  
34  
35 365 stiffness may exacerbate microvascular lesions, creating a vicious cycle[43, 44]. Secondly, normal  
36  
37  
38 366 arteries can reduce PP, but arterial stiffness increases blood flow through low-resistance organs  
39  
40  
41 367 (such as the kidney and brain), which will cause organ dysfunction[45]. As a low-resistance,  
42  
43 368 high-blood-flow organ with a mean tissue perfusion of 250–300 ml/min/100g, the pancreas may  
44  
45 369 be negatively impacted by arterial stiffness in terms of its endocrine function.  
46  
47

48 370 The current research possesses several notable advantages. Firstly, we delved deeper into the  
49  
50  
51 371 nonlinear relationship between PP and prediabetes. Secondly, we minimized the impact of residual  
52  
53 372 confounding factors through rigorous statistical adjustments. Thirdly, we conducted sensitivity  
54  
55  
56 373 analyses to ensure the robustness of our findings. Lastly, we performed a group analysis to  
57  
58  
59 374 evaluate other potential risk covariates that could affect the link between PP and Pre-DM.  
60

1  
2  
3  
4 375 The present study has certain limitations. First, this study is based on a Chinese population, and  
5  
6 376 while it offers valuable insights, the findings might not be directly generalizable to other  
7  
8  
9 377 populations due to genetic, lifestyle, and environmental differences. In the future, we will explore  
10  
11 378 the relationship between PP and prediabetes risk in diverse populations. Second, as our study was  
12  
13  
14 379 a secondary analysis, we cannot guarantee data quality monitoring and variable control. In  
15  
16  
17 380 forthcoming research endeavors, we will endeavor to construct prospective cohort studies with  
18  
19 381 enhanced data quality oversight and variable control, thereby mitigating bias. Third, excluding  
20  
21  
22 382 over 500,000 individuals from a final cohort of 182,672 subjects could have selection bias and  
23  
24  
25 383 implications for generalisability. In the future, we will design prospective studies in a more  
26  
27 384 diverse population to validate our findings. Fourth, prediabetes was defined based on impaired  
28  
29  
30 385 fasting glucose levels in our study. This could potentially lead to underestimation of prediabetes  
31  
32  
33 386 incidence. This is a secondary retrospective study, and the raw data did not provide information  
34  
35  
36 387 regarding 2-hour oral glucose tolerance test or glycosylated hemoglobin level measurements. In  
37  
38 388 the future, we will consider designing our study to document more variables, including 2-hour oral  
39  
40  
41 389 glucose tolerance test or glycosylated hemoglobin level measurements. Fifth, as with all  
42  
43  
44 390 observational studies, there may be uncontrolled or unmeasured confounding factors, such as diet,  
45  
46  
47 391 exercise, atherosclerosis, the use of antihypertensive medications, and the presence of  
48  
49  
50 392 hypertension, despite controlling for known potential confounders like BMI, TC, LDL-C, AST,  
51  
52  
53 393 ALT, Scr, BUN, and FPG. However, we used the E-value to evaluate the impact of unmeasured  
54  
55  
56 394 confounders and determined it unlikely that they fully explained the results. Sixth, SBP and DBP  
57  
58  
59 395 were only measured at baseline in the original study, and we did not assess how SBP and DBP  
60  
396 changed over time. In the future, we will consider designing our own study and documenting more

1  
2  
3  
4 397 information, such as diet, exercise, atherosclerosis, antihypertensive medications, the presence of  
5  
6 398 hypertension and changes in blood pressure over time, and then utilizing a GAM model to explore  
7  
8  
9 399 the impact of changes in PP on Pre-DM risk.

## 400 **Conclusion**

401 This cohort study of the Chinese population shows that PP was inversely and non-linearly  
402 associated with the incidence of Pre-DM after adjusting for other confounding factors. High PP  
403 levels were related to Pre-DM risk when PP was above 29 mmHg. From a therapeutic standpoint,  
404 lowering the PP below the inflection point represents a cost-effective and straightforward  
405 approach for the early prevention and intervention of Pre-DM.

## 407 **Declarations**

### 408 **Ethics approval and consent to participate**

409 The original study followed guidelines outlined by the Helsinki Declaration and was approved by  
410 the Rich Healthcare Group Review Board. In addition, the Rich Healthcare Group Review Board  
411 has waived informed consent for the current retrospective study. All methods were performed in  
412 accordance with the relevant Declaration of Helsinki.

### 413 **Consent for publication**

414 Not applicable.

### 415 **Availability of data and materials**

416 The authors confirm that the data supporting the findings of this study are available within the  
417 article [and/or its supplementary materials].

### 418 **Competing interests**

1  
2  
3  
4 419 The authors declare that they have no competing interests.  
5

## 6 420 **Funding**

7  
8  
9 421 This study was supported by the Natural Science Funding of China (No.82272598, No.81901470),  
10  
11 422 and the Natural Science Foundation of Guangdong Province, China (No. 2020A1515011203).

12  
13  
14 423 This study was also supported by the Science, Technology and Innovation Commission of  
15  
16  
17 424 Shenzhen (JCYJ20210324135804012, JCYJ20220530150407015).

## 18 19 425 **Author contributions**

20  
21  
22 426 Changchun Cao and Yong Han contributed to the study concept and design, researched and  
23  
24  
25 427 interpreted the data, and drafted the manuscript. Haofei Hu, Yongcheng He, and Jiao Luo  
26  
27  
28 428 analyzed the data and reviewed the manuscript. Changchun Cao and Yong Han oversaw the  
29  
30  
31 429 project's progress, contributed to the discussion, and reviewed the manuscript. Haofei Hu,  
32  
33 430 Yongcheng He, and Jiao Luo were the guarantors of this work. As such, they had full access to all  
34  
35  
36 431 data in the study and were responsible for the data integrity and analysis accuracy. All authors  
37  
38 432 read and approved the final manuscript.

## 39 40 433 **Acknowledgments**

41  
42  
43 434 Not applicable.  
44  
45  
46 435  
47  
48 436  
49  
50  
51 437  
52  
53 438  
54  
55  
56 439  
57  
58 440  
59  
60

441 **Table 1** The Baseline Characteristics of Participants

| PP                         | Q1(≤36)           | Q2(36 to ≤43)     | Q3(43 to ≤50)     | Q4(>50)           | P-value |
|----------------------------|-------------------|-------------------|-------------------|-------------------|---------|
| Participants               | 39914             | 47771             | 43811             | 51176             |         |
| Gender                     |                   |                   |                   |                   | <0.001  |
| Male                       | 16960 (42.491%)   | 22739 (47.600%)   | 24830 (56.675%)   | 32437 (63.383%)   |         |
| Female                     | 22954 (57.509%)   | 25032 (52.400%)   | 18981 (43.325%)   | 18739 (36.617%)   |         |
| Age(years)                 | 39.837 ± 9.945    | 39.905 ± 10.269   | 40.186 ± 11.236   | 43.028 ± 14.560   | <0.001  |
| Drinking status            |                   |                   |                   |                   |         |
| Current-drinker            | 526 (1.318%)      | 712 (1.490%)      | 682 (1.557%)      | 1004 (1.962%)     |         |
| Ex-drinker                 | 3923 (9.829%)     | 5436 (11.379%)    | 5777 (13.186%)    | 7498 (14.651%)    |         |
| Never- drinker             | 35465 (88.854%)   | 41623 (87.130%)   | 37352 (85.257%)   | 42674 (83.387%)   |         |
| Smoking status             |                   |                   |                   |                   | <0.001  |
| Current-smoker             | 5468 (13.699%)    | 7191 (15.053%)    | 7324 (16.717%)    | 9441 (18.448%)    |         |
| Ex-smoker                  | 1164 (2.916%)     | 1536 (3.215%)     | 1707 (3.896%)     | 2159 (4.219%)     |         |
| Never-smoker               | 33282 (83.384%)   | 39044 (81.732%)   | 34780 (79.386%)   | 39576 (77.333%)   |         |
| Family history of diabetes |                   |                   |                   |                   | <0.001  |
| No                         | 38974 (97.645%)   | 46764 (97.892%)   | 42922 (97.971%)   | 50379 (98.443%)   |         |
| Yes                        | 940 (2.355%)      | 1007 (2.108%)     | 889 (2.029%)      | 797 (1.557%)      |         |
| SBP (mmHg)                 | 104.383 ± 10.737  | 111.554 ± 10.604  | 119.000 ± 10.592  | 131.740 ± 12.760  | <0.001  |
| DBP (mmHg)                 | 73.782 ± 10.685   | 72.461 ± 10.398   | 73.164 ± 10.347   | 74.508 ± 10.733   | <0.001  |
| BMI (kg/m <sup>2</sup> )   | 22.205 ± 3.119    | 22.654 ± 3.134    | 23.100 ± 3.184    | 23.773 ± 3.358    | <0.001  |
| AST(U/L)                   | 21.2 (17, 26.6)   | 21.5 (17.2, 27)   | 22 (17.7, 27.8)   | 23(18.1, 28.7)    | <0.001  |
| ALT (U/L)                  | 16 (11.6, 24)     | 16.6(12, 25.3)    | 18 (12, 27.4)     | 19.3(14, 29)      | <0.001  |
| HDL-C (mmol/L)             | 1.394 ± 0.312     | 1.384 ± 0.310     | 1.365 ± 0.304     | 1.351 ± 0.303     | <0.001  |
| TG (mmol/L)                | 0.94 (0.67, 1.40) | 0.99 (0.70, 1.47) | 1.04 (0.72, 1.55) | 1.12 (0.79, 1.69) | <0.001  |
| LDL-C (mmol/L)             | 2.651 ± 0.656     | 2.663 ± 0.660     | 2.685 ± 0.671     | 2.734 ± 0.690     | <0.001  |
| TC (mmol/L)                | 4.617 ± 0.858     | 4.632 ± 0.863     | 4.659 ± 0.880     | 4.725 ± 0.916     | <0.001  |
| BUN (mmol/L)               | 4.502 ± 1.142     | 4.538 ± 1.148     | 4.612 ± 1.156     | 4.732 ± 1.199     | <0.001  |
| SCr (umol/L)               | 67.116 ± 14.932   | 68.284 ± 15.134   | 70.240 ± 15.137   | 72.093 ± 16.223   | <0.001  |
| FPG (mmol/L)               | 4.691 ± 0.513     | 4.730 ± 0.497     | 4.772 ± 0.480     | 4.849 ± 0.450     | <0.001  |
| PP (mmHg)                  | 30.601 ± 3.971    | 39.093 ± 1.979    | 45.836 ± 1.986    | 57.232 ± 6.395    | <0.001  |

442 Values are n (%) or mean ± SD

443 PP: pulse pressure, SBP systolic blood pressure, DBP diastolic blood pressure, BMI body mass index, ALT

444 alanine aminotransferase, AST aspartate aminotransferase, HDL-C high-density lipoprotein cholesterol, LDL-C

445 low-density lipoprotein cholesterol, TC total cholesterol, TG triglycerides, Scr serum creatinine, BUN blood urea

446 nitrogen, FPG fasting plasma glucose

447

448

449

450

451

452

453

454 **Table 2** Relationship between PP and incident prediabetes in different models

| Variable                      | Non-adjusted model<br>(HR,95% CI, P) | Minimally-adjusted<br>model (HR,95% CI,<br>P) | Fully-adjusted model<br>(HR,95% CI, P) | GAM<br>(HR,95% CI, P)          |
|-------------------------------|--------------------------------------|-----------------------------------------------|----------------------------------------|--------------------------------|
| <b>Total</b>                  | 1.025 (1.023, 1.026)                 | 1.013 (1.011, 1.014)                          | 1.009 (1.007, 1.010)                   | 1.008 (1.007, 1.010)           |
| PP                            | <0.001                               | <0.001                                        | <0.001                                 | <0.001                         |
| PP (quartile)                 |                                      |                                               |                                        |                                |
| Q1                            | ref                                  | ref                                           | ref                                    | ref                            |
| Q2                            | 1.125 (1.077, 1.176)<br><0.001       | 1.070 (1.024, 1.118)<br>0.003                 | 1.043 (0.998, 1.090)<br>0.061          | 1.046 (1.001, 1.093)<br>0.045  |
| Q3                            | 1.347 (1.290, 1.407)<br><0.001       | 1.208 (1.156, 1.262)<br><0.001                | 1.131 (1.083, 1.181)<br><0.001         | 1.129 (1.080, 1.179)<br><0.001 |
| Q4                            | 1.860 (1.787, 1.935)<br><0.001       | 1.408 (1.352, 1.467)<br><0.001                | 1.246 (1.197, 1.298)<br><0.001         | 1.238 (1.188, 1.291)<br><0.001 |
| P for trend                   | <0.001                               | <0.001                                        | <0.001                                 | <0.001                         |
| Gender                        |                                      |                                               |                                        |                                |
| Male                          |                                      | ref                                           | ref                                    |                                |
| Female                        |                                      | 0.777 (0.751, 0.803)<br><0.001                | 0.877 (0.843, 0.913)<br><0.001         |                                |
| Age(years)                    |                                      | 1.027 (1.026, 1.028)<br><0.001                | 1.022 (1.021, 1.023)<br><0.001         |                                |
| Drinking status               |                                      |                                               |                                        |                                |
| Current-drinker               |                                      | ref                                           | ref                                    |                                |
| Ex-drinker                    |                                      | 0.965 (0.877, 1.061)<br>0.457                 | 1.013 (0.920, 1.114)<br>0.799          |                                |
| Never- drinker                |                                      | 0.911 (0.832, 0.997)<br>0.042                 | 1.075 (0.981, 1.178)<br>0.122          |                                |
| Smoking status                |                                      |                                               |                                        |                                |
| Current-smoker                |                                      | ref                                           | ref                                    |                                |
| Ex-smoker                     |                                      | 1.020 (0.948, 1.097)<br>0.596                 | 1.021 (0.949, 1.098)<br>0.578          |                                |
| Never-smoker                  |                                      | 1.055 (1.016, 1.095)<br>0.005                 | 1.023 (0.985, 1.062)<br>0.246          |                                |
| Family history of<br>diabetes |                                      |                                               |                                        |                                |
| No                            |                                      | ref                                           | ref                                    |                                |
| Yes                           |                                      | 1.157 (1.058, 1.265)<br>0.001                 | 1.120 (1.024, 1.225)<br>0.013          |                                |
| BMI (kg/m <sup>2</sup> )      |                                      | 1.091 (1.086, 1.095)<br><0.001                | 1.060 (1.055, 1.065)<br><0.001         |                                |
| AST(U/L)                      |                                      |                                               | 0.999 (0.997, 1.000)<br>0.150          |                                |
| ALT (U/L)                     |                                      |                                               | 1.003 (1.002, 1.004)<br><0.001         |                                |

|                |                      |
|----------------|----------------------|
| HDL-C (mmol/L) | 1.429 (1.353, 1.509) |
|                | <0.001               |
| TG (mmol/L)    | 1.145 (1.129, 1.161) |
|                | <0.001               |
| LDL-C (mmol/L) | 1.309 (1.248, 1.373) |
|                | <0.001               |
| TC (mmol/L)    | 0.772 (0.741, 0.803) |
|                | <0.001               |
| BUN (mmol/L)   | 0.976 (0.964, 0.988) |
|                | <0.001               |
| SCr (umol/L)   | 1.003 (1.002, 1.004) |
|                | <0.001               |
| FPG (mmol/L)   | 4.613 (4.451, 4.780) |
|                | <0.001               |

455 Crude model: we did not adjust for other covariants.  
 456 Minimally-adjusted model: we adjusted for gender, age, family history of diabetes, drinking status, smoking status, and BMI.  
 457 Fully-adjusted model: we adjusted for gender, age, family history of diabetes, drinking status, smoking status, BMI, TC, TG,  
 458 HDL-C, LDL-C, AST, ALT, SCr, BUN, and FPG.  
 459 GAM: All covariates listed in Table 1 were adjusted. However, continuous covariates were adjusted as nonlinearity.  
 460 HR, hazard ratios; CI, confidence interval; Ref, reference; GAM, generalized additive mode; PP, pulse pressure.

461  
462  
463  
464  
465  
466  
467  
468  
469  
470  
471  
472  
473  
474  
475  
476  
477  
478  
479  
480  
481  
482  
483  
484



485 **Table 3** The result of the two-piecewise Cox proportional hazards regression model

| Incident prediabetes                                               | HR (95%CI)           | P      |
|--------------------------------------------------------------------|----------------------|--------|
| Fitting model by standard linear regression                        | 1.009 (1.007, 1.010) | <0.001 |
| Fitting model by two-piecewise Cox proportional hazards regression |                      |        |
| The inflection point of PP (mmHg)                                  | 29                   |        |
| ≤29                                                                | 0.990 (0.977, 1.003) | 0.149  |
| >29                                                                | 1.009 (1.008, 1.011) | <0.001 |
| P for the log-likelihood ratio test                                | 0.008                |        |

486 We adjusted for gender, age, family history of diabetes, drinking status, smoking status, BMI, TC, TG, HDL-C, LDL-C, AST,  
487 ALT, SCr, BUN, and FPG.

488 HR, hazard ratios; CI, confidence; PP: pulse pressure

489

490

491

492

493

494

495

496

497

498

499

500

501

502

503

504

505

506

507

508

509

510

511

512

513

514

515

1  
2  
3  
4 516 **Figure 1** Study Population  
5

6 517 **Figure 2** The nonlinear relationship between PP and incident prediabetes. A  
7  
8  
9 518 nonlinear relationship between PP and incident prediabetes was detected after  
10  
11  
12 519 adjusting for smoking status, BMI, TG, ALT, TC, AST, LDL-C, BUN, HDL-C, SCr,  
13  
14 520 sex, FPG, family history of diabetes, drinking status, and age.  
15  
16

17 521

18  
19 522

20 523

21 524

22 525

23  
24  
25 526

26  
27  
28 527

29  
30 528

31  
32  
33 529

34  
35 530

36  
37  
38 531

39  
40  
41 532

42  
43 533

44  
45  
46 534

47  
48 535

49  
50 536

51  
52  
53 537

54  
55  
56 538

57  
58  
59 539  
60

## References:

1. Ali MK, Bullard KM, Saydah S, Imperatore G, Gregg EW: **Cardiovascular and renal burdens of prediabetes in the USA: analysis of data from serial cross-sectional surveys, 1988-2014.** *LANCET DIABETES ENDO* 2018, **6**(5):392-403.
2. Yang W, Lu J, Weng J, Jia W, Ji L, Xiao J, Shan Z, Liu J, Tian H, Ji Q *et al*: **Prevalence of diabetes among men and women in China.** *NEW ENGL J MED* 2010, **362**(12):1090-1101.
3. Li Y, Teng D, Shi X, Qin G, Qin Y, Quan H, Shi B, Sun H, Ba J, Chen B *et al*: **Prevalence of diabetes recorded in mainland China using 2018 diagnostic criteria from the American Diabetes Association: national cross sectional study.** *BMJ-BRIT MED J* 2020, **369**:m997.
4. Tabak AG, Herder C, Rathmann W, Brunner EJ, Kivimaki M: **Prediabetes: a high-risk state for diabetes development.** *LANCET* 2012, **379**(9833):2279-2290.
5. Somaratne JB, Whalley GA, Poppe KK, ter Bals MM, Wadams G, Pearl A, Bagg W, Doughty RN: **Screening for left ventricular hypertrophy in patients with type 2 diabetes mellitus in the community.** *CARDIOVASC DIABETOL* 2011, **10**:29.
6. Kodama S, Horikawa C, Fujihara K, Yoshizawa S, Yachi Y, Tanaka S, Ohara N, Matsunaga S, Yamada T, Hanyu O *et al*: **Meta-analysis of the quantitative relation between pulse pressure and mean arterial pressure and cardiovascular risk in patients with diabetes mellitus.** *AM J CARDIOL* 2014, **113**(6):1058-1065.
7. Laugesen E, Knudsen ST, Hansen KW, Rossen NB, Poulsen PL: **Invasive aortic pulse pressure is not superior to cuff pulse pressure in cardiovascular risk prediction.** *J HYPERTENS* 2020, **Publish Ahead of Print**.
8. Rojas RJ, Chavez-Sosa JV, Gutierrez-Ajalcrina R, Huancahuire-Vega S: **Association between dehydroepiandrosterone levels and cardiovascular risk in public sector health workers in a Peruvian region.** *CARDIOVASC ENDOCR ME* 2021, **10**(1):51-55.
9. Lee CJ, Yoon M, Ha J, Oh J, Park S, Lee SH, Kang SM: **Comparison of the Association Between Arterial Stiffness Indices and Heart Failure in Patients With High Cardiovascular Risk: A Retrospective Study.** *FRONT CARDIOVASC MED* 2021, **8**:782849.
10. Acar B, Ozeke O, Karakurt M, Ozen Y, Ozbay MB, Unal S, Karanfil M, Yayla C, Cay S, Maden O *et al*: **Association of Prediabetes With Higher Coronary Atherosclerotic Burden Among Patients With First Diagnosed Acute Coronary Syndrome.** *ANGIOLOGY* 2019, **70**(2):174-180.
11. Wu C, Ma D, Chen Y: **Association of Pulse Pressure Difference and Diabetes Mellitus in Chinese People: A Cohort Study.** *INT J GEN MED* 2021, **14**:6601-6608.
12. Chen Y, Zhang XP, Yuan J, Cai B, Wang XL, Wu XL, Zhang YH, Zhang XY, Yin T, Zhu XH *et al*: **Association of body mass index and age with incident diabetes in Chinese adults: a population-based cohort study.** *BMJ OPEN* 2018, **8**(9):e21768.
13. **2. Classification and Diagnosis of Diabetes: Standards of Medical Care in Diabetes-2018.** *DIABETES CARE* 2018, **41**(Suppl 1):S13-S27.
14. Qin H, Chen Z, Zhang Y, Wang L, Ouyang P, Cheng L, Zhang Y: **Triglyceride to high-density lipoprotein cholesterol ratio is associated with incident diabetes in men: A retrospective study of Chinese individuals.** *J DIABETES INVEST* 2020, **11**(1):192-198.
15. Robson ME, Tung N, Conte P, Im SA, Senkus E, Xu B, Masuda N, Delaloge S, Li W, Armstrong A *et al*: **OlympiAD final overall survival and tolerability results: Olaparib versus chemotherapy treatment of physician's choice in patients with a germline BRCA mutation and HER2-negative**

- 1  
2  
3 583 **metastatic breast cancer.** *ANN ONCOL* 2019, **30**(4):558-566.
- 4 584 16. White IR, Royston P, Wood AM: **Multiple imputation using chained equations: Issues and**  
5 585 **guidance for practice.** *STAT MED* 2011, **30**(4):377-399.
- 6 586 17. Vandembroucke JP, von Elm E, Altman DG, Gotzsche PC, Mulrow CD, Pocock SJ, Poole C,  
7 587 Schlesselman JJ, Egger M: **Strengthening the Reporting of Observational Studies in Epidemiology**  
8 588 **(STROBE): explanation and elaboration.** *INT J SURG* 2014, **12**(12):1500-1524.
- 9 589 18. Zhu F, Chen C, Zhang Y, Chen S, Huang X, Li J, Wang Y, Liu X, Deng G, Gao J: **Elevated**  
10 590 **blood mercury level has a non-linear association with infertility in U.S. women: Data from the**  
11 591 **NHANES 2013-2016.** *REPROD TOXICOL* 2020, **91**:53-58.
- 12 592 19. Zheng X, Cao C, He Y, Wang X, Wu J, Hu H: **Association between nonalcoholic fatty liver**  
13 593 **disease and incident diabetes mellitus among Japanese: a retrospective cohort study using**  
14 594 **propensity score matching.** *LIPIDS HEALTH DIS* 2021, **20**(1):59.
- 15 595 20. Mullee A, Romaguera D, Pearson-Stuttard J, Viallon V, Stepien M, Freisling H, Fagherazzi G,  
16 596 Mancini FR, Boutron-Ruault MC, Kuhn T *et al*: **Association Between Soft Drink Consumption and**  
17 597 **Mortality in 10 European Countries.** *JAMA INTERN MED* 2019, **179**(11):1479-1490.
- 18 598 21. Keidel D, Anto JM, Basagana X, Bono R, Burte E, Carsin AE, Forsberg B, Fuertes E, Galobardes  
19 599 B, Heinrich J *et al*: **The Role of Socioeconomic Status in the Association of Lung Function and Air**  
20 600 **Pollution-A Pooled Analysis of Three Adult ESCAPE Cohorts.** *INT J ENV RES PUB HE* 2019,  
21 601 **16**(11).
- 22 602 22. von Elm E, Altman DG, Egger M, Pocock SJ, Gotzsche PC, Vandembroucke JP: **The**  
23 603 **Strengthening the Reporting of Observational Studies in Epidemiology (STROBE) Statement:**  
24 604 **guidelines for reporting observational studies.** *INT J SURG* 2014, **12**(12):1495-1499.
- 25 605 23. Yamamoto M, Fujihara K, Ishizawa M, Osawa T, Kaneko M, Ishiguro H, Matsubayashi Y, Seida  
26 606 H, Yamanaka N, Tanaka S *et al*: **Pulse Pressure is a Stronger Predictor Than Systolic Blood**  
27 607 **Pressure for Severe Eye Diseases in Diabetes Mellitus.** *J AM HEART ASSOC* 2019, **8**(8):e10627.
- 28 608 24. Al-Qamari A, Adeleke I, Kretzer A, Hogue CW: **Pulse pressure and perioperative stroke.**  
29 609 *CURR OPIN ANESTHESIO* 2019, **32**(1):57-63.
- 30 610 25. Li J, Huang JY, Lo K, Zhang B, Huang YQ, Feng YQ: **Association of pulse pressure with**  
31 611 **all-cause mortality in young adults.** *POSTGRAD MED J* 2020, **96**(1138):461-466.
- 32 612 26. St-Louis E, Sudarshan M, Al-Habboubi M, El-Husseini HM, Deckelbaum DL, Razek TS,  
33 613 Feldman LS, Khwaja K: **The outcomes of the elderly in acute care general surgery.** *EUR J*  
34 614 *TRAUMA EMERG S* 2016, **42**(1):107-113.
- 35 615 27. Brown CT, Neuman MD: **Optimizing Perioperative Care for Older Adults.** *Anesthesiol Clin*  
36 616 2015, **33**(3):xv-xvi.
- 37 617 28. Gavish B, Bursztyn M: **Ambulatory pulse pressure components: concept, determination and**  
38 618 **clinical relevance.** *J HYPERTENS* 2019, **37**(4):765-774.
- 39 619 29. Payne RA, Wilkinson IB, Webb DJ: **Arterial stiffness and hypertension: emerging concepts.**  
40 620 *HYPERTENSION* 2010, **55**(1):9-14.
- 41 621 30. Zhang L, Wang B, Wang C, Li L, Ren Y, Zhang H, Yang X, Zhao Y, Han C, Zhou J *et al*: **High**  
42 622 **pulse pressure is related to risk of type 2 diabetes mellitus in Chinese middle-aged females.** *INT J*  
43 623 *CARDIOL* 2016, **220**:467-471.
- 44 624 31. Yasuno S, Ueshima K, Oba K, Fujimoto A, Hirata M, Ogihara T, Saruta T, Nakao K: **Is pulse**  
45 625 **pressure a predictor of new-onset diabetes in high-risk hypertensive patients?: a subanalysis of**  
46 626 **the Candesartan Antihypertensive Survival Evaluation in Japan (CASE-J) trial.** *DIABETES*

- 1  
2  
3 627 *CARE* 2010, **33**(5):1122-1127.
- 4 628 32. Kwon YJ, Chung TH, Shim JY, Lee YJ: **The association of pulse pressure with metabolic**  
5 629 **syndrome in Korean elderly: A nationwide population-based study.** *DIABETES RES CLIN PR*  
6 630 2017, **123**:75-81.
- 7 631 33. Zhang X, Li Y, Wang F, Zang J, Liu X, Zhang H, Yang K, Zhang G, Wang C: **Independent and**  
8 632 **combined effects of resting heart rate and pulse pressure with metabolic syndrome in Chinese**  
9 633 **rural population: The Henan Rural Cohort study.** *CLIN CHIM ACTA* 2018, **484**:246-252.
- 10 634 34. Li WJ, Fang W, Cai ZF, Han X, Zheng MY, Chen GZ, Wu WQ, Chen ZC, Chen YR, Wu SL:  
11 635 **[Association between pulse pressure and new-onset diabetes in hypertensive patients].** *Zhonghua*  
12 636 *Xin Xue Guan Bing Za Zhi* 2021, **49**(7):673-679.
- 13 637 35. Wu Y, Han X, Gao J, Wang Y, Zhu C, Huang Z, Xing A, Chen S, Ma Y, Zheng M *et al*:  
14 638 **Individual and combined contributions of age-specific and sex-specific pulse pressure and**  
15 639 **brachial-ankle pulse wave velocity to the risk of new-onset diabetes mellitus.** *BMJ OPEN DIAB*  
16 640 *RES CA* 2021, **9**(1).
- 17 641 36. Chen JY, Chou CH, Lee YL, Tsai WC, Lin CC, Huang YY, Chen JH: **Association of central**  
18 642 **aortic pressures indexes with development of diabetes mellitus in essential hypertension.** *AM J*  
19 643 *HYPERTENS* 2010, **23**(10):1069-1073.
- 20 644 37. Juneja A, Dwivedi S, Srivastava DK, Chandra K: **Insulin Resistance in Young Obese Subjects**  
21 645 **and Its Relation to Smoking (A Pilot Study).** *INDIAN J CLIN BIOCHE* 2017, **32**(1):99-102.
- 22 646 38. Ciarambino T, Crispino P, Guarisco G, Giordano M: **Gender Differences in Insulin Resistance:**  
23 647 **New Knowledge and Perspectives.** *CURR ISSUES MOL BIOL* 2023, **45**(10):7845-7861.
- 24 648 39. Muris DM, Houben AJ, Schram MT, Stehouwer CD: **Microvascular dysfunction is associated**  
25 649 **with a higher incidence of type 2 diabetes mellitus: a systematic review and meta-analysis.**  
26 650 *ARTERIOSCL THROM VAS* 2012, **32**(12):3082-3094.
- 27 651 40. Levy BI, Schiffrin EL, Mourad JJ, Agostini D, Vicaute E, Safar ME, Struijker-Boudier HA:  
28 652 **Impaired tissue perfusion: a pathology common to hypertension, obesity, and diabetes mellitus.**  
29 653 *CIRCULATION* 2008, **118**(9):968-976.
- 30 654 41. Vincent MA, Clerk LH, Lindner JR, Klibanov AL, Clark MG, Rattigan S, Barrett EJ:  
31 655 **Microvascular recruitment is an early insulin effect that regulates skeletal muscle glucose uptake**  
32 656 **in vivo.** *DIABETES* 2004, **53**(6):1418-1423.
- 33 657 42. Malik AR, Kondragunta V, Kullo IJ: **Forearm vascular reactivity and arterial stiffness in**  
34 658 **asymptomatic adults from the community.** *HYPERTENSION* 2008, **51**(6):1512-1518.
- 35 659 43. Malik AR, Kondragunta V, Kullo IJ: **Forearm vascular reactivity and arterial stiffness in**  
36 660 **asymptomatic adults from the community.** *HYPERTENSION* 2008, **51**(6):1512-1518.
- 37 661 44. O'Rourke MF, Hashimoto J: **Mechanical factors in arterial aging: a clinical perspective.** *J AM*  
38 662 *COLL CARDIOL* 2007, **50**(1):1-13.
- 39 663 45. Ungvari Z, Csiszar A, Kaminski PM, Wolin MS, Koller A: **Chronic high pressure-induced**  
40 664 **arterial oxidative stress: involvement of protein kinase C-dependent NAD(P)H oxidase and local**  
41 665 **renin-angiotensin system.** *AM J PATHOL* 2004, **165**(1):219-226.
- 42 666  
43 667  
44  
45  
46  
47  
48  
49  
50  
51  
52  
53  
54  
55  
56  
57  
58  
59  
60



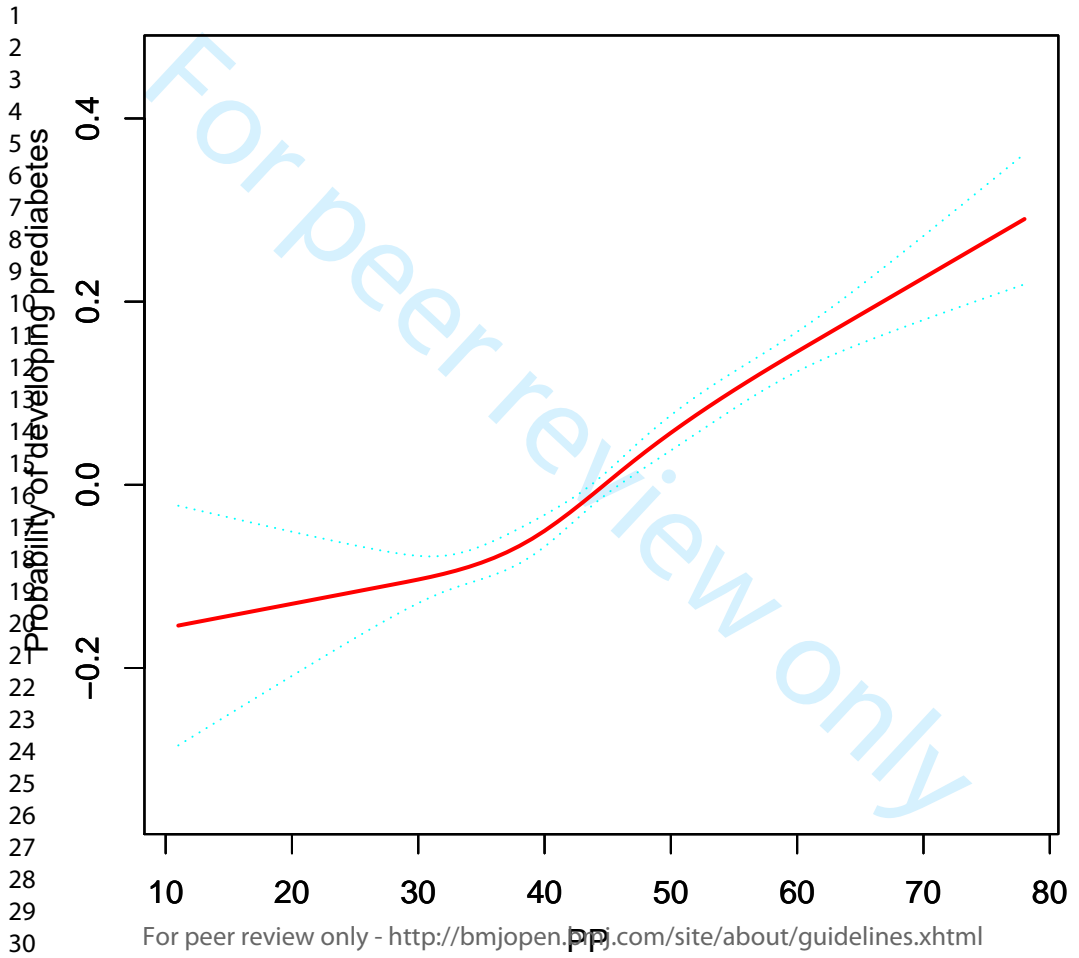

**Supplemental Table 1** Incidence rate of incident prediabetes.

| PP          | Participants (n) | prediabetes events (n) | Cumulative incidence (95%CI) (%) | Per 100,000 person-year |
|-------------|------------------|------------------------|----------------------------------|-------------------------|
| Total       | 182672           | 20284                  | 11.10 (10.96–11.25)              | 3532.68                 |
| Q1          | 39914            | 3560                   | 8.92(8.64–9.20)                  | 2779.24                 |
| Q2          | 47771            | 4525                   | 9.47 (9.21–9.73)                 | 2999.95                 |
| Q3          | 43811            | 4740                   | 10.82 (10.53–11.11)              | 3470.06                 |
| Q4          | 51176            | 7459                   | 14.58 (14.27–14.88)              | 4701.37                 |
| P for trend |                  |                        | <0.001                           | <0.001                  |

PP: pulse pressure, CI: confidence interval



**Supplemental Table 2** The results of the univariate analysis

|                            | Statistics       | HR (95%CI)           | P value |
|----------------------------|------------------|----------------------|---------|
| Gender                     |                  |                      | <0.001  |
| Male                       | 96966 (53.082%)  | ref                  |         |
| Female                     | 85706 (46.918%)  | 0.627 (0.609, 0.645) | <0.001  |
| Age(years)                 | 40.832 ± 11.864  | 1.033 (1.032, 1.034) | <0.001  |
| Drinking status            |                  |                      |         |
| Current-drinker            | 2924 (1.601%)    | ref                  |         |
| Ex-drinker                 | 22634 (12.391%)  | 0.770 (0.701, 0.846) | <0.001  |
| Never- drinker             | 157114 (86.009%) | 0.607 (0.556, 0.663) | <0.001  |
| Smoking status             |                  |                      |         |
| Current-smoker             | 29424 (16.108%)  | ref                  |         |
| Ex-smoker                  | 6566 (3.594%)    | 0.896 (0.834, 0.963) | 0.003   |
| Never-smoker               | 146682 (80.298%) | 0.714 (0.691, 0.739) | <0.001  |
| Family history of diabetes |                  |                      | 0.350   |
| No                         | 179039 (98.011%) | ref                  |         |
| Yes                        | 3633 (1.989%)    | 1.054 (0.965, 1.153) | 0.24372 |
| SBP (mmHg)                 | 117.428 ± 15.208 | 1.026 (1.025, 1.027) | <0.001  |
| DBP (mmHg)                 | 73.492 ± 10.572  | 1.029 (1.028, 1.030) | <0.001  |
| PP (mmHg)                  | 43.936 ± 10.595  | 1.025 (1.023, 1.026) | <0.001  |
| BMI (kg/m <sup>2</sup> )   | 22.976 ± 3.259   | 1.124 (1.120, 1.129) | <0.001  |
| AST(U/L)                   | 23.591 ± 12.164  | 1.005 (1.005, 1.006) | <0.001  |
| ALT (U/L)                  | 23.232 ± 21.734  | 1.003 (1.003, 1.004) | <0.001  |
| HDL-C (mmol/L)             | 1.372 ± 0.307    | 0.739 (0.707, 0.773) | <0.001  |
| TG (mmol/L)                | 1.267 ± 0.934    | 1.200 (1.192, 1.208) | <0.001  |
| LDL-C (mmol/L)             | 2.685 ± 0.671    | 1.280 (1.256, 1.305) | <0.001  |
| TC (mmol/L)                | 4.661 ± 0.882    | 1.220 (1.202, 1.238) | <0.001  |
| BUN (mmol/L)               | 4.602 ± 1.167    | 1.136 (1.124, 1.149) | <0.001  |
| SCr (umol/L)               | 69.565 ± 15.522  | 1.006 (1.006, 1.007) | <0.001  |
| FPG (mmol/L)               | 4.765 ± 0.487    | 5.711 (5.513, 5.916) | <0.001  |

PP: pulse pressure, SBP systolic blood pressure, DBP diastolic blood pressure, BMI body mass index, ALT alanine aminotransferase, AST aspartate aminotransferase, HDL-C high-density lipoprotein cholesterol, LDL-C low-density lipoprotein cholesterol, TC total cholesterol, TG triglycerides, Scr serum creatinine, BUN blood urea nitrogen, FPG fasting plasma glucose

**Supplemental Table 3** Relationship between PP and prediabetes in different sensitivity analyses

| Exposure      | Model I (HR,95%CI, P)       | Model II (HR,95%CI, P)      |
|---------------|-----------------------------|-----------------------------|
| PP            | 1.011 (1.009, 1.013) <0.001 | 1.008 (1.007, 1.010) <0.001 |
| PP (Quintile) |                             |                             |
| Q1            | Ref                         | Ref                         |
| Q2            | 1.055 (0.999, 1.115) 0.055  | 1.040 (0.993, 1.090) 0.097  |
| Q3            | 1.166 (1.104, 1.232) <0.001 | 1.123 (1.072, 1.177) <0.001 |
| Q4            | 1.310 (1.244, 1.379) <0.001 | 1.228 (1.175, 1.285) <0.001 |
| P for trend   | <0.001                      | <0.001                      |

Model I was sensitivity analysis in participants without BMI $\geq$ 25kg/m<sup>2</sup>. We adjusted gender, age, family history of diabetes, drinking status, smoking status, TC, TG, HDL-C, LDL-C, AST, ALT, SCr, BUN, and FPG.

Model II was sensitivity analysis in participants without age $\geq$ 60 years. We adjusted gender, family history of diabetes, drinking status, smoking status, BMI, TC, TG, HDL-C, LDL-C, AST, ALT, SCr, BUN, and FPG.

HR, hazard ratios; CI, confidence; Ref: reference; PP: pulse pressure

**Supplemental Table 4** Variables included age, gender, smoking status, BMI, family history of diabetes, and drinking status interacted with PP

| Characteristic             | P-value |
|----------------------------|---------|
| Age                        | <0.001  |
| Gender                     | <0.001  |
| BMI                        | <0.001  |
| Family history of diabetes | <0.001  |
| Smoking status             | <0.001  |
| Drinking status            | <0.001  |

For peer review only

**Supplemental Table 5** Effect size of PP on prediabetes in prespecified and exploratory subgroups

| Characteristic             | No of participants | HR (95%CI)           | P value | P for interaction |
|----------------------------|--------------------|----------------------|---------|-------------------|
| Age, years                 |                    |                      |         | 0.134             |
| <60                        | 165813             | 1.008 (1.006, 1.009) | <0.001  |                   |
| ≥60                        | 16859              | 1.010 (1.007, 1.013) | <0.001  |                   |
| Gender                     |                    |                      |         | <0.001            |
| Male                       | 96966              | 1.006 (1.004, 1.008) | <0.001  |                   |
| Female                     | 85706              | 1.011 (1.009, 1.013) | <0.001  |                   |
| BMI (kg/m <sup>2</sup> )   |                    |                      |         | <0.001            |
| <25                        | 135554             | 1.012 (1.010, 1.014) | <0.001  |                   |
| ≥25                        | 47118              | 1.006 (1.004, 1.008) | <0.001  |                   |
| Smoking status             |                    |                      |         | 0.008             |
| Current smoker             | 29424              | 1.005 (1.002, 1.008) | <0.001  |                   |
| Ever smoker                | 6566               | 1.007 (1.001, 1.013) | 0.021   |                   |
| Never smoker               | 146682             | 1.010 (1.008, 1.011) | <0.001  |                   |
| Drinking status            |                    |                      |         | 0.271             |
| Current drinker            | 2924               | 1.014 (1.006, 1.022) | <0.001  |                   |
| Ever drinker               | 22634              | 1.007 (1.004, 1.010) | <0.001  |                   |
| Never drinker              | 157114             | 1.009 (1.007, 1.010) | <0.001  |                   |
| Family history of diabetes |                    |                      |         | 0.062             |
| No                         | 179039             | 1.009 (1.007, 1.010) | <0.001  |                   |
| Yes                        | 3633               | 1.001 (0.992, 1.009) | 0.907   |                   |

Note 1: The above model was adjusted for gender, age, family history of diabetes, drinking status, smoking status, BMI, TC, TG, HDL-C, LDL-C, AST, ALT, SCr, BUN, and FPG.

Note 2: The model is not adjusted for the stratification variable in each case.

**Supplemental Table 6** Relationship between PP and the incident prediabetes in pre-imputation data and imputed datasets

| Exposure                   | Pre-imputation   | Imputation       | P-value |
|----------------------------|------------------|------------------|---------|
| Participants               | 182672           | 182672           |         |
| Gender                     |                  |                  | 1.000   |
| Male                       | 96966 (53.082%)  | 96966 (53.082%)  |         |
| Female                     | 85706 (46.918%)  | 85706 (46.918%)  |         |
| Age(years)                 | 40.832 ± 11.864  | 40.832 ± 11.864  | 1.000   |
| Drinking status            |                  |                  | <0.001  |
| Current-drinker            | 978 (1.932%)     | 2924 (1.601%)    |         |
| Ex-drinker                 | 7340 (14.501%)   | 22634 (12.391%)  |         |
| Never- drinker             | 42299 (83.567%)  | 157114 (86.009%) |         |
| Smoking status             |                  |                  | <0.001  |
| Current-smoker             | 9609 (18.984%)   | 29424 (16.108%)  |         |
| Ex-smoker                  | 2104 (4.157%)    | 6566 (3.594%)    |         |
| Never-smoker               | 38904 (76.860%)  | 146682 (80.298%) |         |
| Family history of diabetes |                  |                  | 1.000   |
| No                         | 179039 (98.011%) | 179039 (98.011%) |         |
| Yes                        | 3633 (1.989%)    | 3633 (1.989%)    |         |
| BMI (kg/m <sup>2</sup> )   | 22.976 ± 3.259   | 22.976 ± 3.259   | 1.000   |
| AST(U/L)                   | 23.685 ± 12.404  | 23.591 ± 12.164  | 0.075   |
| ALT (U/L)                  | 23.219 ± 21.739  | 23.232 ± 21.734  | 0.854   |
| HDL-C (mmol/L)             | 1.378 ± 0.308    | 1.372 ± 0.307    | <0.001  |
| TG (mmol/L)                | 1.268 ± 0.934    | 1.267 ± 0.934    | 0.889   |
| LDL-C (mmol/L)             | 2.739 ± 0.669    | 2.685 ± 0.671    | <0.001  |
| TC (mmol/L)                | 4.663 ± 0.883    | 4.661 ± 0.882    | 0.630   |
| BUN (mmol/L)               | 4.604 ± 1.165    | 4.602 ± 1.167    | 0.630   |
| SCr (umol/L)               | 69.628 ± 15.507  | 69.565 ± 15.522  | 0.228   |
| FBG (mmol/L)               | 4.765 ± 0.487    | 4.765 ± 0.487    | 1.000   |

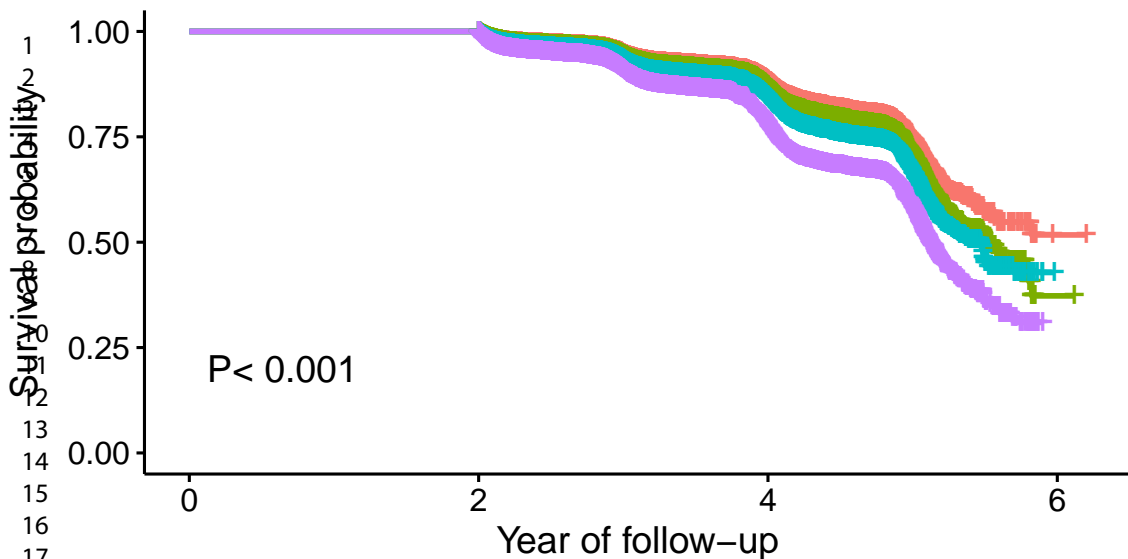

### Number at risk

|    | 0     | 2     | 3     | 4    | 5 | 6 |
|----|-------|-------|-------|------|---|---|
| PP | 39914 | 21231 | 9935  | 2027 | 1 |   |
| Q1 | 47771 | 24322 | 10844 | 2155 | 1 |   |
| Q2 | 43811 | 21525 | 9281  | 1760 | 0 |   |
| Q3 | 51176 | 24666 | 10207 | 2058 | 0 |   |

Year of follow-up

STROBE Statement—Checklist of items that should be included in reports of *cohort studies*

|                              | Item No | Recommendation                                                                                                                                                                                                                                                                                  | Page No  |
|------------------------------|---------|-------------------------------------------------------------------------------------------------------------------------------------------------------------------------------------------------------------------------------------------------------------------------------------------------|----------|
| <b>Title and abstract</b>    | 1       | (a) Indicate the study's design with a commonly used term in the title or the abstract<br>(b) Provide in the abstract an informative and balanced summary of what was done and what was found                                                                                                   | 1<br>3-4 |
| <b>Introduction</b>          |         |                                                                                                                                                                                                                                                                                                 |          |
| Background/rationale         | 2       | Explain the scientific background and rationale for the investigation being reported                                                                                                                                                                                                            | 6        |
| Objectives                   | 3       | State specific objectives, including any prespecified hypotheses                                                                                                                                                                                                                                | 6        |
| <b>Methods</b>               |         |                                                                                                                                                                                                                                                                                                 |          |
| Study design                 | 4       | Present key elements of study design early in the paper                                                                                                                                                                                                                                         | 7        |
| Setting                      | 5       | Describe the setting, locations, and relevant dates, including periods of recruitment, exposure, follow-up, and data collection                                                                                                                                                                 | 7        |
| Participants                 | 6       | (a) Give the eligibility criteria, and the sources and methods of selection of participants. Describe methods of follow-up                                                                                                                                                                      | 7        |
|                              |         | (b) For matched studies, give matching criteria and number of exposed and unexposed                                                                                                                                                                                                             | 7        |
| Variables                    | 7       | Clearly define all outcomes, exposures, predictors, potential confounders, and effect modifiers. Give diagnostic criteria, if applicable                                                                                                                                                        | 7-8      |
| Data sources/<br>measurement | 8*      | For each variable of interest, give sources of data and details of methods of assessment (measurement). Describe comparability of assessment methods if there is more than one group                                                                                                            | 7        |
| Bias                         | 9       | Describe any efforts to address potential sources of bias                                                                                                                                                                                                                                       |          |
| Study size                   | 10      | Explain how the study size was arrived at                                                                                                                                                                                                                                                       |          |
| Quantitative variables       | 11      | Explain how quantitative variables were handled in the analyses. If applicable, describe which groupings were chosen and why                                                                                                                                                                    | 7-8      |
| Statistical methods          | 12      | (a) Describe all statistical methods, including those used to control for confounding                                                                                                                                                                                                           | 8        |
|                              |         | (b) Describe any methods used to examine subgroups and interactions                                                                                                                                                                                                                             | 10       |
|                              |         | (c) Explain how missing data were addressed                                                                                                                                                                                                                                                     | 9        |
|                              |         | (d) If applicable, explain how loss to follow-up was addressed                                                                                                                                                                                                                                  |          |
|                              |         | (e) Describe any sensitivity analyses                                                                                                                                                                                                                                                           | 9        |
| <b>Results</b>               |         |                                                                                                                                                                                                                                                                                                 |          |
| Participants                 | 13*     | (a) Report numbers of individuals at each stage of study—eg numbers potentially eligible, examined for eligibility, confirmed eligible, included in the study, completing follow-up, and analysed<br>(b) Give reasons for non-participation at each stage<br>(c) Consider use of a flow diagram | 10-11    |
| Descriptive data             | 14*     | (a) Give characteristics of study participants (eg demographic, clinical, social) and information on exposures and potential confounders                                                                                                                                                        | 10-11    |
|                              |         | (b) Indicate number of participants with missing data for each variable of interest                                                                                                                                                                                                             |          |
|                              |         | (c) Summarise follow-up time (eg, average and total amount)                                                                                                                                                                                                                                     | 10-11    |
| Outcome data                 | 15*     | Report numbers of outcome events or summary measures over time                                                                                                                                                                                                                                  | 11       |

|    |                          |    |                                                                                                                                                                                                              |       |
|----|--------------------------|----|--------------------------------------------------------------------------------------------------------------------------------------------------------------------------------------------------------------|-------|
| 1  | Main results             | 16 | (a) Give unadjusted estimates and, if applicable, confounder-adjusted estimates and their precision (eg, 95% confidence interval). Make clear which confounders were adjusted for and why they were included | 11-12 |
| 2  |                          |    | (b) Report category boundaries when continuous variables were categorized                                                                                                                                    | 12    |
| 3  |                          |    | (c) If relevant, consider translating estimates of relative risk into absolute risk for a meaningful time period                                                                                             | 12    |
| 4  |                          |    |                                                                                                                                                                                                              |       |
| 5  | Other analyses           | 17 | Report other analyses done—eg analyses of subgroups and interactions, and sensitivity analyses                                                                                                               | 12-13 |
| 6  |                          |    |                                                                                                                                                                                                              |       |
| 7  |                          |    |                                                                                                                                                                                                              |       |
| 8  |                          |    |                                                                                                                                                                                                              |       |
| 9  |                          |    |                                                                                                                                                                                                              |       |
| 10 |                          |    |                                                                                                                                                                                                              |       |
| 11 | <b>Discussion</b>        |    |                                                                                                                                                                                                              |       |
| 12 | Key results              | 18 | Summarise key results with reference to study objectives                                                                                                                                                     | 13-14 |
| 13 | Limitations              | 19 | Discuss limitations of the study, taking into account sources of potential bias or imprecision. Discuss both direction and magnitude of any potential bias                                                   | 16-17 |
| 14 | Interpretation           | 20 | Give a cautious overall interpretation of results considering objectives, limitations, multiplicity of analyses, results from similar studies, and other relevant evidence                                   | 14-16 |
| 15 | Generalisability         | 21 | Discuss the generalisability (external validity) of the study results                                                                                                                                        | 16    |
| 16 |                          |    |                                                                                                                                                                                                              |       |
| 17 |                          |    |                                                                                                                                                                                                              |       |
| 18 |                          |    |                                                                                                                                                                                                              |       |
| 19 |                          |    |                                                                                                                                                                                                              |       |
| 20 |                          |    |                                                                                                                                                                                                              |       |
| 21 | <b>Other information</b> |    |                                                                                                                                                                                                              |       |
| 22 | Funding                  | 22 | Give the source of funding and the role of the funders for the present study and, if applicable, for the original study on which the present article is based                                                | 18    |
| 23 |                          |    |                                                                                                                                                                                                              |       |
| 24 |                          |    |                                                                                                                                                                                                              |       |
| 25 |                          |    |                                                                                                                                                                                                              |       |

\*Give information separately for exposed and unexposed groups.

**Note:** An Explanation and Elaboration article discusses each checklist item and gives methodological background and published examples of transparent reporting. The STROBE checklist is best used in conjunction with this article (freely available on the Web sites of PLoS Medicine at <http://www.plosmedicine.org/>, Annals of Internal Medicine at <http://www.annals.org/>, and Epidemiology at <http://www.epidem.com/>). Information on the STROBE Initiative is available at <http://www.strobe-statement.org>.
