# Supplementary material for: Non-linear relationship between pulse pressure and the risk of pre-diabetes: a secondary retrospective Chinese cohort study
Source: PubMed Central journal article supplement — BMJ Open. 2024 Mar 23;14(3):e080018. doi: 10.1136/bmjopen-2023-080018 (PMC10961532; doi:10.1136/bmjopen-2023-080018), 2024-03-23
Supplement: bmjopen-2023-080018supp002.pdf [file bmjopen-2023-080018supp002.pdf]

**Supplemental Table 1** Incidence rate of incident prediabetes.

| PP          | Participants (n) | prediabetes events (n) | Cumulative incidence (95%CI) (%) | Per 100,000 person-year |
|-------------|------------------|------------------------|----------------------------------|-------------------------|
| Total       | 182672           | 20284                  | 11.10 (10.96–11.25)              | 3532.68                 |
| Q1          | 39914            | 3560                   | 8.92(8.64–9.20)                  | 2779.24                 |
| Q2          | 47771            | 4525                   | 9.47 (9.21–9.73)                 | 2999.95                 |
| Q3          | 43811            | 4740                   | 10.82 (10.53–11.11)              | 3470.06                 |
| Q4          | 51176            | 7459                   | 14.58 (14.27–14.88)              | 4701.37                 |
| P for trend |                  |                        | <0.001                           | <0.001                  |

PP: pulse pressure, CI: confidence interval

**Supplemental Table 2** The results of the univariate analysis

|                            | Statistics       | HR (95%CI)           | P value |
|----------------------------|------------------|----------------------|---------|
| Gender                     |                  |                      | <0.001  |
| Male                       | 96966 (53.082%)  | ref                  |         |
| Female                     | 85706 (46.918%)  | 0.627 (0.609, 0.645) | <0.001  |
| Age(years)                 | 40.832 ± 11.864  | 1.033 (1.032, 1.034) | <0.001  |
| Drinking status            |                  |                      |         |
| Current-drinker            | 2924 (1.601%)    | ref                  |         |
| Ex-drinker                 | 22634 (12.391%)  | 0.770 (0.701, 0.846) | <0.001  |
| Never- drinker             | 157114 (86.009%) | 0.607 (0.556, 0.663) | <0.001  |
| Smoking status             |                  |                      |         |
| Current-smoker             | 29424 (16.108%)  | ref                  |         |
| Ex-smoker                  | 6566 (3.594%)    | 0.896 (0.834, 0.963) | 0.003   |
| Never-smoker               | 146682 (80.298%) | 0.714 (0.691, 0.739) | <0.001  |
| Family history of diabetes |                  |                      | 0.350   |
| No                         | 179039 (98.011%) | ref                  |         |
| Yes                        | 3633 (1.989%)    | 1.054 (0.965, 1.153) | 0.24372 |
| SBP (mmHg)                 | 117.428 ± 15.208 | 1.026 (1.025, 1.027) | <0.001  |
| DBP (mmHg)                 | 73.492 ± 10.572  | 1.029 (1.028, 1.030) | <0.001  |
| PP (mmHg)                  | 43.936 ± 10.595  | 1.025 (1.023, 1.026) | <0.001  |
| BMI (kg/m <sup>2</sup> )   | 22.976 ± 3.259   | 1.124 (1.120, 1.129) | <0.001  |
| AST(U/L)                   | 23.591 ± 12.164  | 1.005 (1.005, 1.006) | <0.001  |
| ALT (U/L)                  | 23.232 ± 21.734  | 1.003 (1.003, 1.004) | <0.001  |
| HDL-C (mmol/L)             | 1.372 ± 0.307    | 0.739 (0.707, 0.773) | <0.001  |
| TG (mmol/L)                | 1.267 ± 0.934    | 1.200 (1.192, 1.208) | <0.001  |
| LDL-C (mmol/L)             | 2.685 ± 0.671    | 1.280 (1.256, 1.305) | <0.001  |
| TC (mmol/L)                | 4.661 ± 0.882    | 1.220 (1.202, 1.238) | <0.001  |
| BUN (mmol/L)               | 4.602 ± 1.167    | 1.136 (1.124, 1.149) | <0.001  |
| SCr (umol/L)               | 69.565 ± 15.522  | 1.006 (1.006, 1.007) | <0.001  |
| FPG (mmol/L)               | 4.765 ± 0.487    | 5.711 (5.513, 5.916) | <0.001  |

PP: pulse pressure, SBP systolic blood pressure, DBP diastolic blood pressure, BMI body mass index, ALT alanine aminotransferase, AST aspartate aminotransferase, HDL-C high-density lipoprotein cholesterol, LDL-C low-density lipoprotein cholesterol, TC total cholesterol, TG triglycerides, Scr serum creatinine, BUN blood urea nitrogen, FPG fasting plasma glucose

**Supplemental Table 3** Relationship between PP and prediabetes in different sensitivity analyses

| Exposure      | Model I (HR,95%CI, P)       | Model II (HR,95%CI, P)      |
|---------------|-----------------------------|-----------------------------|
| PP            | 1.011 (1.009, 1.013) <0.001 | 1.008 (1.007, 1.010) <0.001 |
| PP (Quintile) |                             |                             |
| Q1            | Ref                         | Ref                         |
| Q2            | 1.055 (0.999, 1.115) 0.055  | 1.040 (0.993, 1.090) 0.097  |
| Q3            | 1.166 (1.104, 1.232) <0.001 | 1.123 (1.072, 1.177) <0.001 |
| Q4            | 1.310 (1.244, 1.379) <0.001 | 1.228 (1.175, 1.285) <0.001 |
| P for trend   | <0.001                      | <0.001                      |

Model I was sensitivity analysis in participants without BMI $\geq$ 25kg/m<sup>2</sup>. We adjusted gender, age, family history of diabetes, drinking status, smoking status, TC, TG, HDL-C, LDL-C, AST, ALT, SCr, BUN, and FPG.

Model II was sensitivity analysis in participants without age $\geq$ 60 years. We adjusted gender, family history of diabetes, drinking status, smoking status, BMI, TC, TG, HDL-C, LDL-C, AST, ALT, SCr, BUN, and FPG.

HR, hazard ratios; CI, confidence; Ref: reference; PP: pulse pressure

**Supplemental Table 4** Variables included age, gender, smoking status, BMI, family history of diabetes, and drinking status interacted with PP

| Characteristic             | P-value |
|----------------------------|---------|
| Age                        | <0.001  |
| Gender                     | <0.001  |
| BMI                        | <0.001  |
| Family history of diabetes | <0.001  |
| Smoking status             | <0.001  |
| Drinking status            | <0.001  |

**Supplemental Table 5** Effect size of PP on prediabetes in prespecified and exploratory subgroups

| Characteristic             | No of participants | HR (95%CI)           | P value | P for interaction |
|----------------------------|--------------------|----------------------|---------|-------------------|
| Age, years                 |                    |                      |         | 0.134             |
| <60                        | 165813             | 1.008 (1.006, 1.009) | <0.001  |                   |
| ≥60                        | 16859              | 1.010 (1.007, 1.013) | <0.001  |                   |
| Gender                     |                    |                      |         | <0.001            |
| Male                       | 96966              | 1.006 (1.004, 1.008) | <0.001  |                   |
| Female                     | 85706              | 1.011 (1.009, 1.013) | <0.001  |                   |
| BMI (kg/m <sup>2</sup> )   |                    |                      |         | <0.001            |
| <25                        | 135554             | 1.012 (1.010, 1.014) | <0.001  |                   |
| ≥25                        | 47118              | 1.006 (1.004, 1.008) | <0.001  |                   |
| Smoking status             |                    |                      |         | 0.008             |
| Current smoker             | 29424              | 1.005 (1.002, 1.008) | <0.001  |                   |
| Ever smoker                | 6566               | 1.007 (1.001, 1.013) | 0.021   |                   |
| Never smoker               | 146682             | 1.010 (1.008, 1.011) | <0.001  |                   |
| Drinking status            |                    |                      |         | 0.271             |
| Current drinker            | 2924               | 1.014 (1.006, 1.022) | <0.001  |                   |
| Ever drinker               | 22634              | 1.007 (1.004, 1.010) | <0.001  |                   |
| Never drinker              | 157114             | 1.009 (1.007, 1.010) | <0.001  |                   |
| Family history of diabetes |                    |                      |         | 0.062             |
| No                         | 179039             | 1.009 (1.007, 1.010) | <0.001  |                   |
| Yes                        | 3633               | 1.001 (0.992, 1.009) | 0.907   |                   |

Note 1: The above model was adjusted for gender, age, family history of diabetes, drinking status, smoking status, BMI, TC, TG, HDL-C, LDL-C, AST, ALT, SCr, BUN, and FPG.

Note 2: The model is not adjusted for the stratification variable in each case.

**Supplemental Table 6** Relationship between PP and the incident prediabetes in pre-imputation data and imputed datasets

| Exposure                   | Pre-imputation   | Imputation       | P-value |
|----------------------------|------------------|------------------|---------|
| Participants               | 182672           | 182672           |         |
| Gender                     |                  |                  | 1.000   |
| Male                       | 96966 (53.082%)  | 96966 (53.082%)  |         |
| Female                     | 85706 (46.918%)  | 85706 (46.918%)  |         |
| Age(years)                 | 40.832 ± 11.864  | 40.832 ± 11.864  | 1.000   |
| Drinking status            |                  |                  | <0.001  |
| Current-drinker            | 978 (1.932%)     | 2924 (1.601%)    |         |
| Ex-drinker                 | 7340 (14.501%)   | 22634 (12.391%)  |         |
| Never- drinker             | 42299 (83.567%)  | 157114 (86.009%) |         |
| Smoking status             |                  |                  | <0.001  |
| Current-smoker             | 9609 (18.984%)   | 29424 (16.108%)  |         |
| Ex-smoker                  | 2104 (4.157%)    | 6566 (3.594%)    |         |
| Never-smoker               | 38904 (76.860%)  | 146682 (80.298%) |         |
| Family history of diabetes |                  |                  | 1.000   |
| No                         | 179039 (98.011%) | 179039 (98.011%) |         |
| Yes                        | 3633 (1.989%)    | 3633 (1.989%)    |         |
| BMI (kg/m <sup>2</sup> )   | 22.976 ± 3.259   | 22.976 ± 3.259   | 1.000   |
| AST(U/L)                   | 23.685 ± 12.404  | 23.591 ± 12.164  | 0.075   |
| ALT (U/L)                  | 23.219 ± 21.739  | 23.232 ± 21.734  | 0.854   |
| HDL-C (mmol/L)             | 1.378 ± 0.308    | 1.372 ± 0.307    | <0.001  |
| TG (mmol/L)                | 1.268 ± 0.934    | 1.267 ± 0.934    | 0.889   |
| LDL-C (mmol/L)             | 2.739 ± 0.669    | 2.685 ± 0.671    | <0.001  |
| TC (mmol/L)                | 4.663 ± 0.883    | 4.661 ± 0.882    | 0.630   |
| BUN (mmol/L)               | 4.604 ± 1.165    | 4.602 ± 1.167    | 0.630   |
| SCr (umol/L)               | 69.628 ± 15.507  | 69.565 ± 15.522  | 0.228   |
| FPG (mmol/L)               | 4.765 ± 0.487    | 4.765 ± 0.487    | 1.000   |
