# Supplementary figures and images for: Non-linear relationship between pulse pressure and the risk of pre-diabetes: a secondary retrospective Chinese cohort study
Source: PubMed Central journal article supplement — BMJ Open. 2024 Mar 23;14(3):e080018. doi: 10.1136/bmjopen-2023-080018 (PMC10961532; doi:10.1136/bmjopen-2023-080018), 2024-03-23

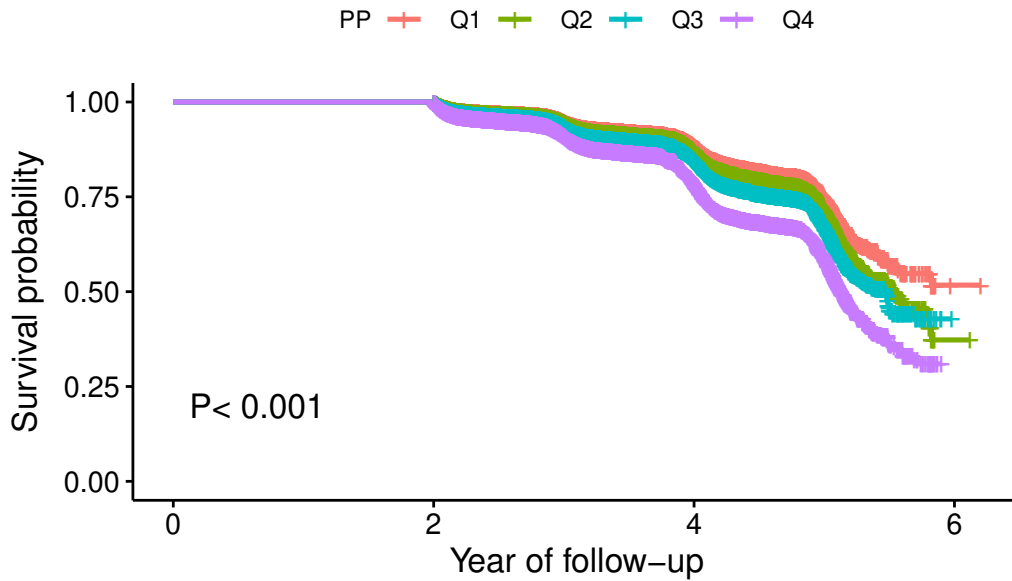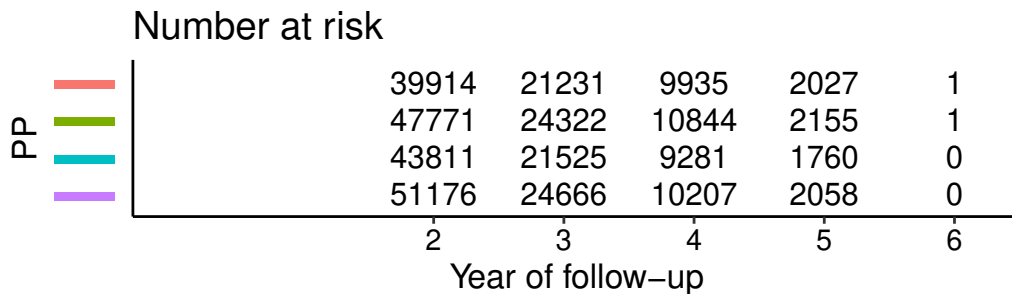

Supplement: bmjopen-2023-080018supp001.pdf [file bmjopen-2023-080018supp001.pdf]
